# Supplementary material for: Synthesis and evaluation of N-alkylated analogues of aza-galacto-fagomine – potential pharmacological chaperones for Krabbe disease
Source: Royal Society of Chemistry journal article supplement (doi:10.1039/c6ob01309k), 2016-01-01

# Synthesis and evaluation of alkylated analogues of azagalactofagomine – potential pharmacological chaperones for Krabbe disease

Agnete H. Viuff<sup>a</sup> and Henrik H. Jensen<sup>a\*</sup>

<sup>a</sup>*Department of Chemistry, Aarhus University, Langelandsgade 140, 8000, Aarhus C, Denmark.*

## Supporting Information

### Content

|                                                                                       |    |
|---------------------------------------------------------------------------------------|----|
| <sup>1</sup> H-NMR and <sup>13</sup> C-NMR spectra for compounds <b>10-41</b> : ..... | 2  |
| Michaelis-Menten and Hanes plots: .....                                               | 37 |

$^1\text{H-NMR}$  and  $^{13}\text{C-NMR}$  spectra for compounds **10-41**:

**Methyl L-ribofuranoside (10):**

$^1\text{H-NMR}$  (400 MHz,  $\text{CD}_3\text{OD}$ )

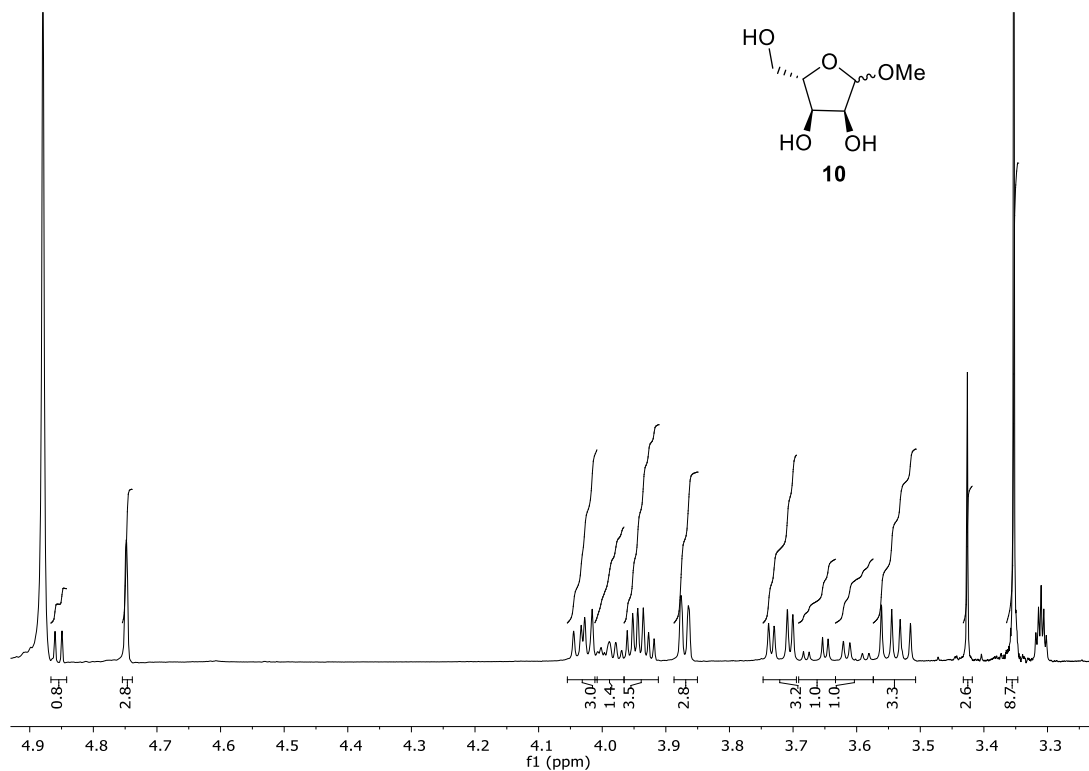

$^{13}\text{C-NMR}$  (100 MHz,  $\text{CD}_3\text{OD}$ ):

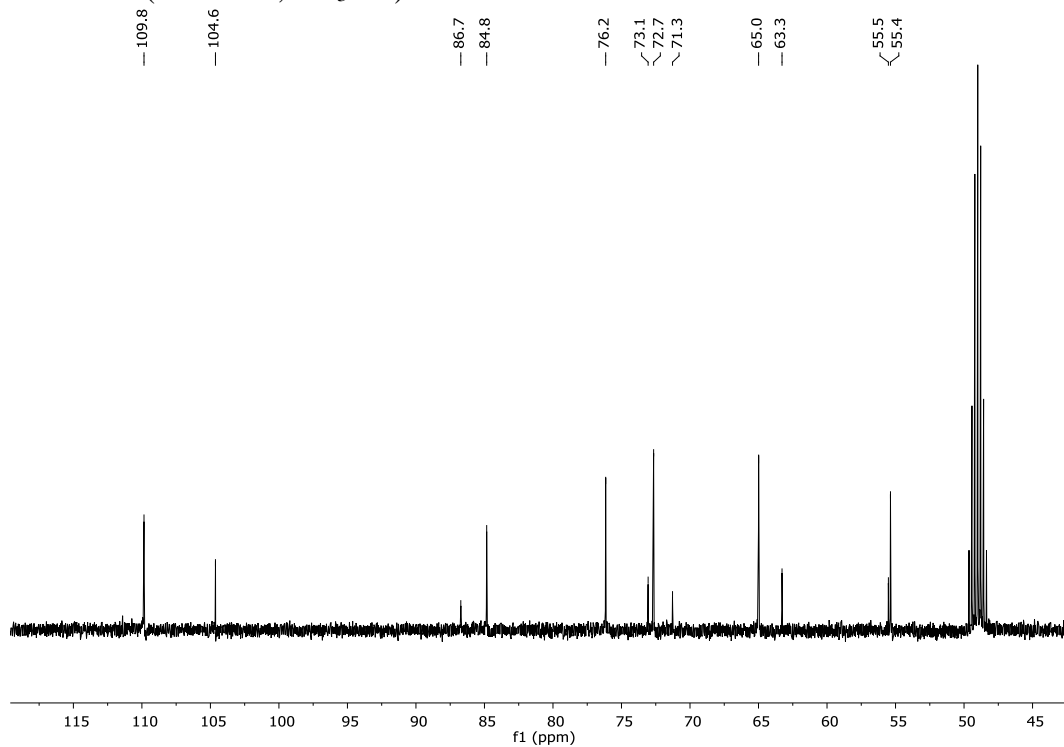

**Methyl- $\alpha$ -2,3,5-tri-*O*-benzyl-L-ribofuranoside (11 $\alpha$ )**

$^1\text{H-NMR}$  (400 MHz,  $\text{CDCl}_3$ )

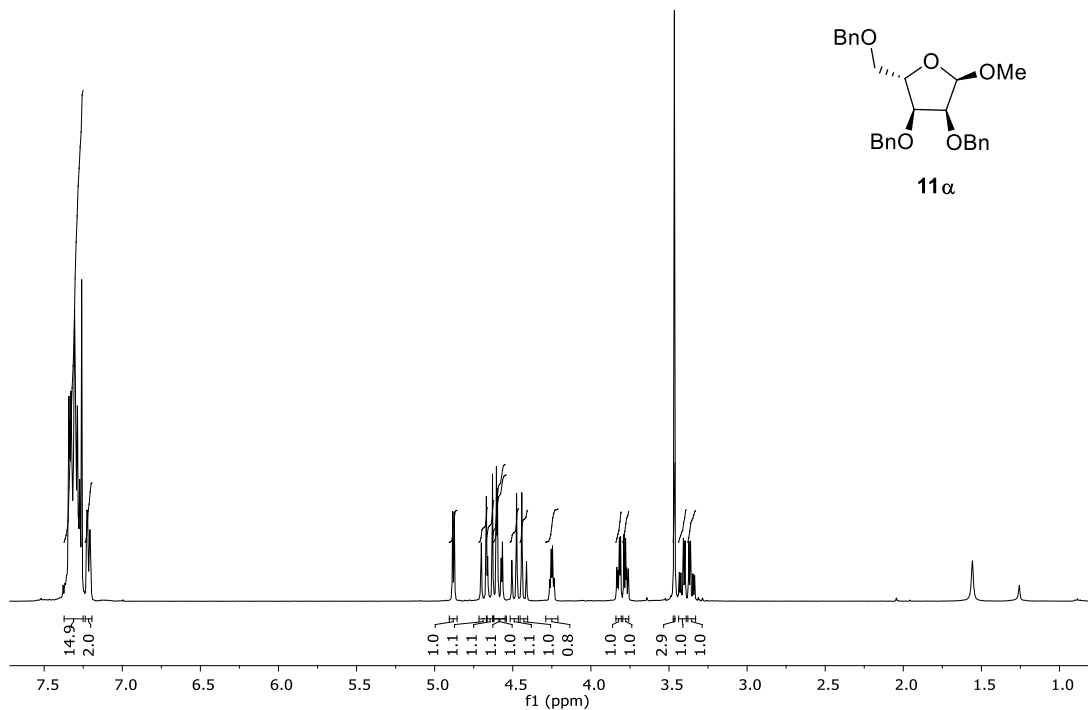

$^{13}\text{C-NMR}$  (100 MHz,  $\text{CDCl}_3$ ):

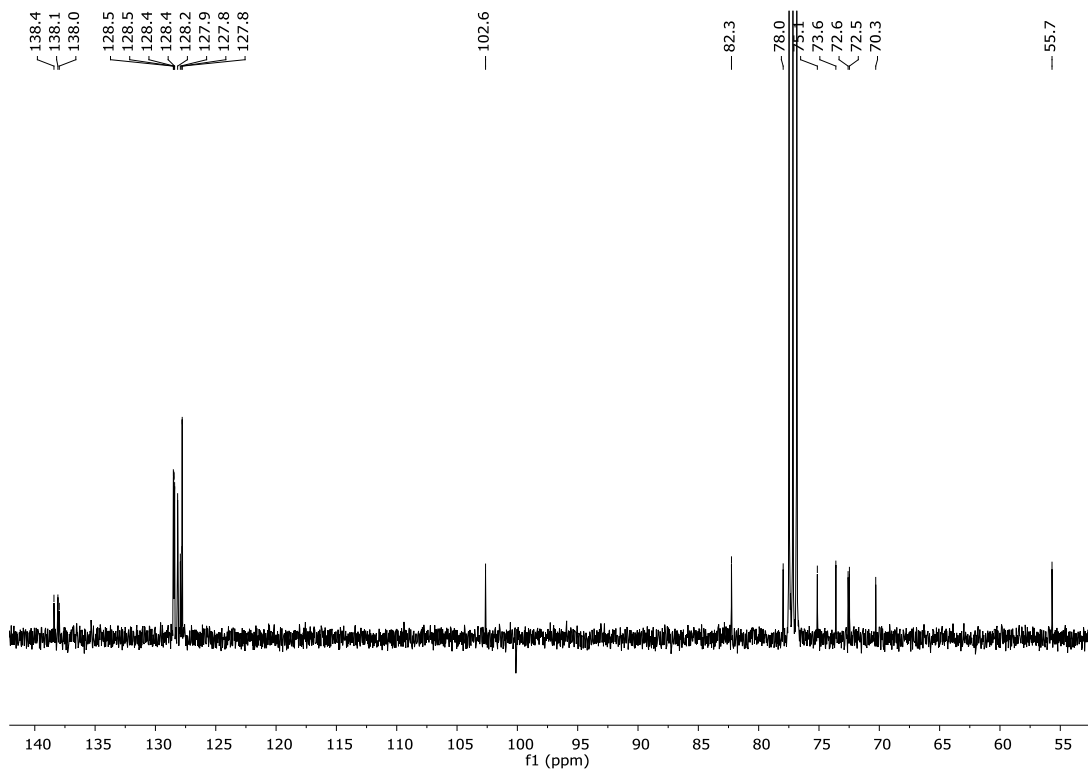

**Methyl- $\beta$ -2,3,5-tri-*O*-benzyl-L-ribofuranoside (11 $\beta$ ):**

$^1\text{H-NMR}$  (400 MHz,  $\text{CDCl}_3$ )

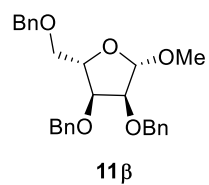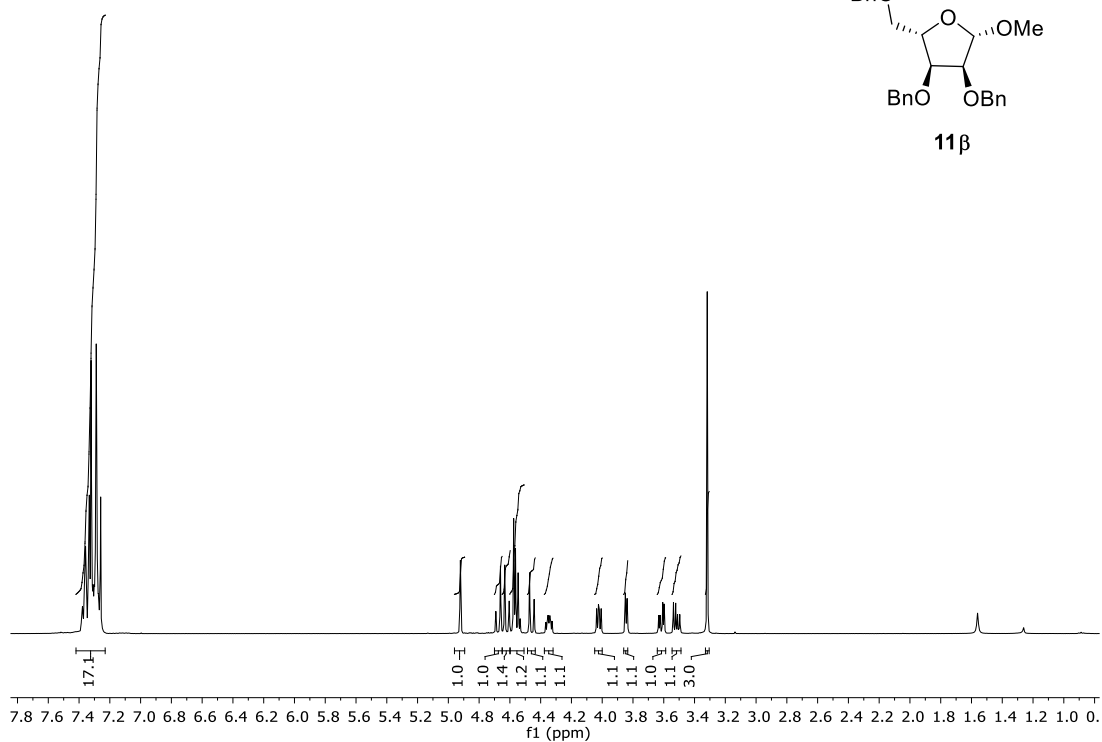

$^{13}\text{C-NMR}$  (100 MHz,  $\text{CDCl}_3$ ):

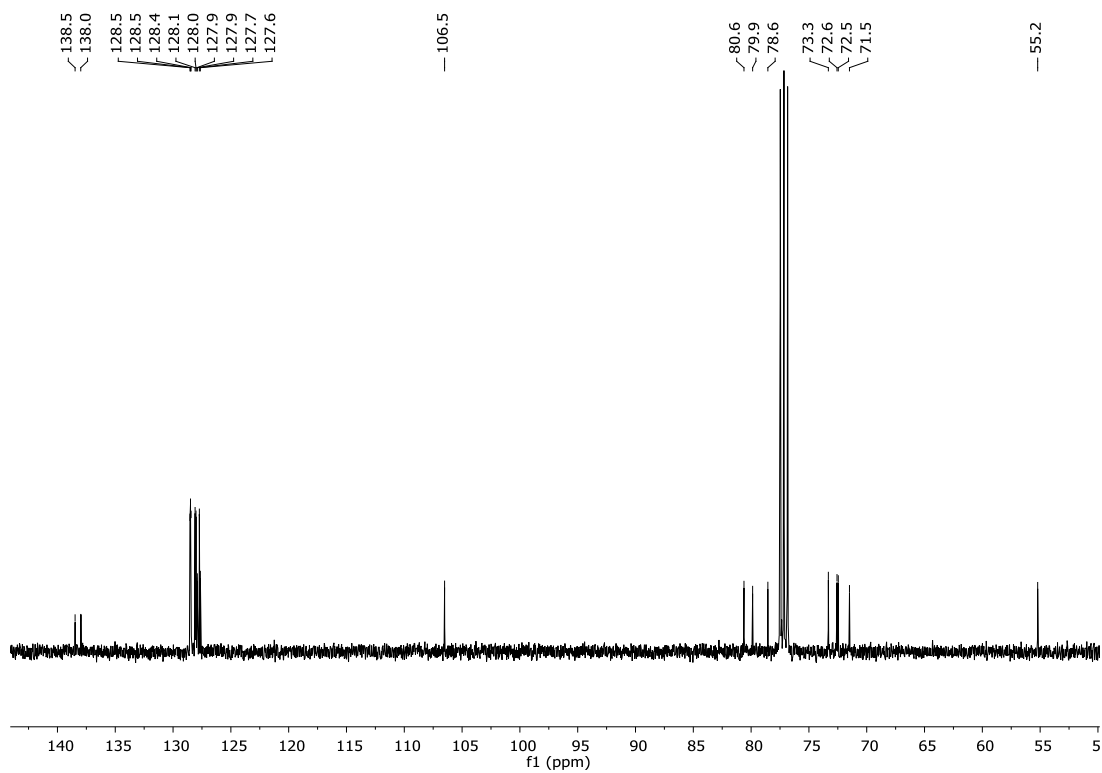

**2,3,5-tri-*O*-benzyl-L-ribofuranose (12):**

$^1\text{H-NMR}$  (400 MHz,  $\text{CDCl}_3$ )

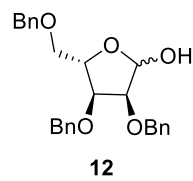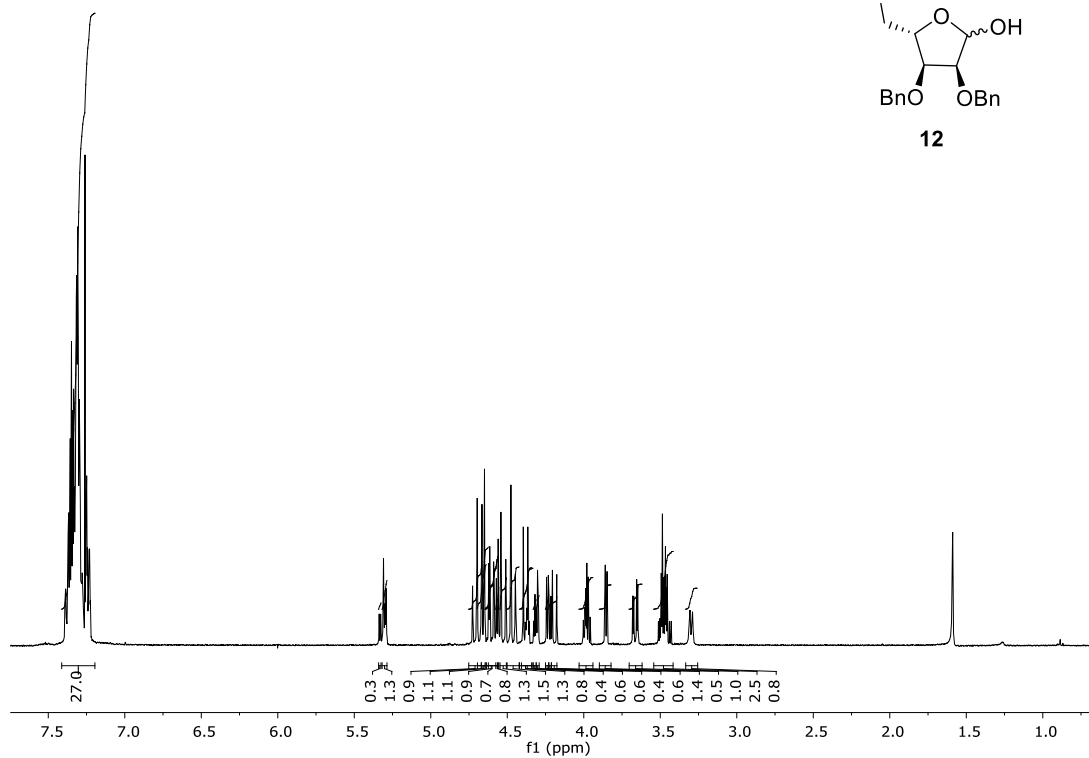

$^{13}\text{C-NMR}$  (100 MHz,  $\text{CDCl}_3$ ):

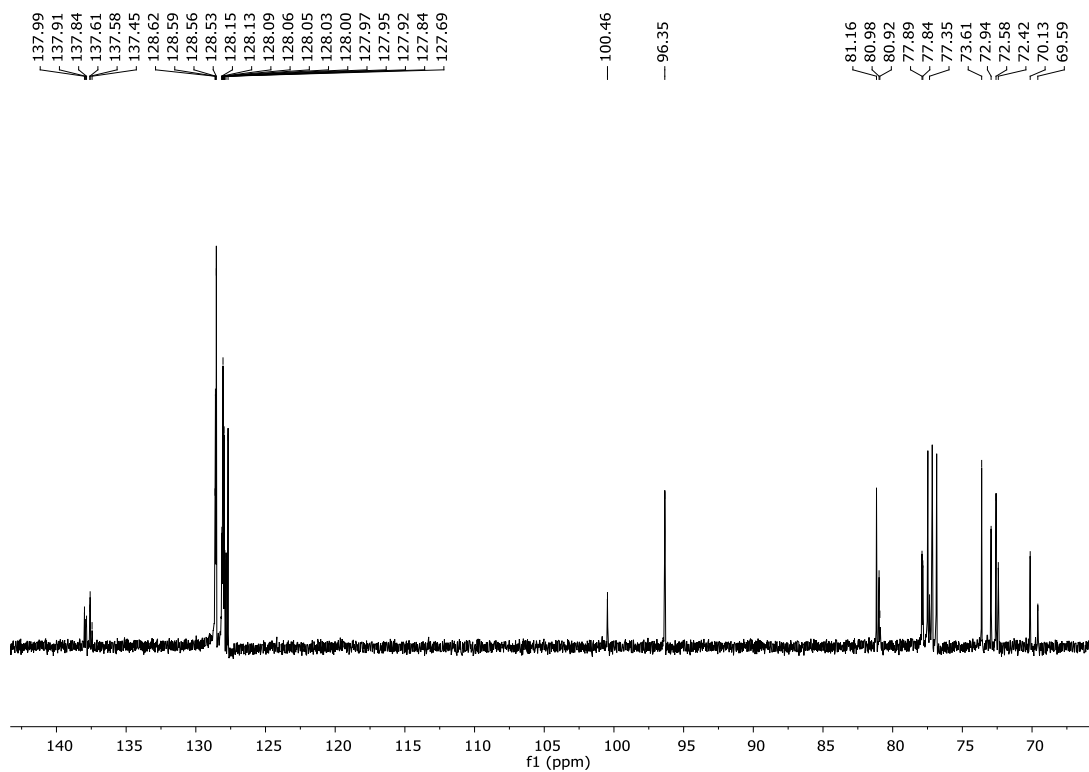

**1-(*tert*-butyloxycarbonyl)hydrazino-1-deoxy-2,3,5-tri-*O*-benzyl-L-ribose (13):**

<sup>1</sup>H-NMR (400 MHz, CDCl<sub>3</sub>)

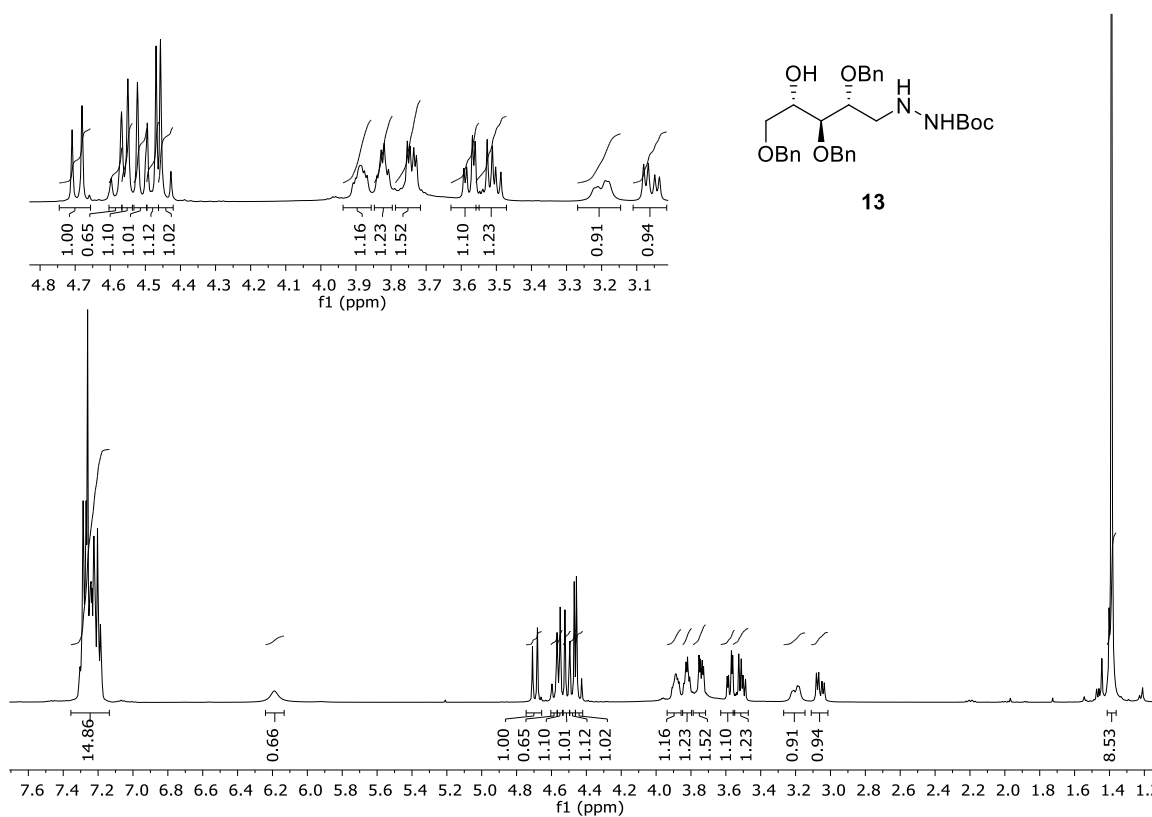

<sup>13</sup>C-NMR (100 MHz, CDCl<sub>3</sub>)

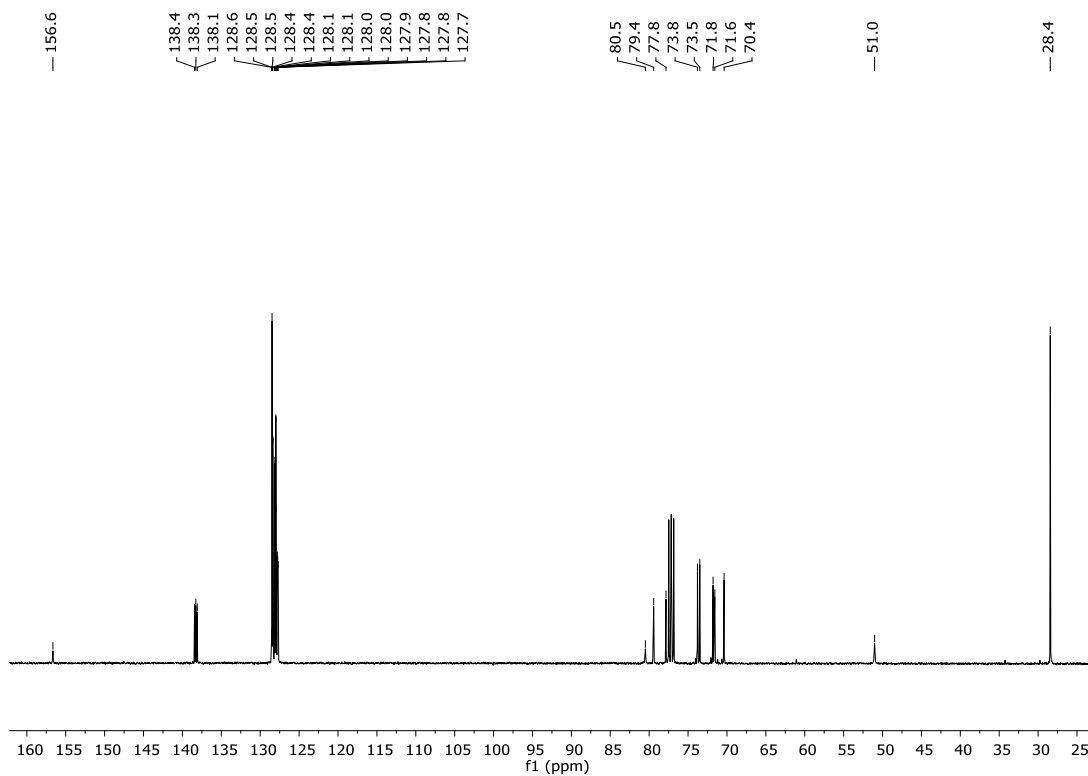

**1-(1-Acetyl-2-hexadecyl)hydrazino-1-deoxy-2,3,5-tri-O-benzyl-4-methanesulfonyl-L-ribose (16):**

<sup>1</sup>H NMR (400 MHz, CDCl<sub>3</sub>):

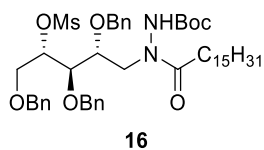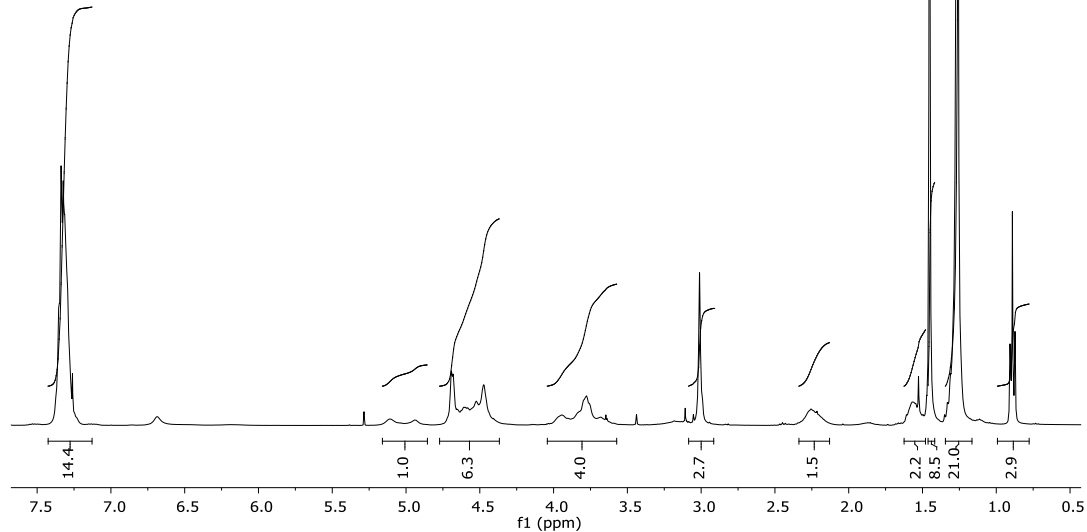

<sup>13</sup>C NMR (100 MHz, CDCl<sub>3</sub>):

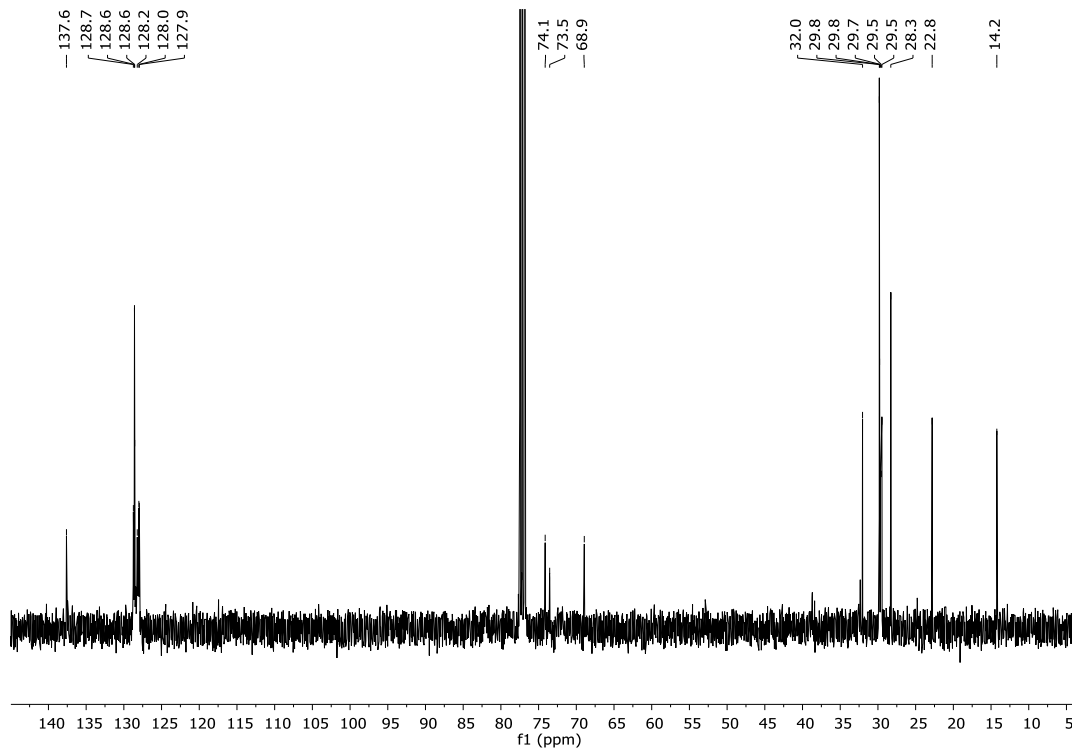

**1-(2-palmitoyl)hydrazino-1-deoxy-2,3,5-tri-O-benzyl-4-methanesulfonyl-L-ribose (20):**

$^1\text{H}$  NMR (400 MHz,  $\text{CDCl}_3$ ):

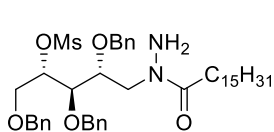

**20**

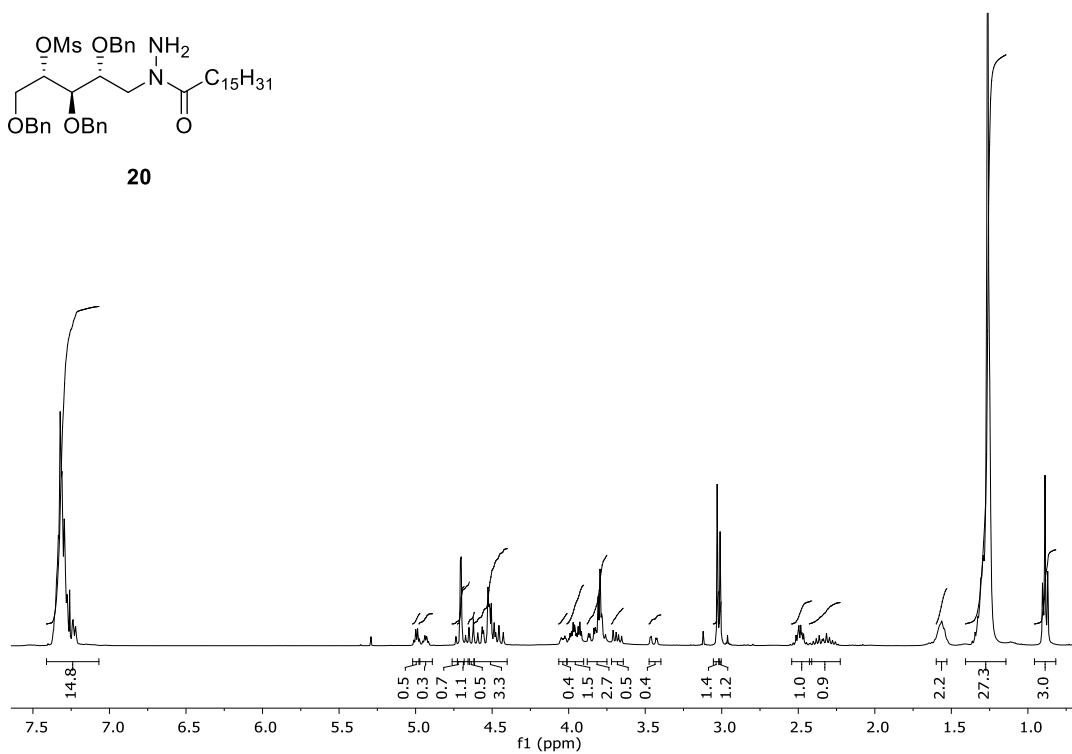

$^{13}\text{C}$  NMR (100 MHz,  $\text{CDCl}_3$ ):

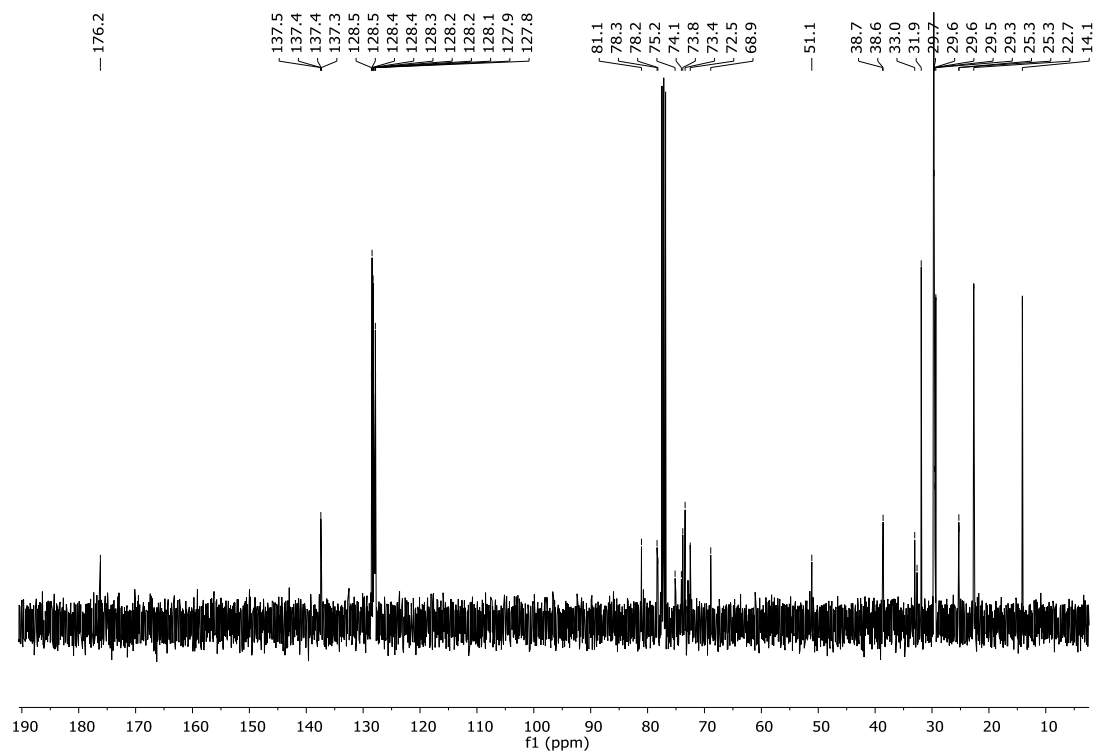



**(3R,4S,5R)-1-N-palmitoyl-3-benzoxymethyl-4,5-di-O-benzyl-4,5-dihydroxyhexahydropyridazine (24):**

<sup>1</sup>H NMR (400 MHz, CDCl<sub>3</sub>):

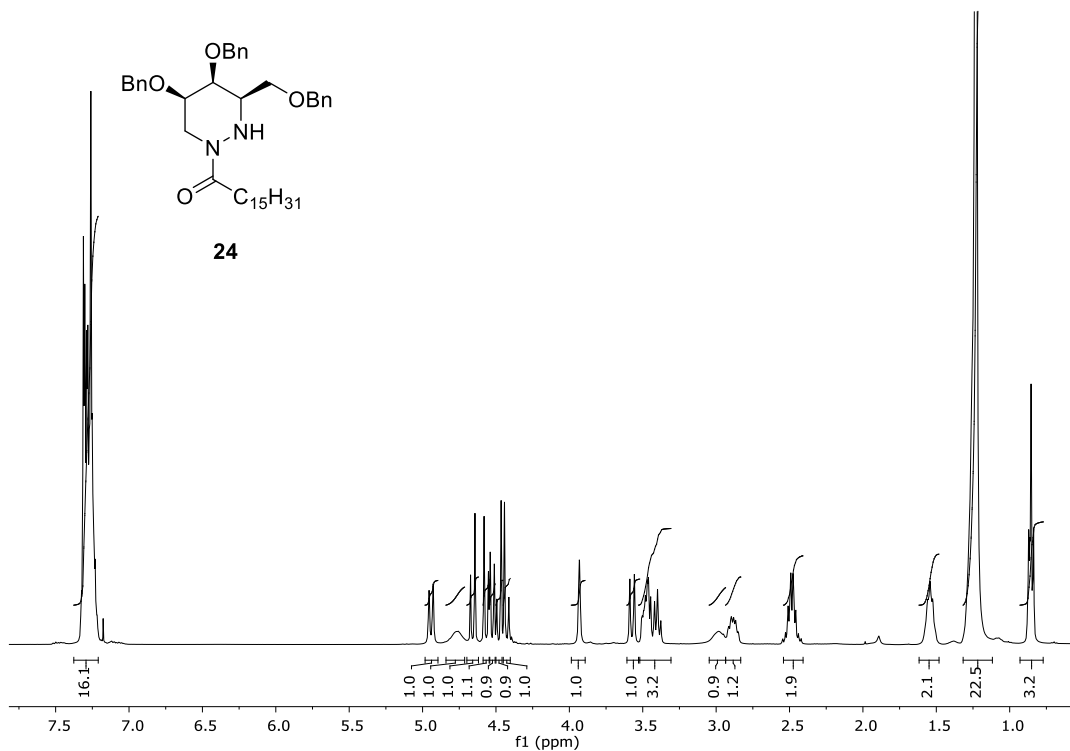

<sup>13</sup>C NMR (100 MHz, CDCl<sub>3</sub>):

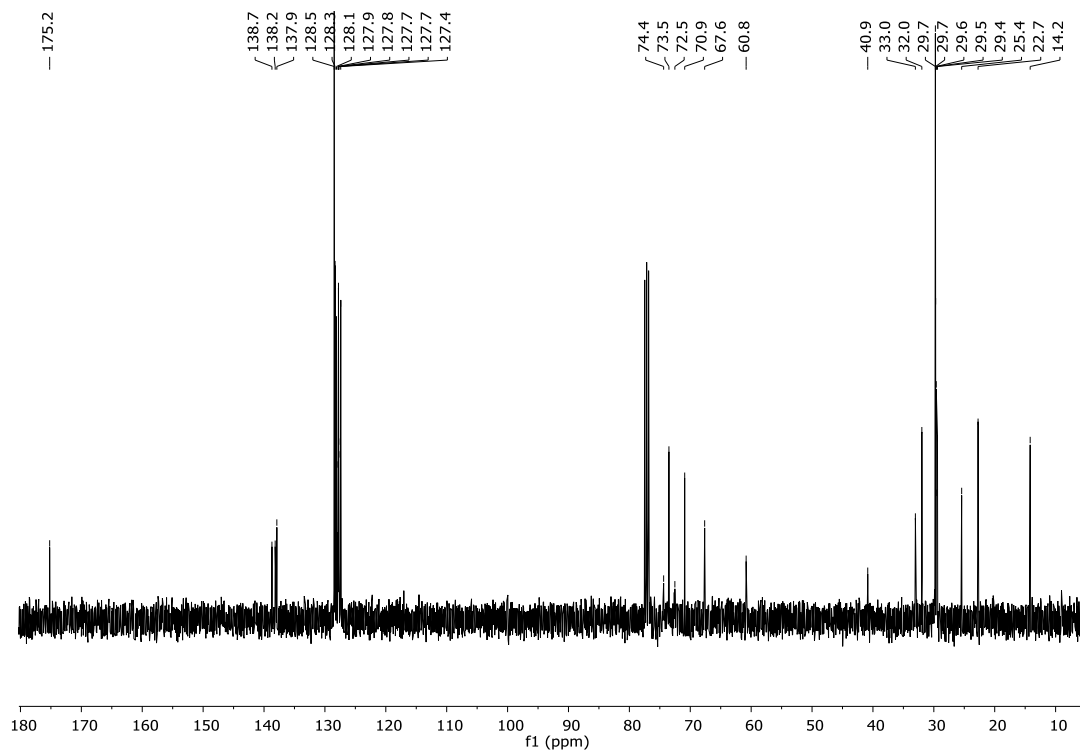

**(3R,4S,5R)-1-N-palmityl-3-benzyloxymethyl-4,5-di-O-benzyl-4,5-dihydroxyhexahydropyridazine (36):**

<sup>1</sup>H NMR (400 MHz, CDCl<sub>3</sub>):

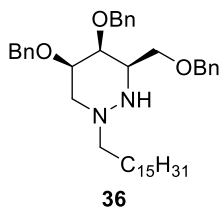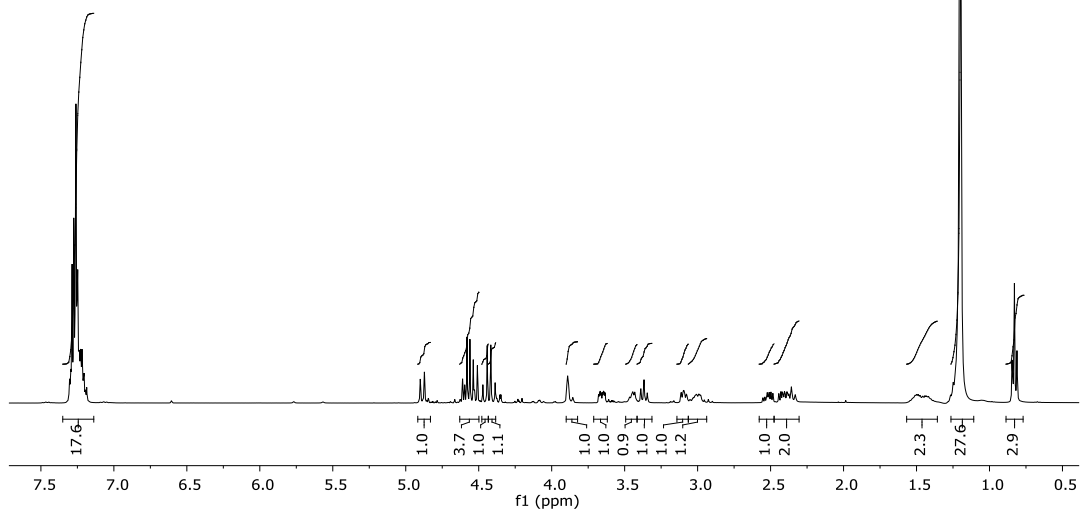

<sup>13</sup>C NMR (100 MHz, CDCl<sub>3</sub>):

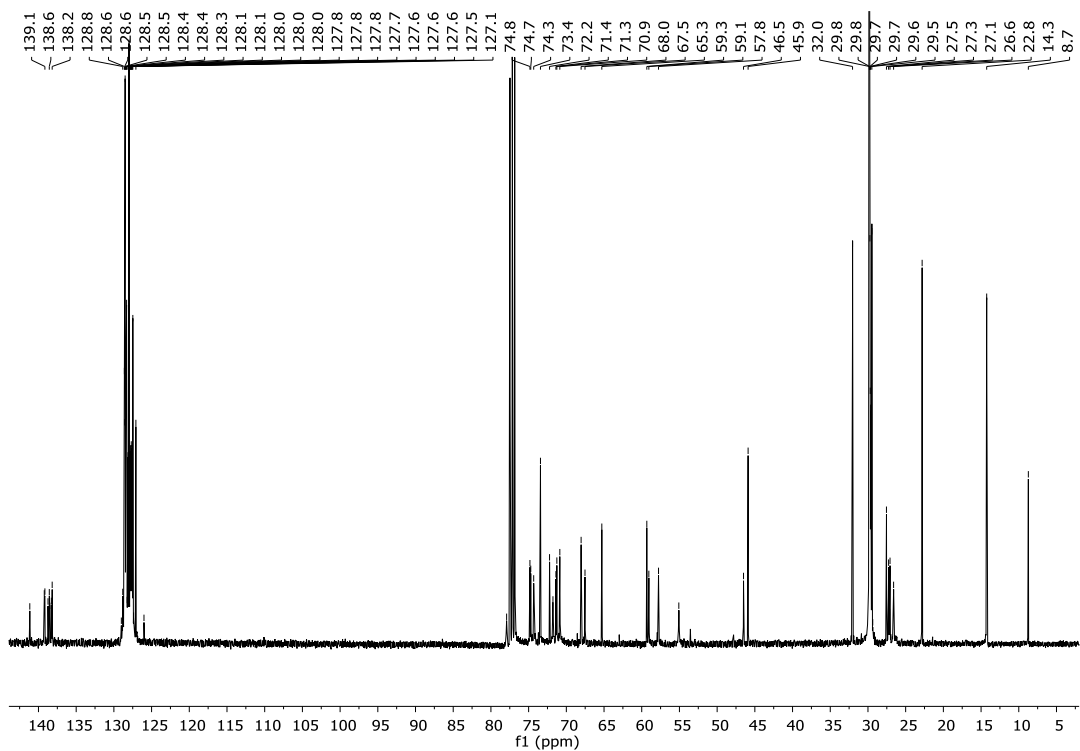

***N*-1-palmityl-azagalactofagomine (27):**

<sup>1</sup>H NMR (400 MHz, 6:4 CD<sub>3</sub>OD:CDCl<sub>3</sub>):

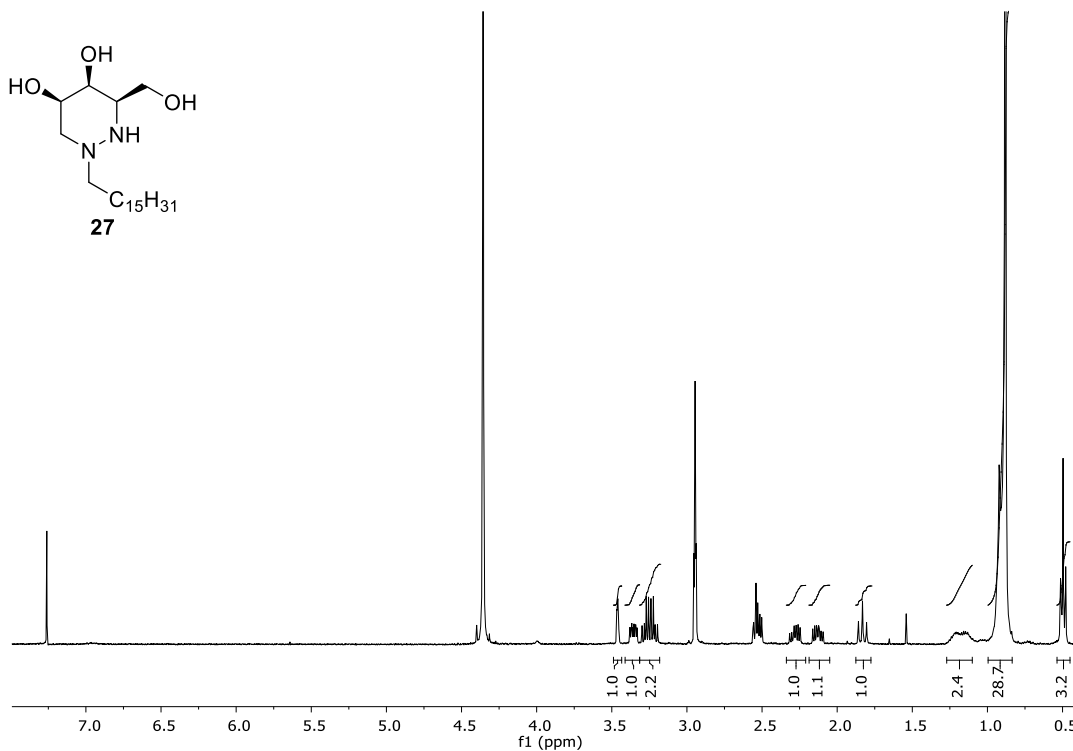

<sup>13</sup>C NMR (100 MHz, 6:4:1 CDCl<sub>3</sub>:CD<sub>3</sub>OD:D<sub>2</sub>O):

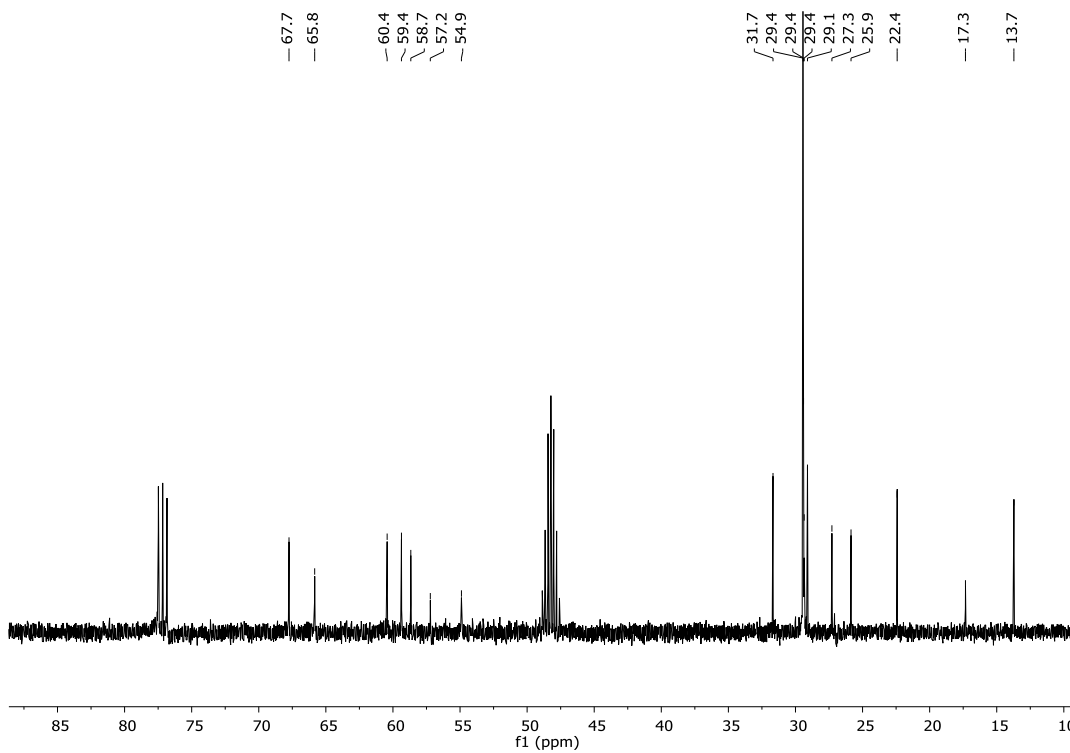

**1-(1-Acetyl-2-butanoyl)hydrazino-1-deoxy-2,3,5-tri-O-benzyl-4-methanesulfonyl-L-ribose (14):**

<sup>1</sup>H NMR (400 MHz, CDCl<sub>3</sub>):

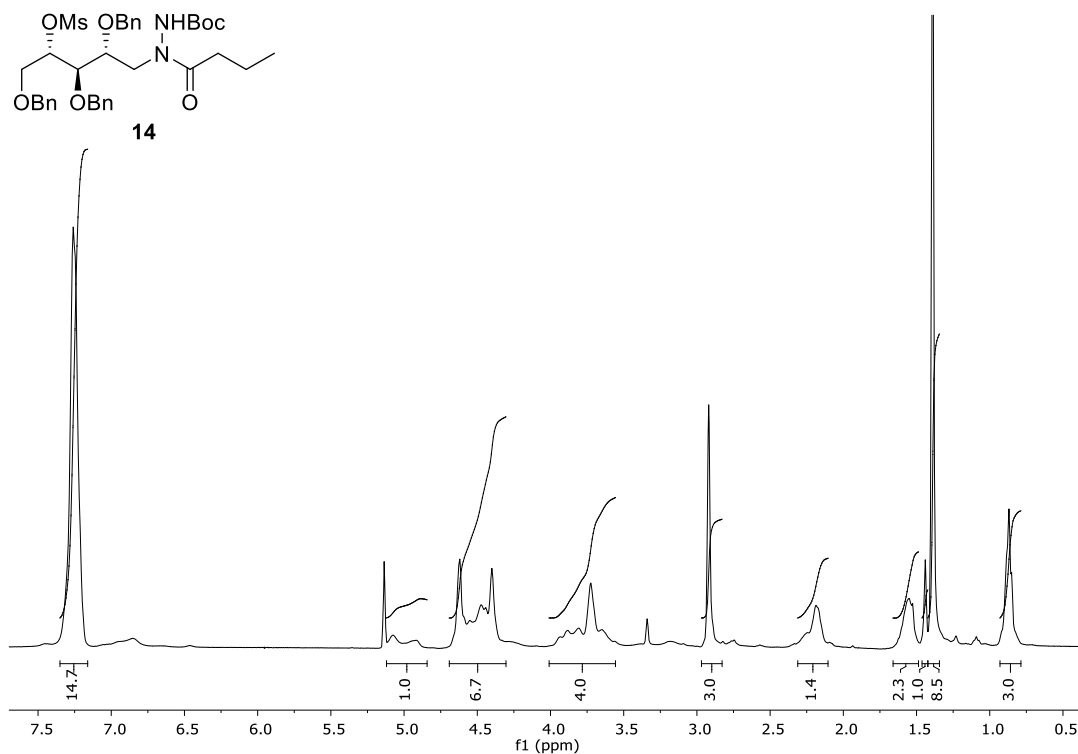

<sup>13</sup>C NMR (100 MHz, CDCl<sub>3</sub>):

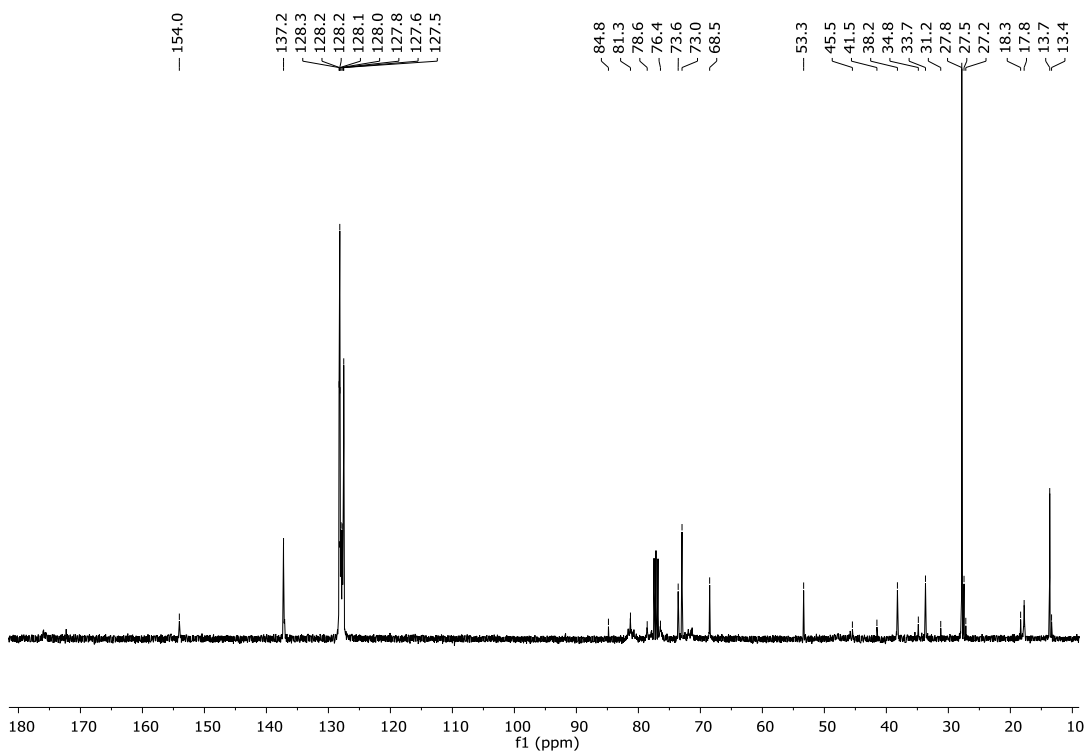

**1-(1-butanoyl)hydrazino-1-deoxy-2,3,5-tri-O-benzyl-4-methanesulfonyl-L-ribose (18):**

<sup>1</sup>H NMR (400 MHz, CDCl<sub>3</sub>):

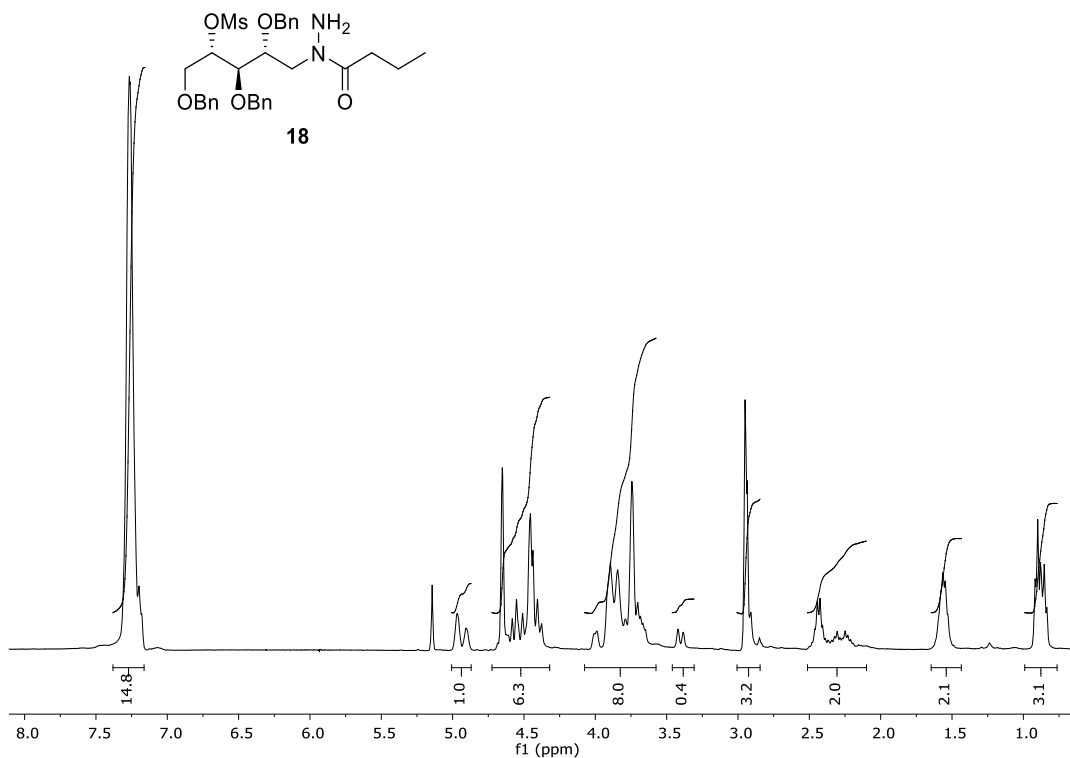

<sup>13</sup>C NMR (100 MHz, CDCl<sub>3</sub>):

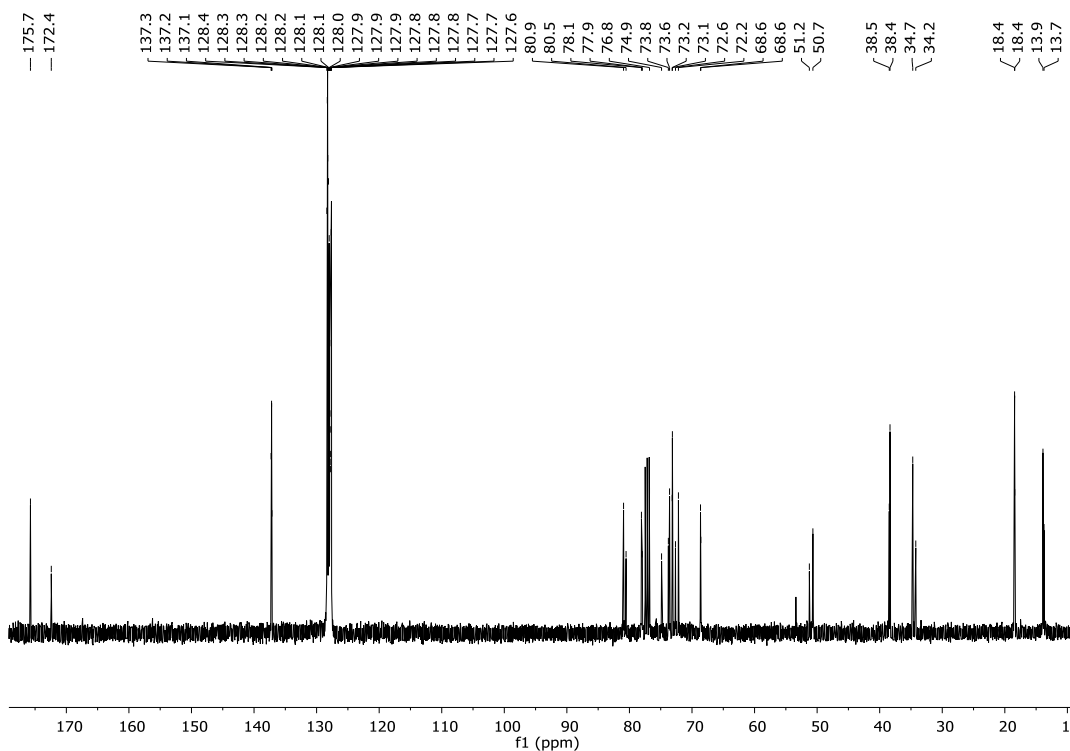

**(3R,4S,5R)-1-N-butanoyl-3-benzyloxymethyl-4,5-di-O-benzyl-4,5-dihydroxyhexahydropyridazine (22):**

<sup>1</sup>H-NMR (400 MHz, CDCl<sub>3</sub>):

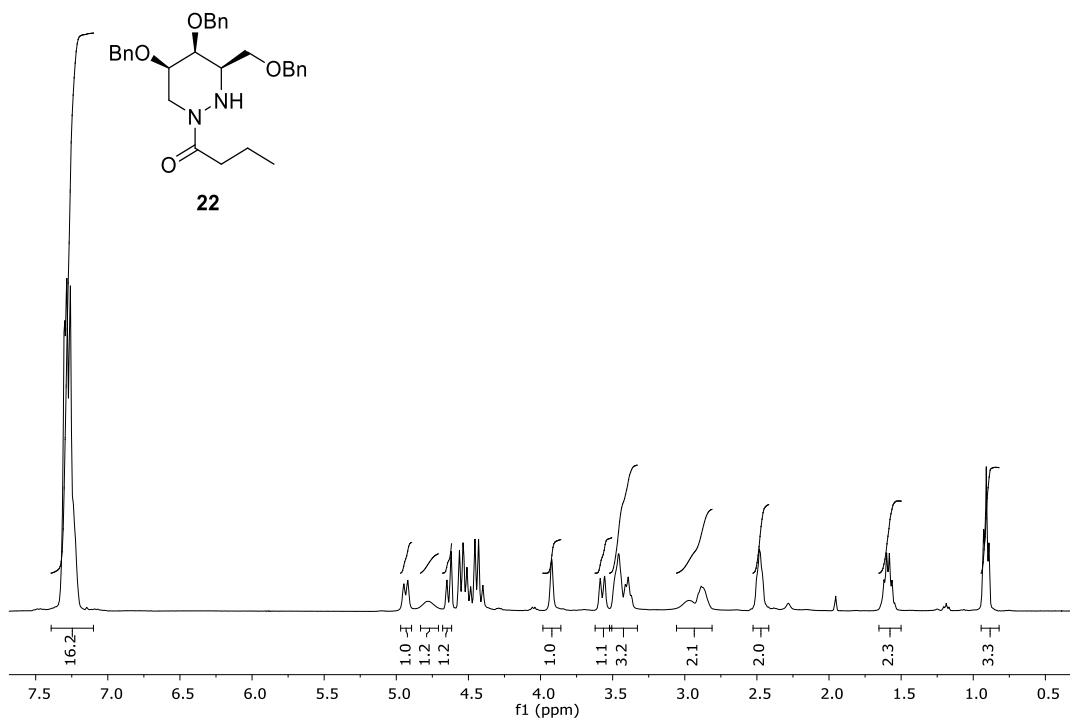

<sup>13</sup>C-NMR (100 MHz, CDCl<sub>3</sub>):

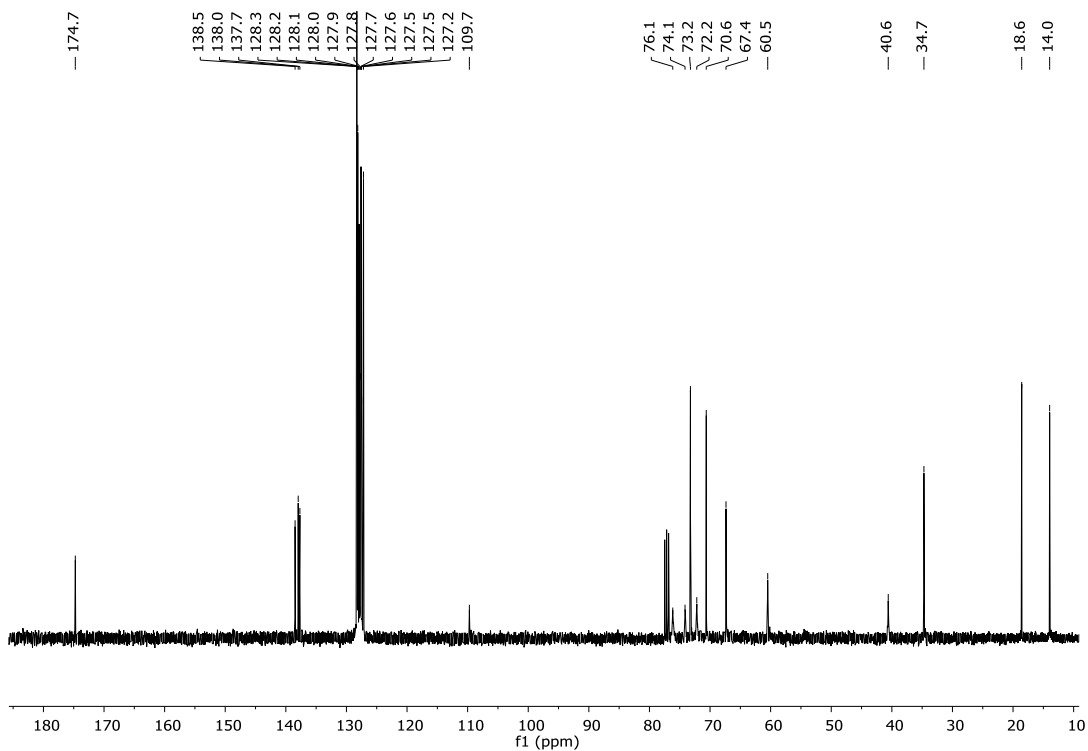

**(3R,4S,5R)-1-N-butanyl-3-benzyloxymethyl-4,5-di-O-benzyl-4,5-dihydroxyhexahydropyridazine (37):**

<sup>1</sup>H NMR (400 MHz, CDCl<sub>3</sub>):

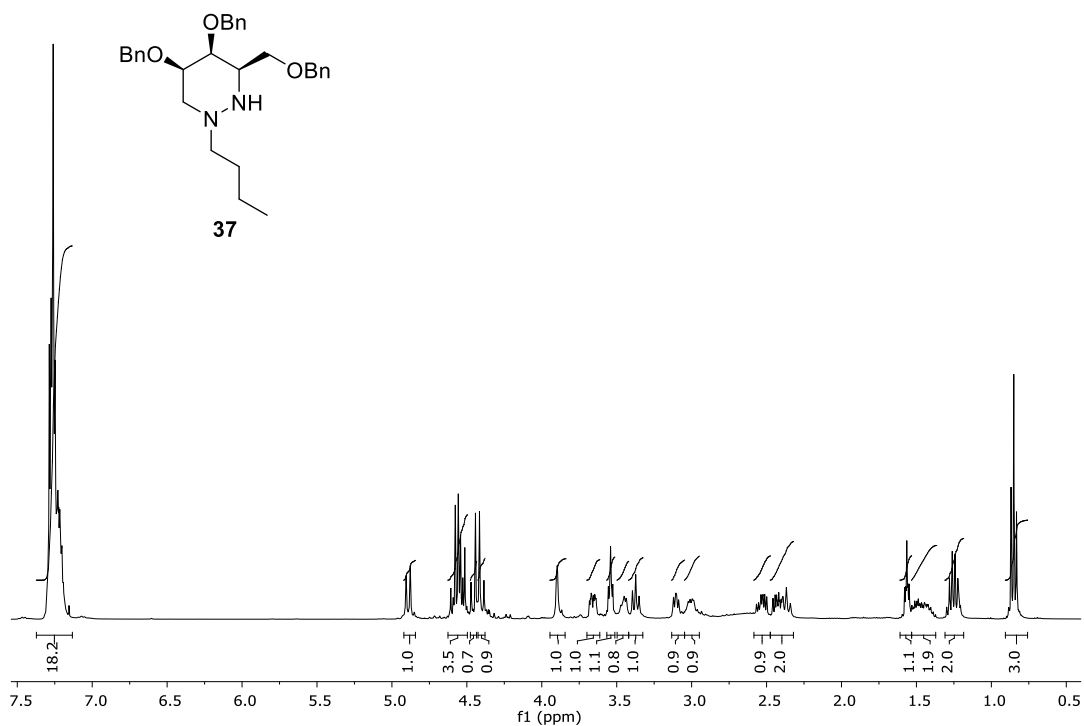

<sup>13</sup>C-NMR (100 MHz, CDCl<sub>3</sub>):

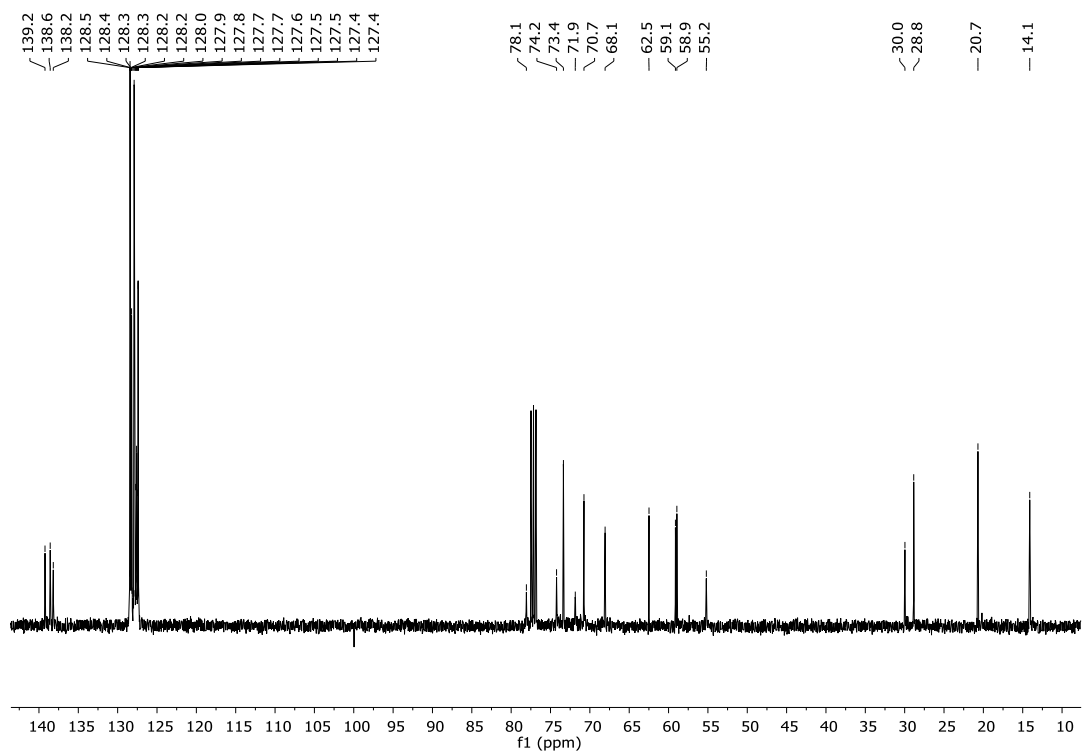

***N*-1-butyl-azagalactofagomine (4):**

<sup>1</sup>H-NMR (400 MHz, CD<sub>3</sub>OD):

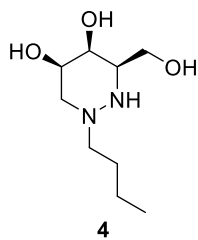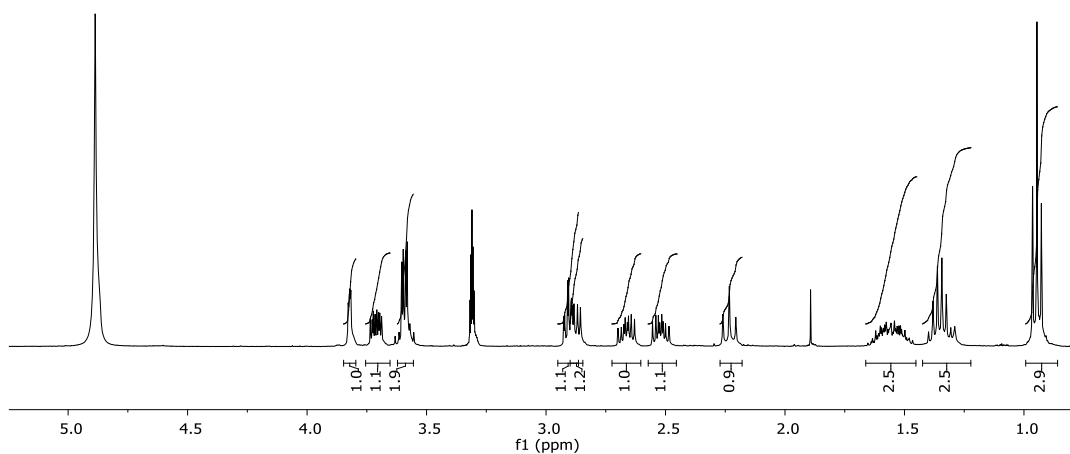

<sup>13</sup>C-NMR (100 MHz, CD<sub>3</sub>OD):

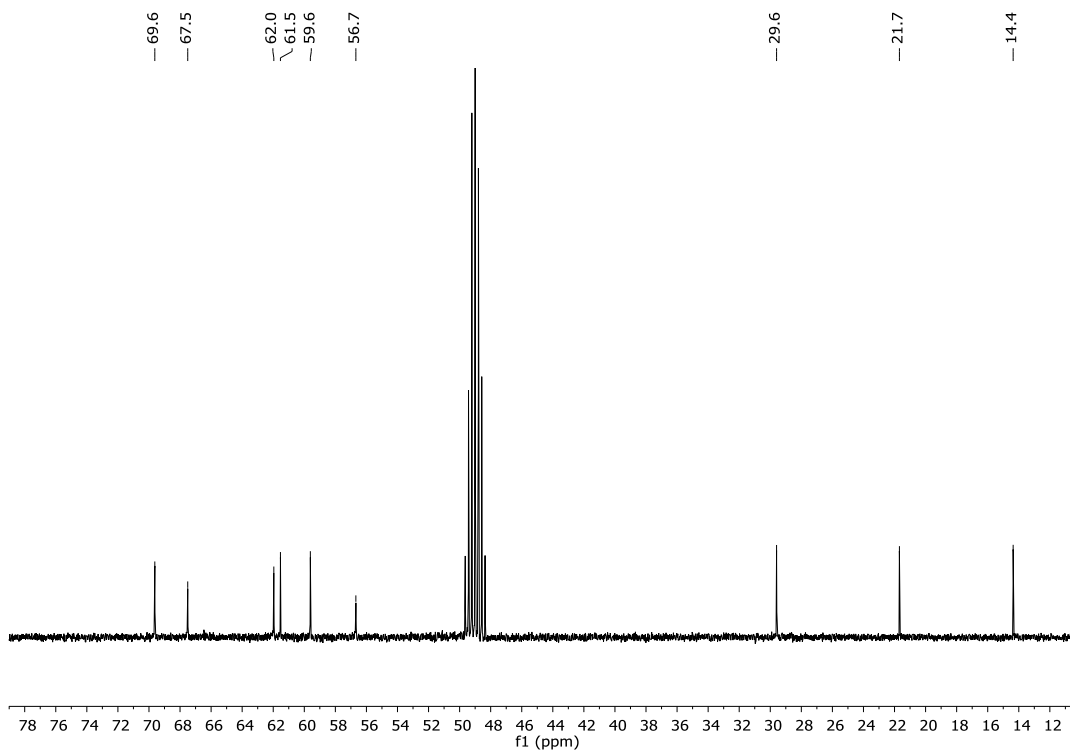



**1-(1-octanoyl-2-*tert*-butyloxycarbonyl)hydrazino-1-deoxy-2,3,5-tri-*O*-benzyl-4-methanesulfonyl-L-ribose (15):**

<sup>1</sup>H-NMR (400 MHz, CDCl<sub>3</sub>):

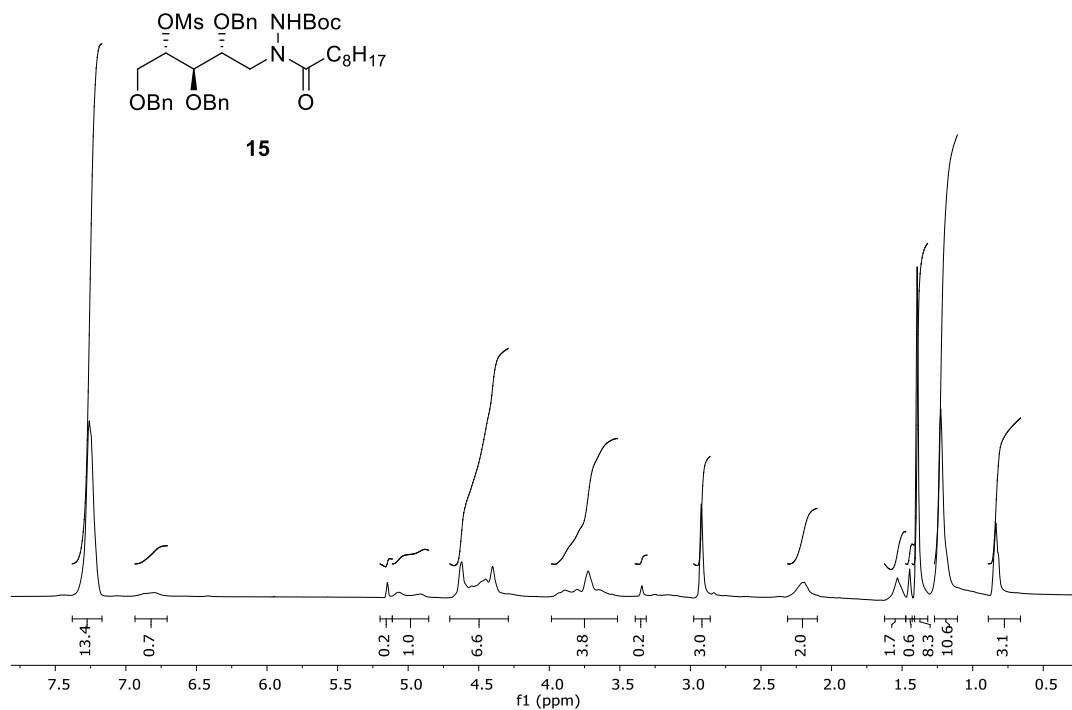

<sup>13</sup>C-NMR (100 MHz, CDCl<sub>3</sub>):

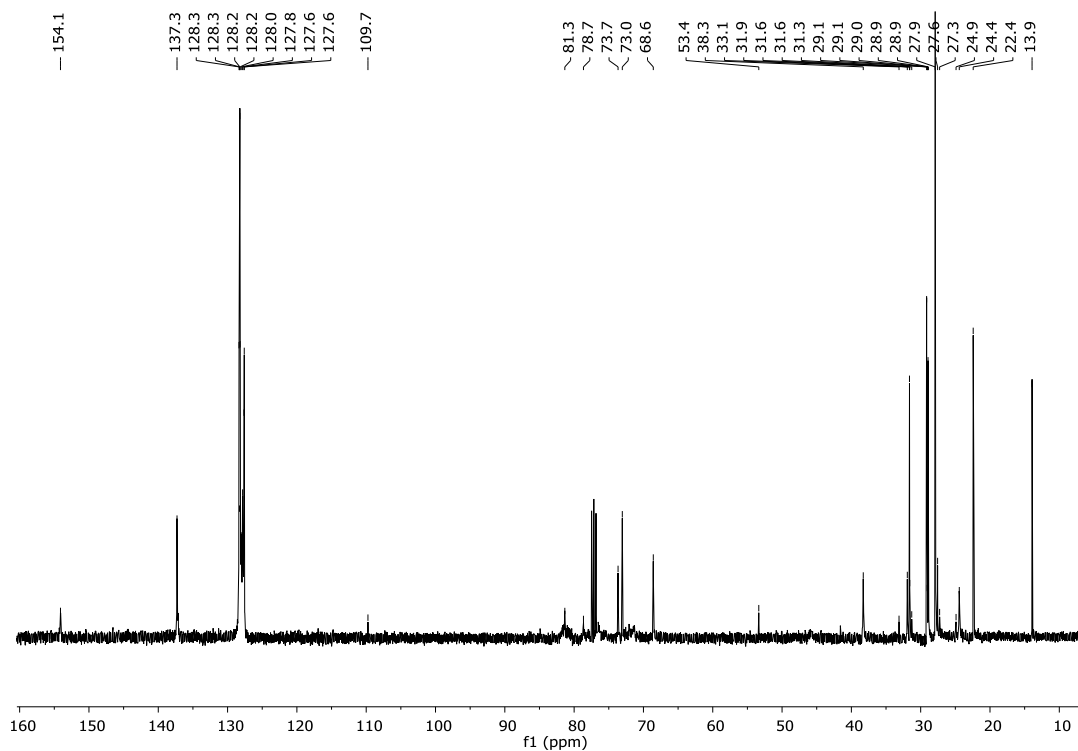

**1-(1-nonanoyl)hydrazino-1-deoxy-2,3,5-tri-O-benzyl-4-methanesulfonyl-L-ribose (19):**

<sup>1</sup>H-NMR (400 MHz, CDCl<sub>3</sub>):

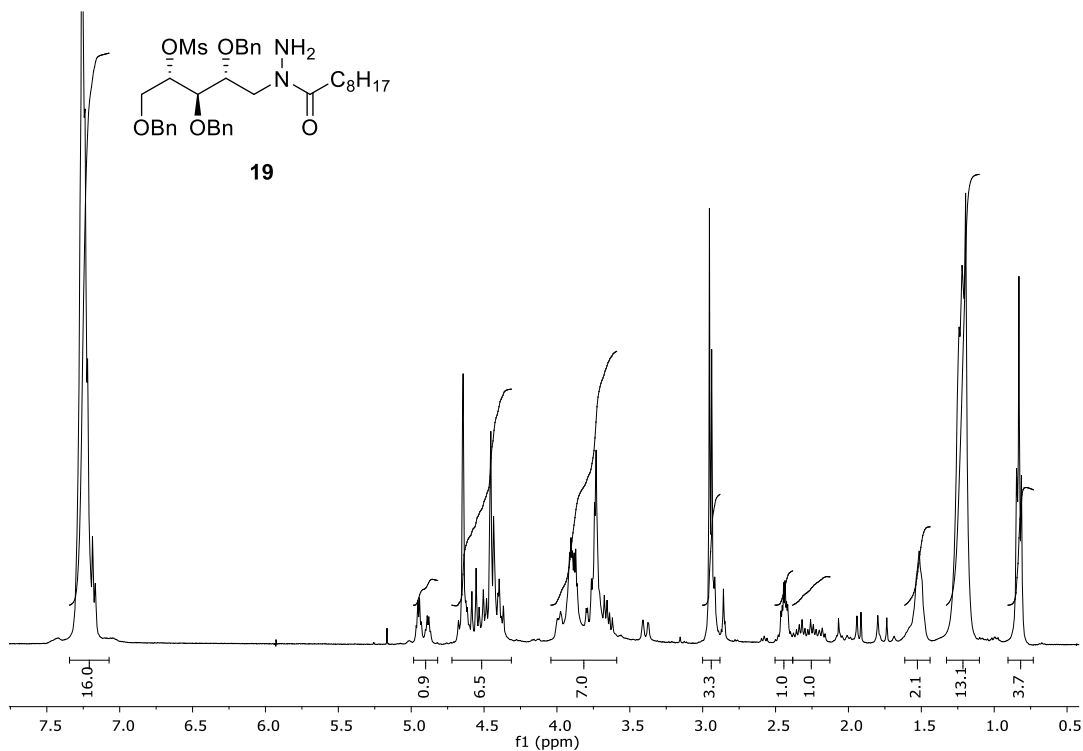

<sup>13</sup>C-NMR (100 MHz, CDCl<sub>3</sub>):

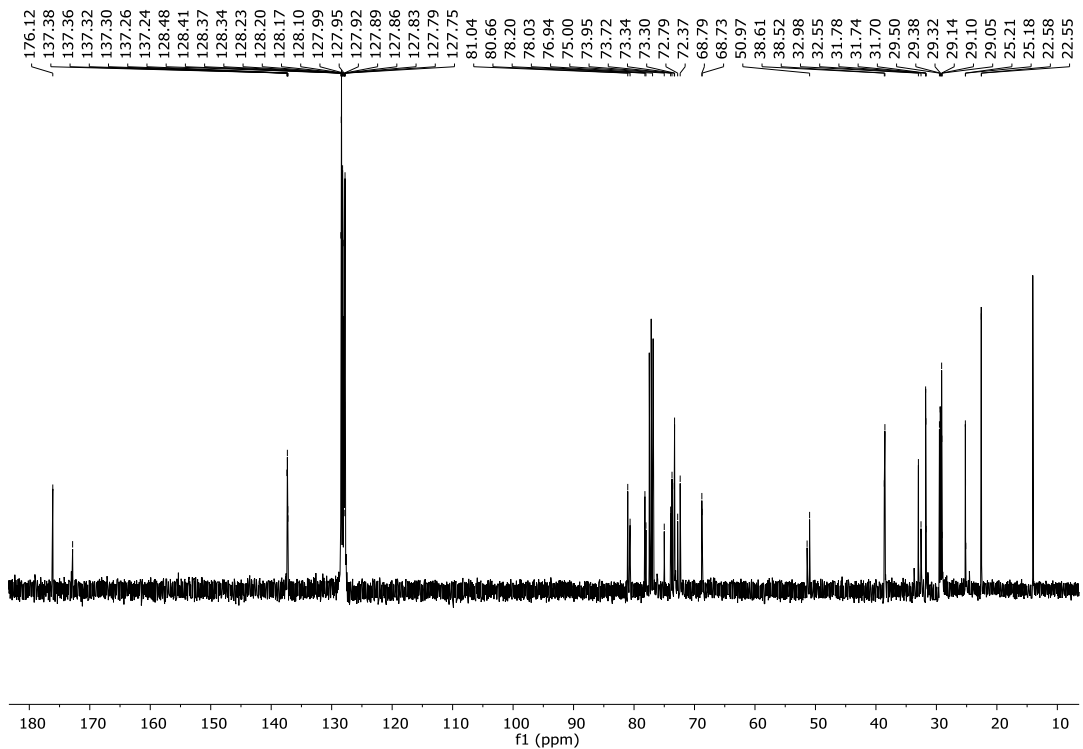

**(3*R*,4*S*,5*R*)-1-*N*-nonanoyl-3-benzyloxymethyl-4,5-di-*O*-benzyl-4,5-dihydroxyhexahydropyridazine (23):**

<sup>1</sup>H-NMR (400 MHz, CDCl<sub>3</sub>):

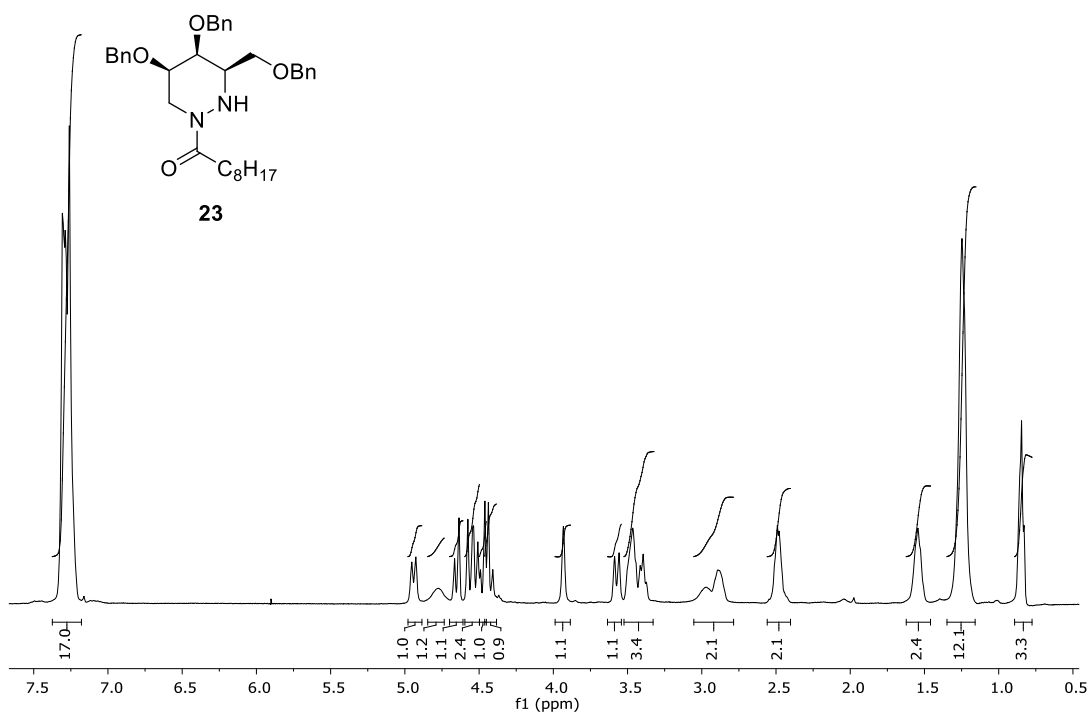

<sup>13</sup>C-NMR (100 MHz, CDCl<sub>3</sub>):

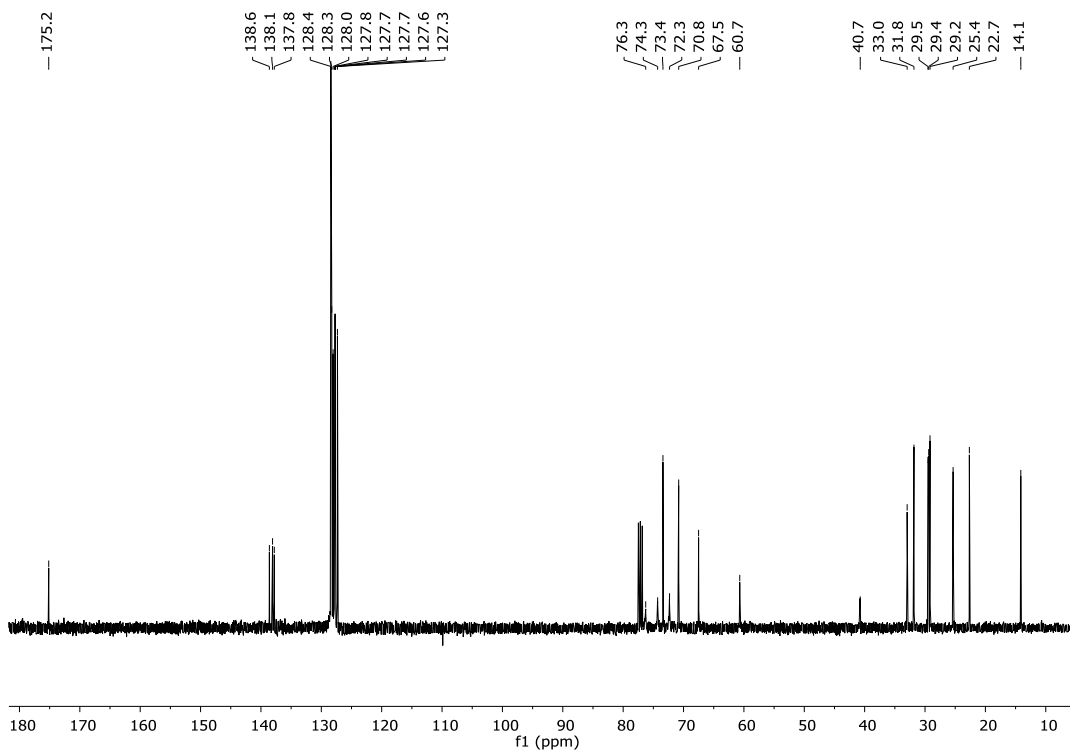

**(3R,4S,5R)-1-N-nonyl-3-benzyloxymethyl-4,5-di-O-benzyl-4,5-dihydroxyhexahydropyridazine (38):**

<sup>1</sup>H-NMR (400 MHz, CDCl<sub>3</sub>):

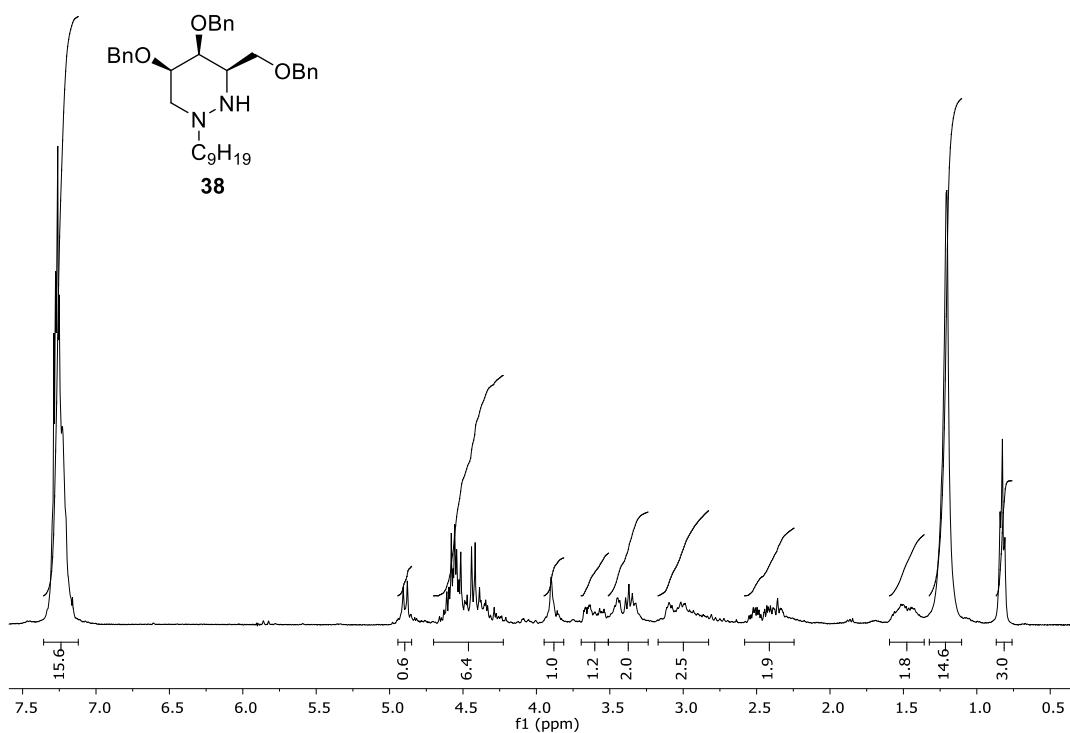

<sup>13</sup>C-NMR (100 MHz, CDCl<sub>3</sub>):

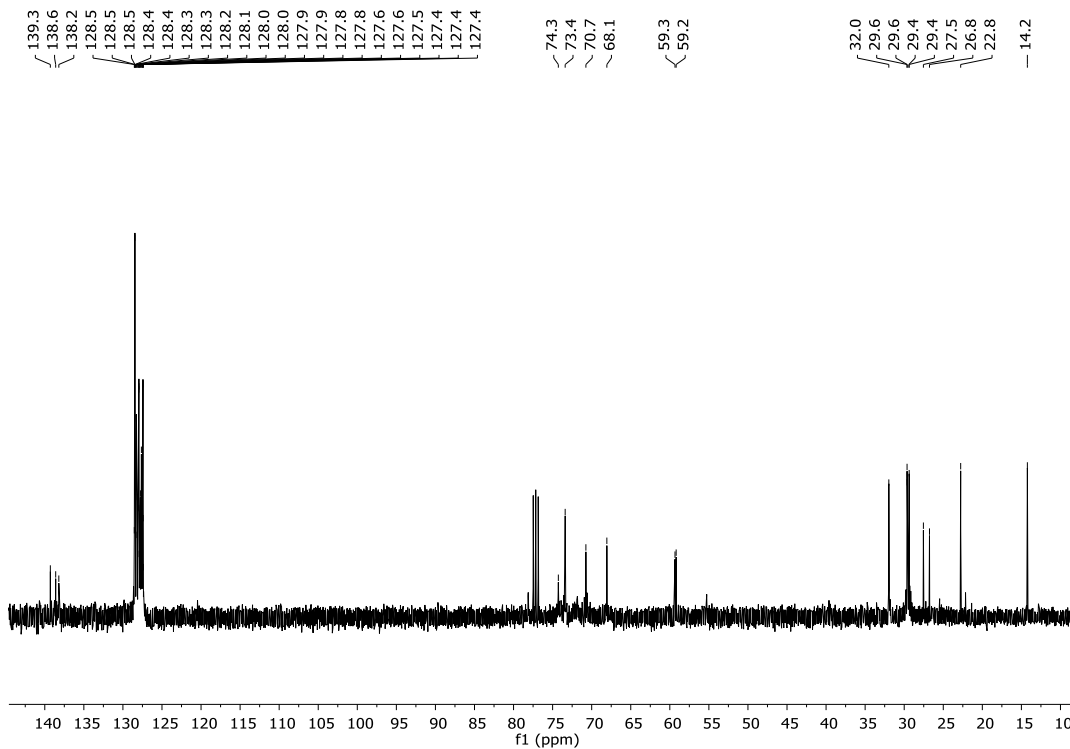

***N*-1-nonyl-azagalactofagomine (26):**

<sup>1</sup>H-NMR (400 MHz, CD<sub>3</sub>OD):

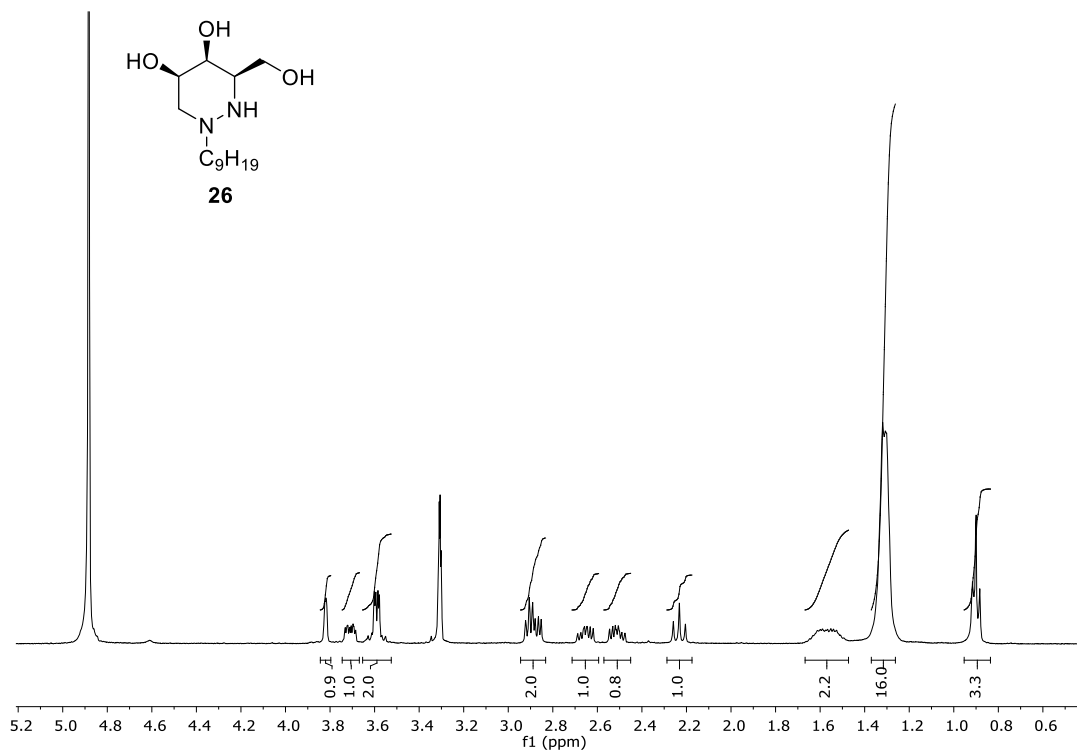

<sup>13</sup>C NMR (100 MHz, CD<sub>3</sub>OD):

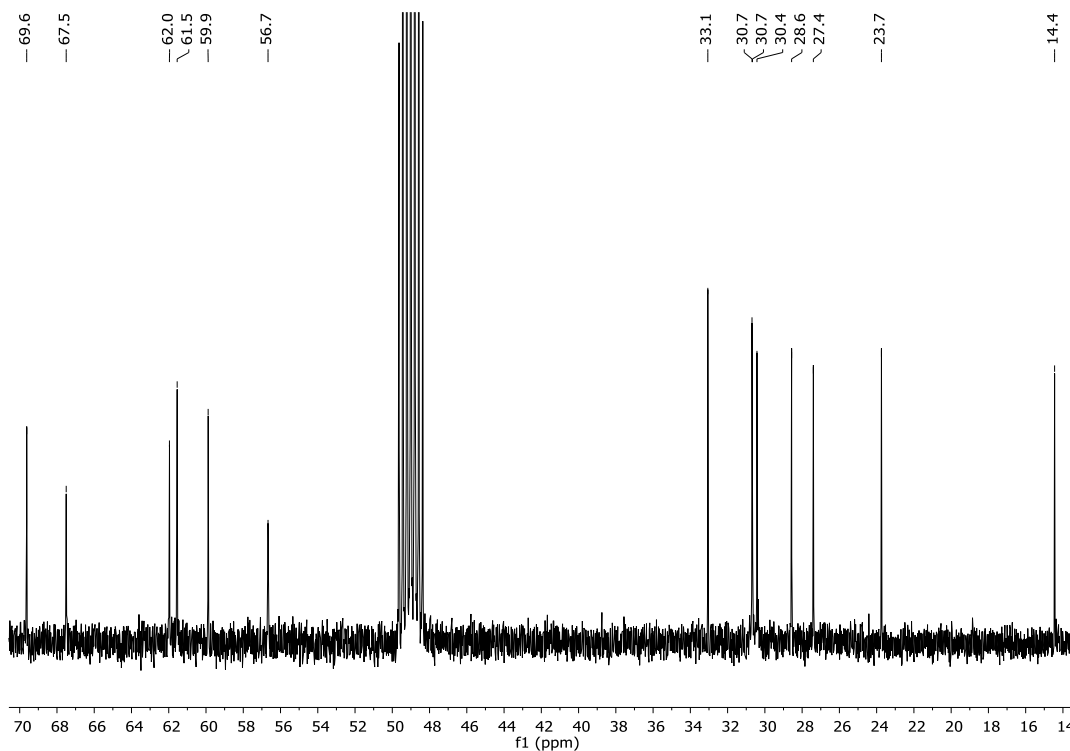

**1-(1-phenethanoyl-2-*tert*-butyloxycarbonyl)hydrazino-1-deoxy-2,3,5-tri-*O*-benzyl-4-hydroxy-L-ribose (39):**

<sup>1</sup>H-NMR (400 MHz, CDCl<sub>3</sub>):

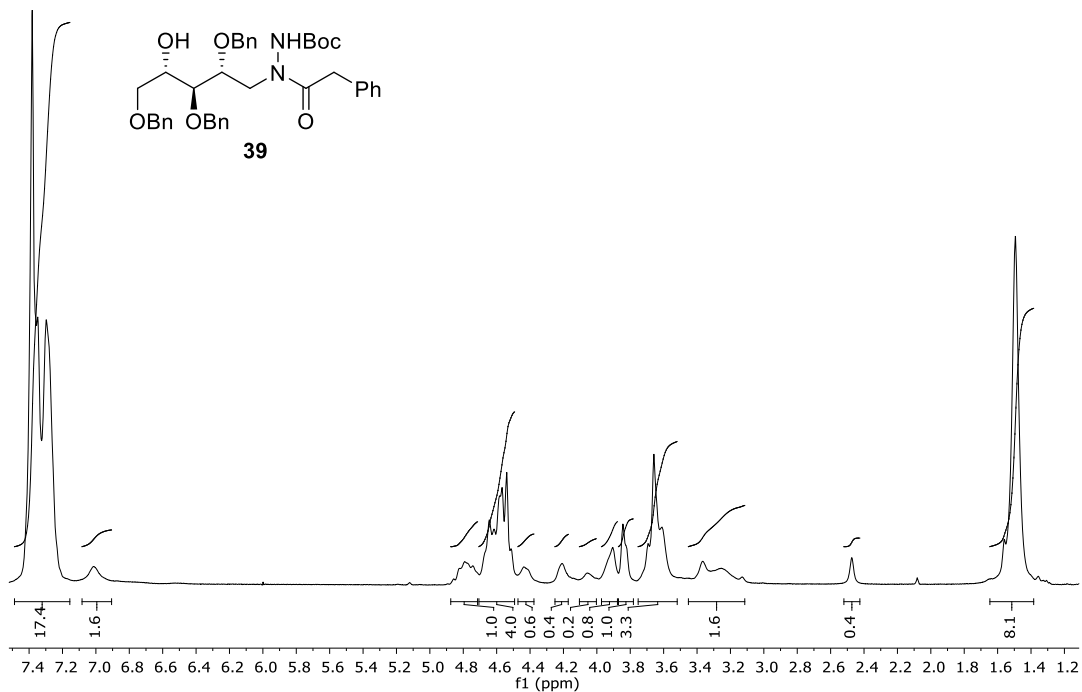

<sup>13</sup>C-NMR (100 MHz, CDCl<sub>3</sub>):

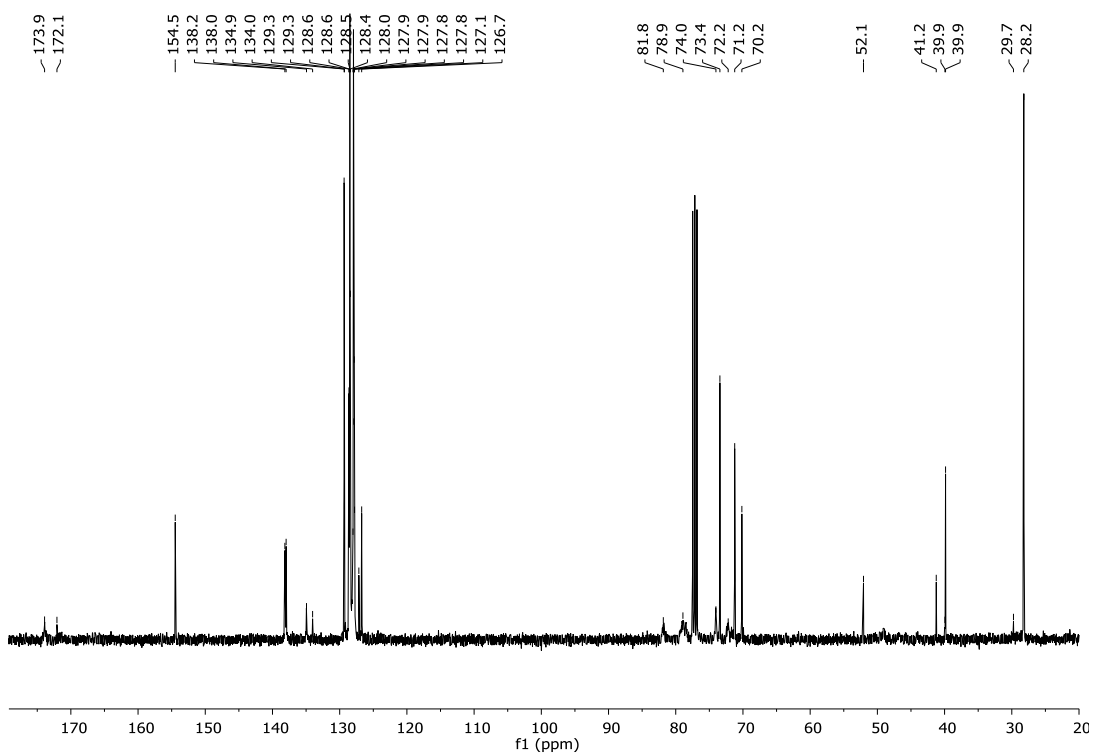

**1-(1-phenethanoyl-2-*tert*-butyloxycarbonyl)hydrazino-1-deoxy-2,3,5-tri-*O*-benzyl-4-methanesulfonyl-L-ribose (17):**

$^1\text{H-NMR}$  (400 MHz,  $\text{CDCl}_3$ ):

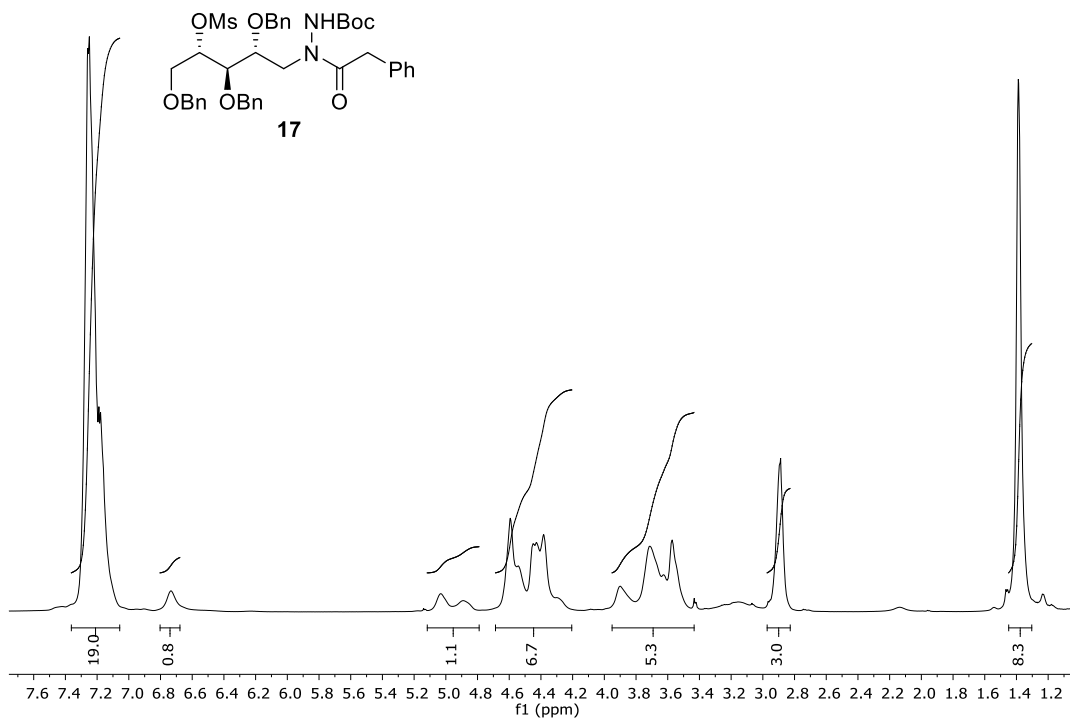

$^{13}\text{C-NMR}$  (100 MHz,  $\text{CDCl}_3$ ):

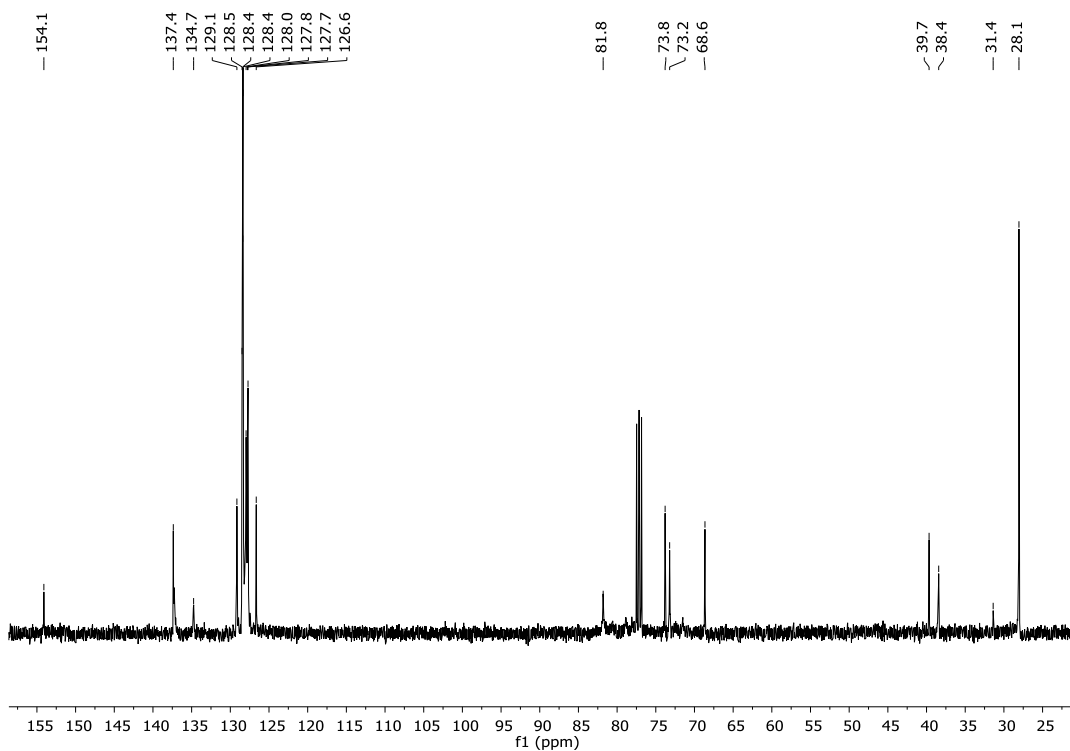

**1-(1-phenethanoyl)hydrazino-1-deoxy-2,3,5-tri-O-benzyl-4-methanesulfonyl-L-ribose (21):**

<sup>1</sup>H-NMR (400 MHz, CDCl<sub>3</sub>):

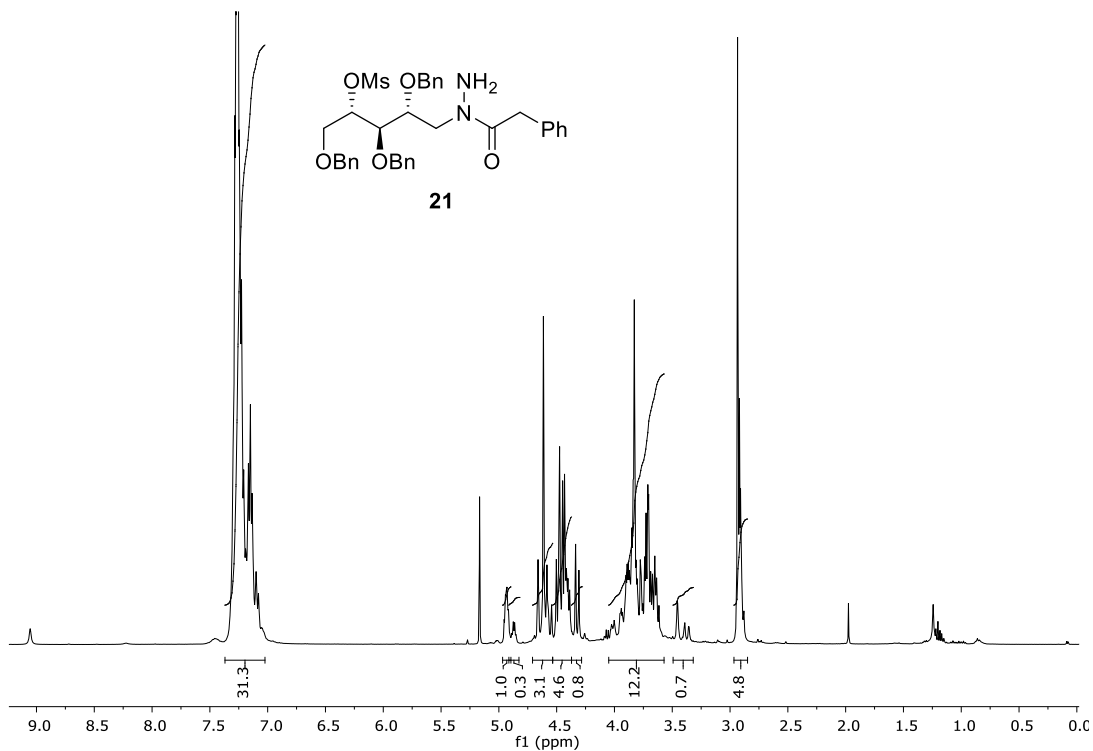

<sup>13</sup>C NMR (100 MHz, CDCl<sub>3</sub>):

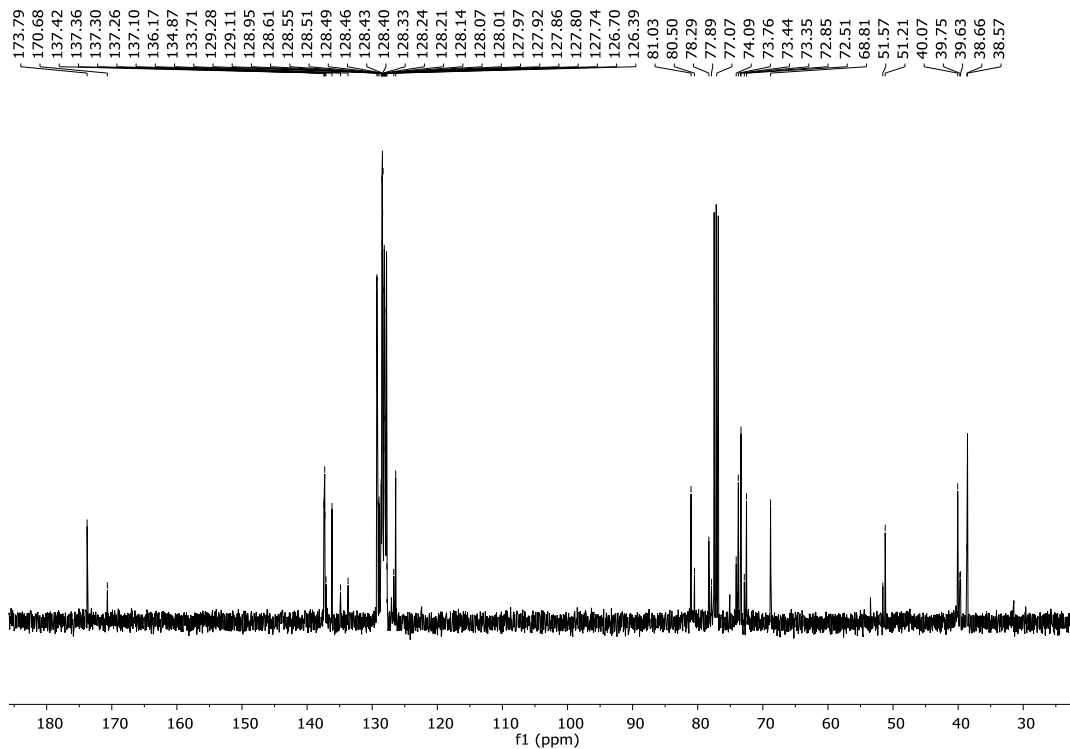



**(3R,4S,5R)-1-N-phenethanoyl-3-benzyloxymethyl-4,5-di-O-benzyl-4,5-dihydroxyhexahydropyridazine (25):**

<sup>1</sup>H-NMR (400 MHz, CDCl<sub>3</sub>):

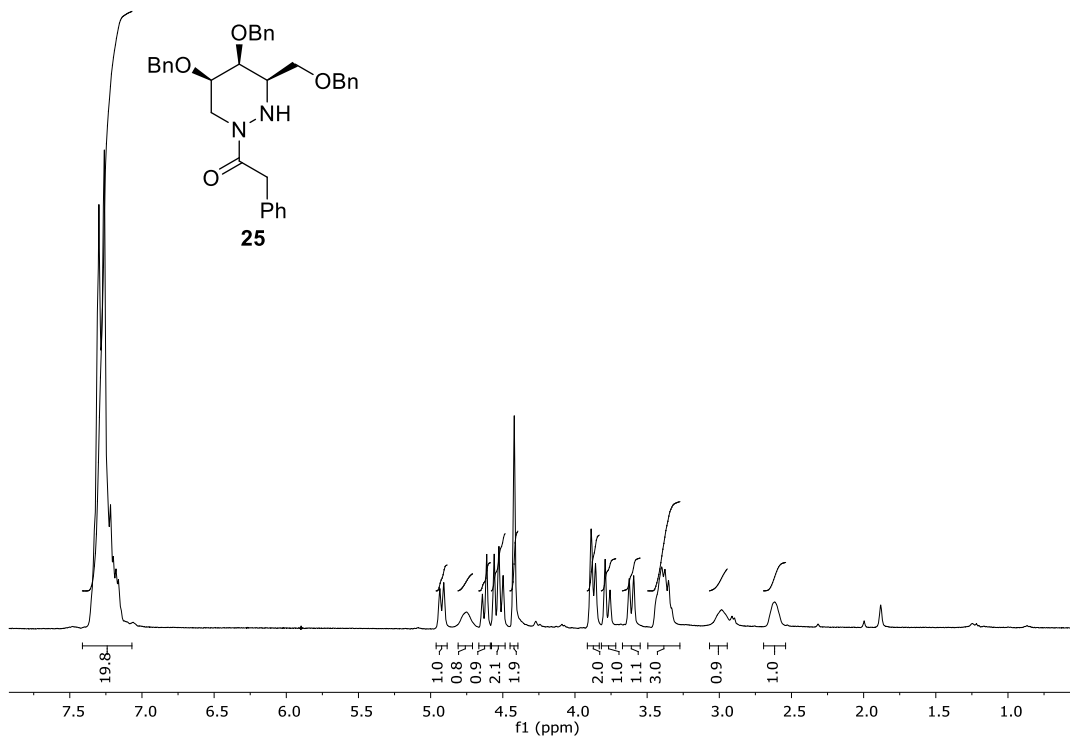

<sup>13</sup>C NMR (100 MHz, CDCl<sub>3</sub>):

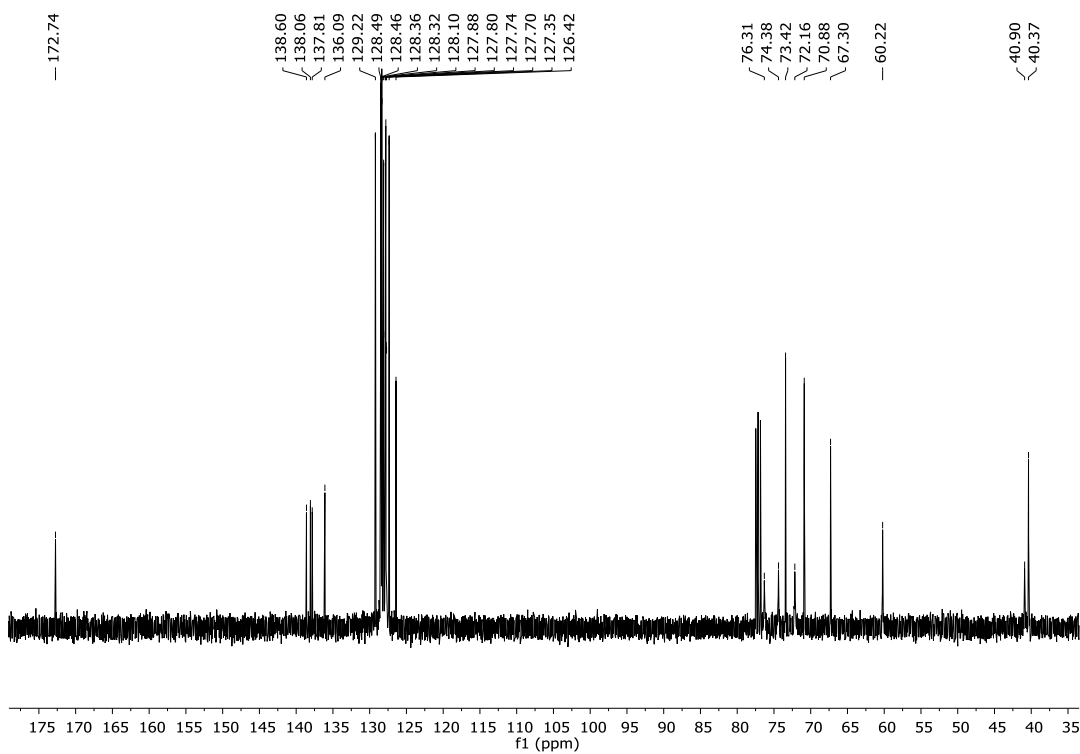

**(3*R*,4*S*,5*R*)-1-*N*-phenethyl-3-benzyloxymethyl-4,5-di-*O*-benzyl-4,5-dihydroxyhexahydropyridazine (40):**

<sup>1</sup>H-NMR (400 MHz, CDCl<sub>3</sub>):

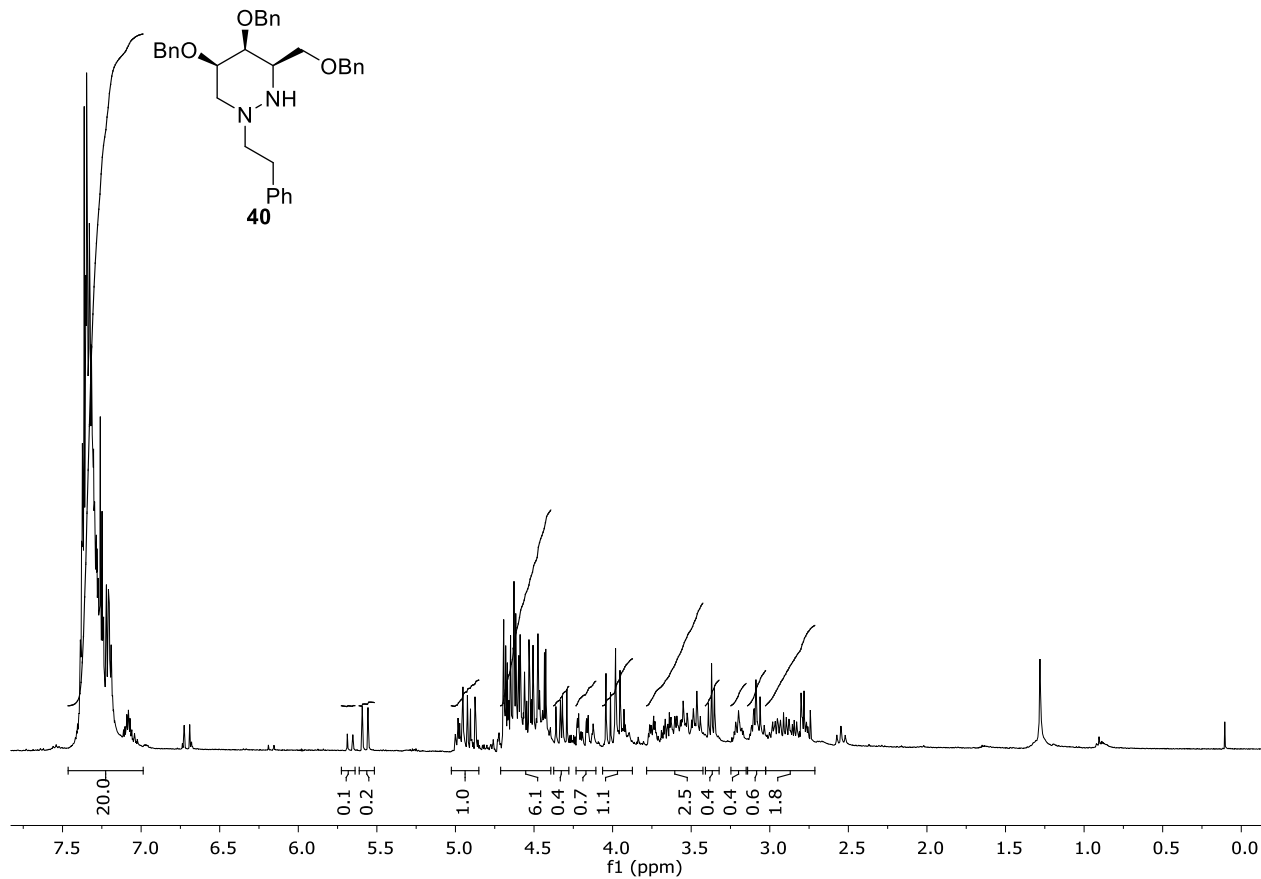

**1-N-phenethyl-azagalactofagomine (28):**

<sup>1</sup>H-NMR (400 MHz, CD<sub>3</sub>OD):

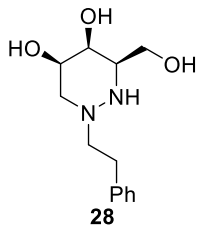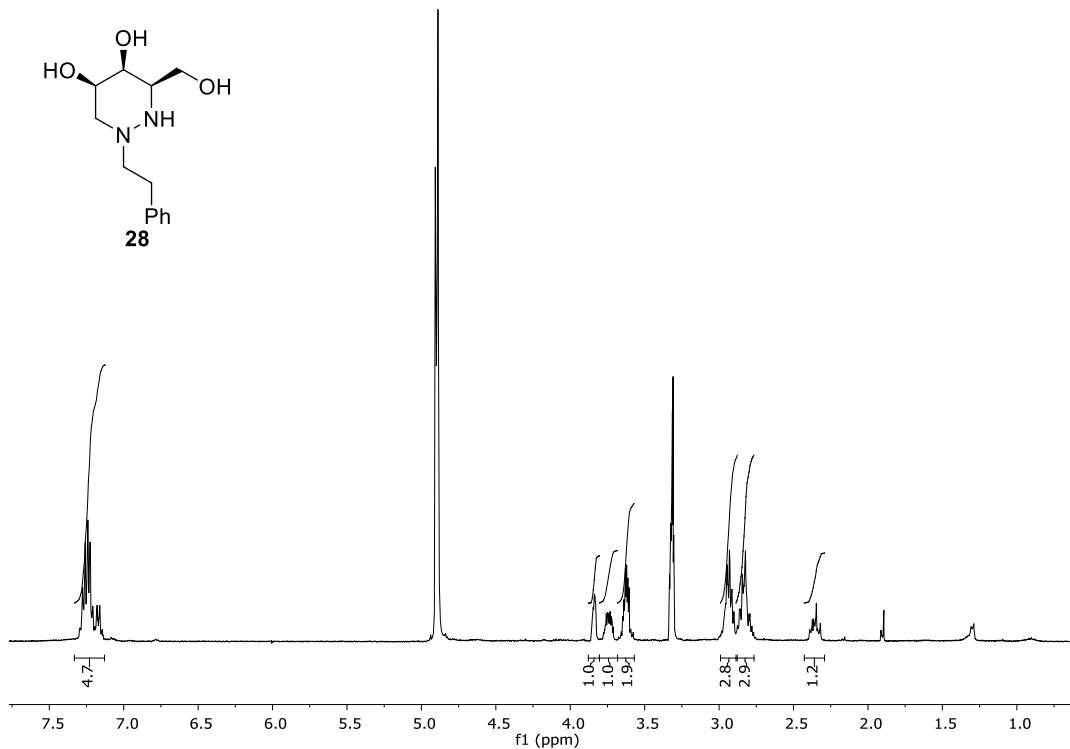

<sup>13</sup>C-NMR (100 MHz, CD<sub>3</sub>OD):

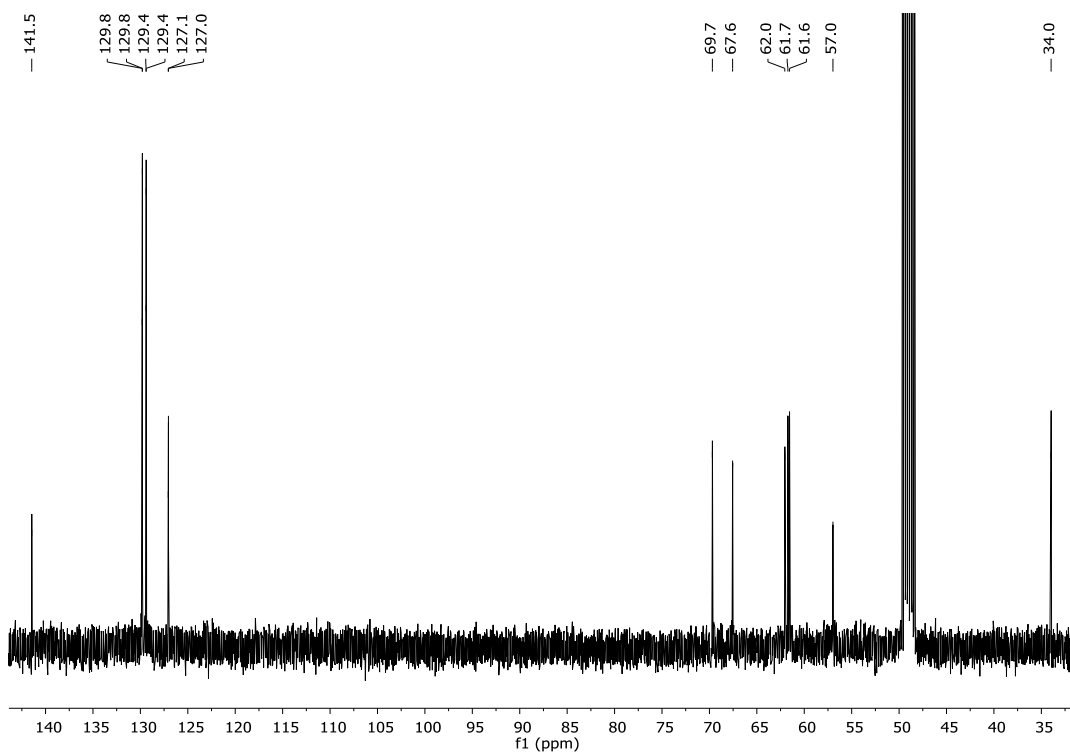

**1-(1-Acetyl-2-*tert*-butyloxycarbonyl)hydrazino-1-deoxy-2,3,5-tri-*O*-benzyl-L-ribose (41)**

<sup>1</sup>H-NMR (400 MHz, CDCl<sub>3</sub>)

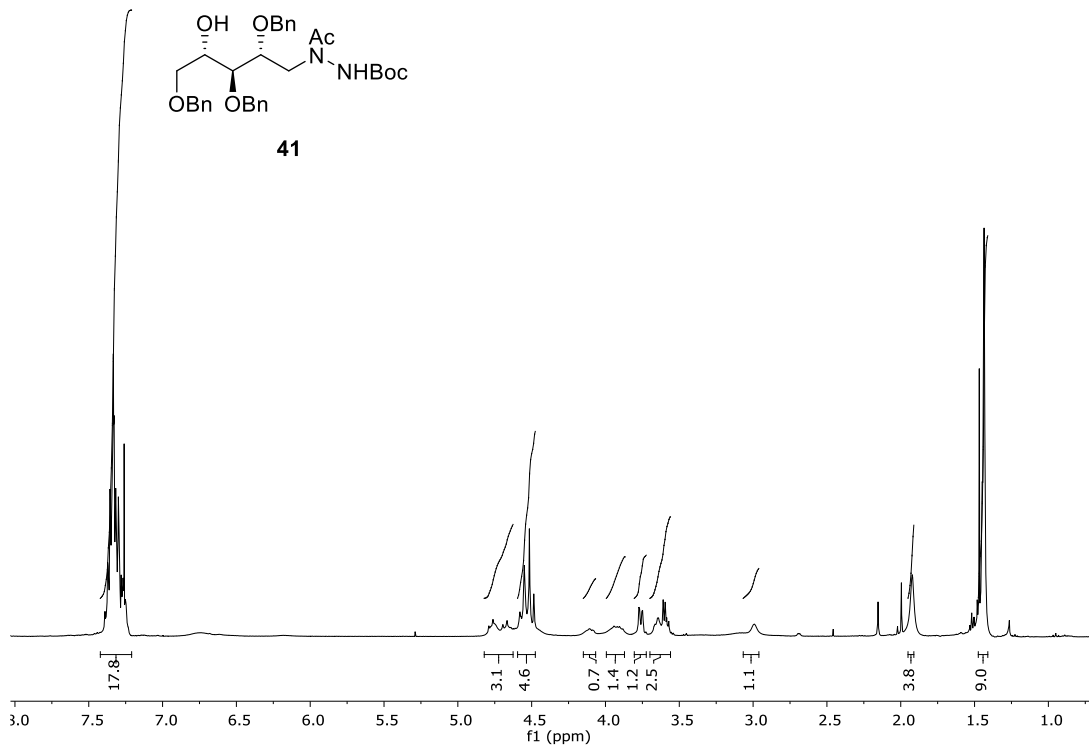

<sup>13</sup>C-NMR (100 MHz, CDCl<sub>3</sub>)

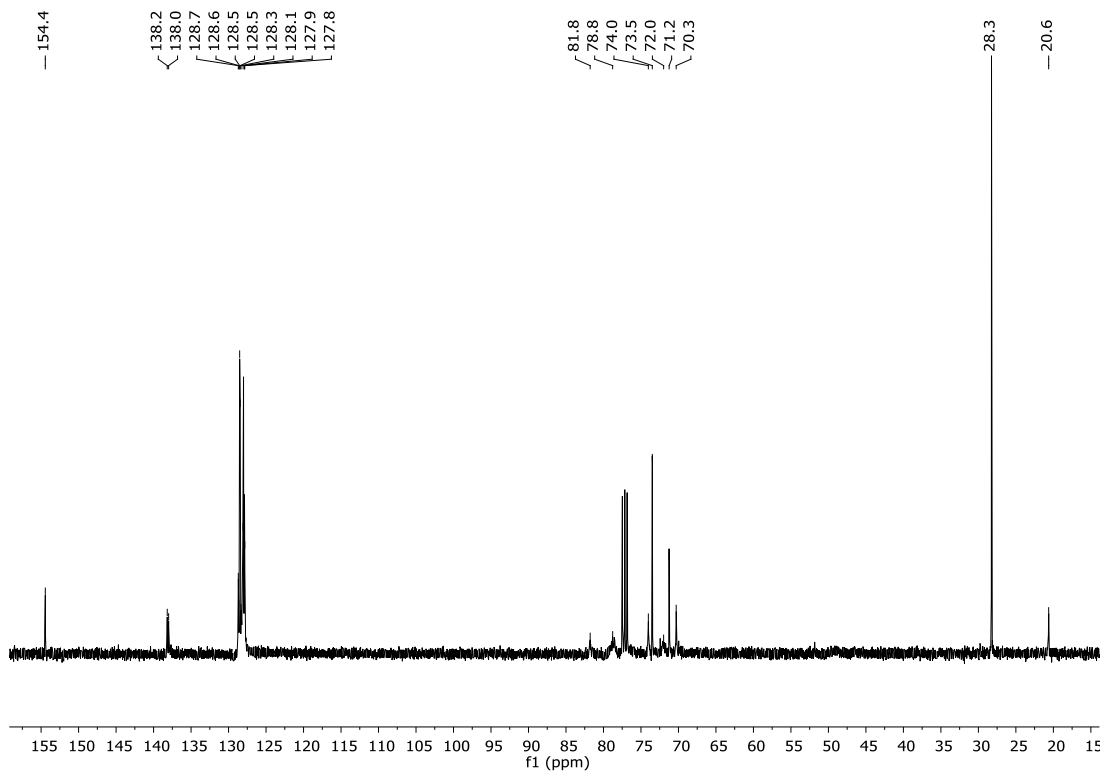

**1-(1-Acetyl-2-*tert*-butyloxycarbonyl)hydrazino-1-deoxy-2,3,5-tri-*O*-benzyl-4-methanesulfonyl-L-ribose (29):**

<sup>1</sup>H-NMR (400 MHz, CDCl<sub>3</sub>)

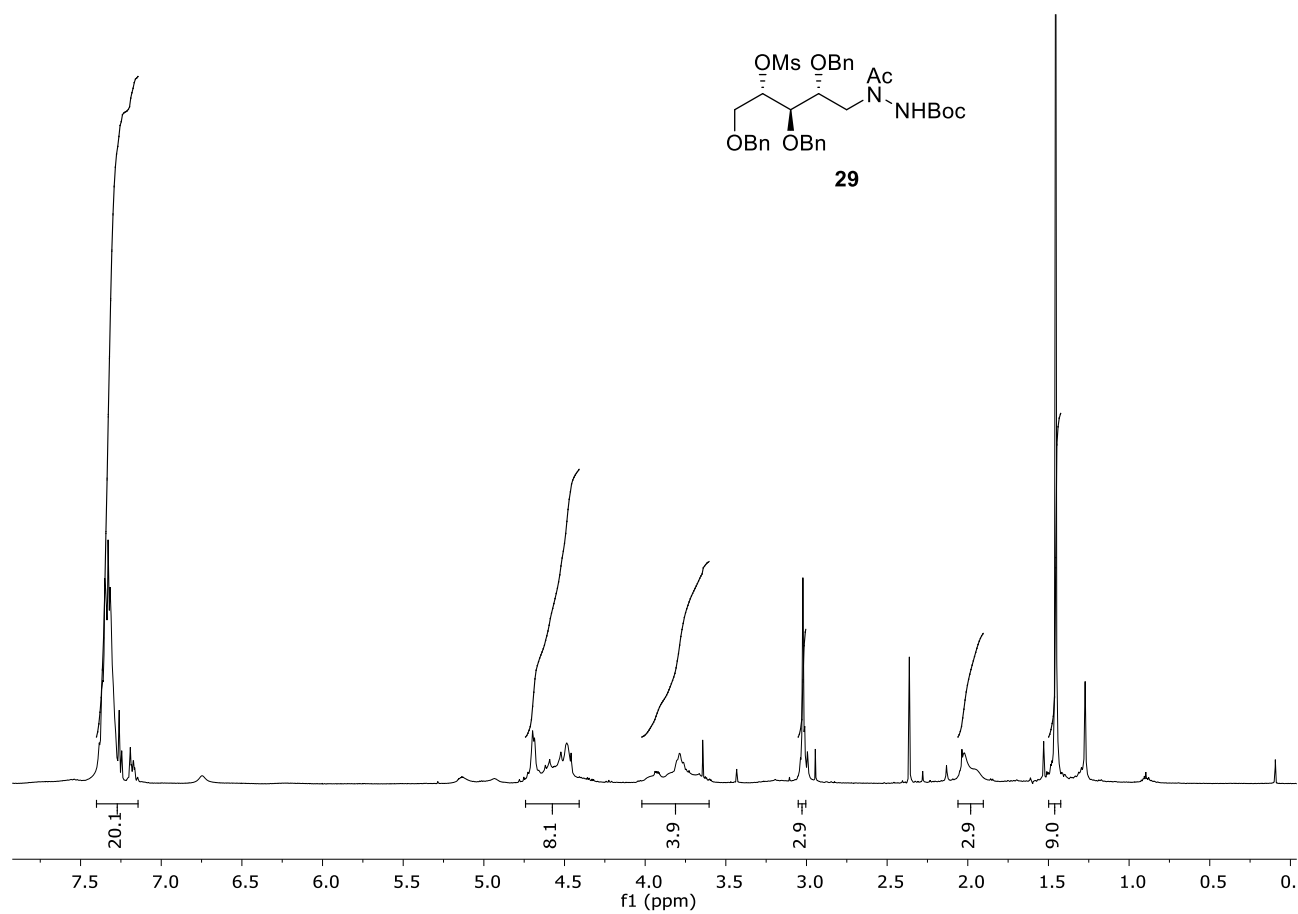

**1-(1-Acetyl)hydrazino-1-deoxy-2,3,5-tri-O-benzyl-4-methanesulfonyl-L-ribose (30):**

<sup>1</sup>H-NMR (400 MHz, CDCl<sub>3</sub>)

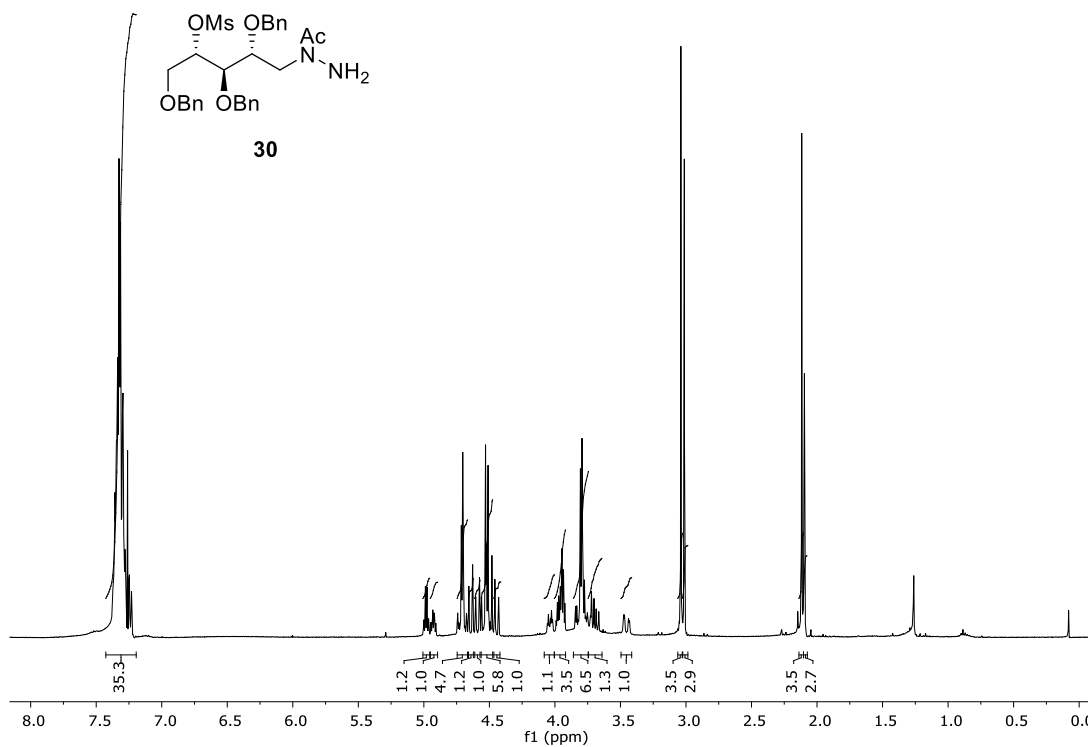

<sup>13</sup>C-NMR (100 MHz, CDCl<sub>3</sub>)

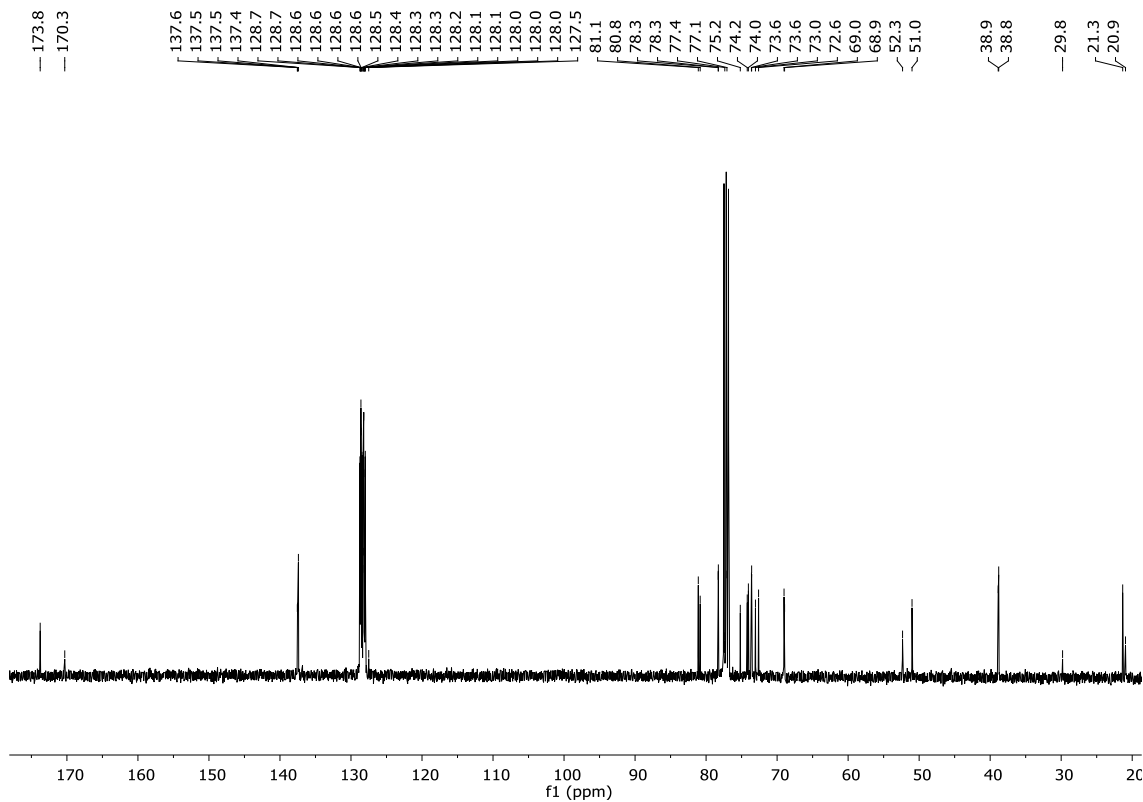

**(3R,4S,5R)-1-N-acetyl-3-benzyloxymethyl-4,5-di-O-benzyl-4,5-dihydroxyhexahydropyridazine (31):**

<sup>1</sup>H-NMR (400 MHz, CDCl<sub>3</sub>)

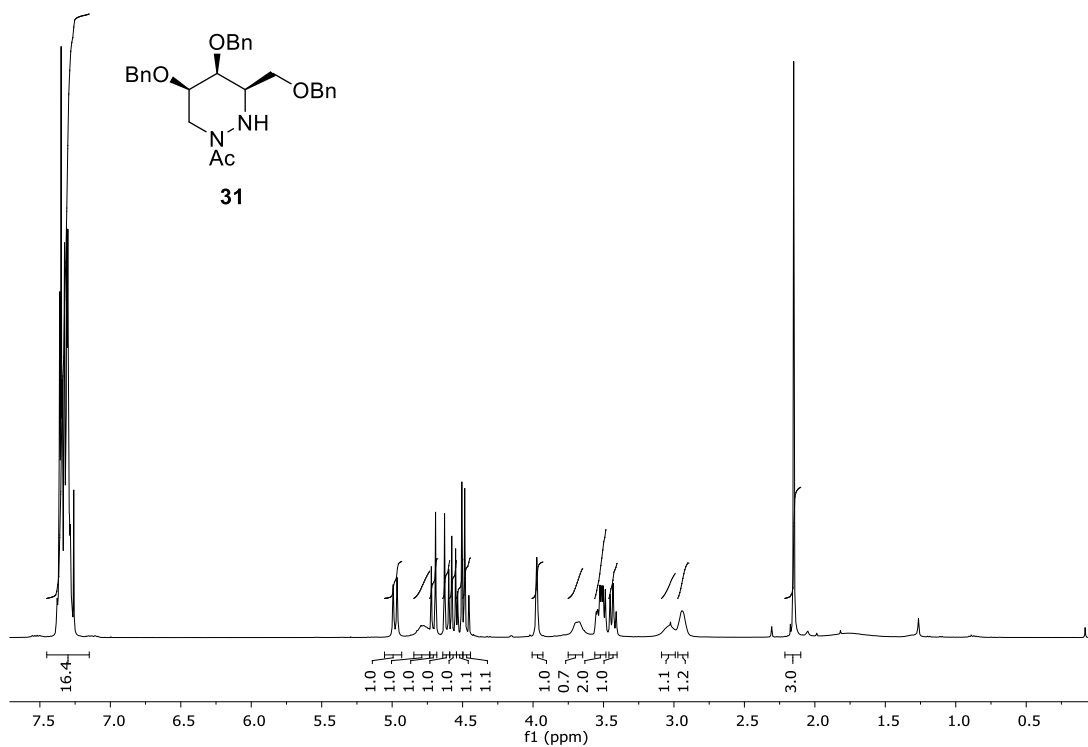

<sup>13</sup>C-NMR (100 MHz, CDCl<sub>3</sub>)

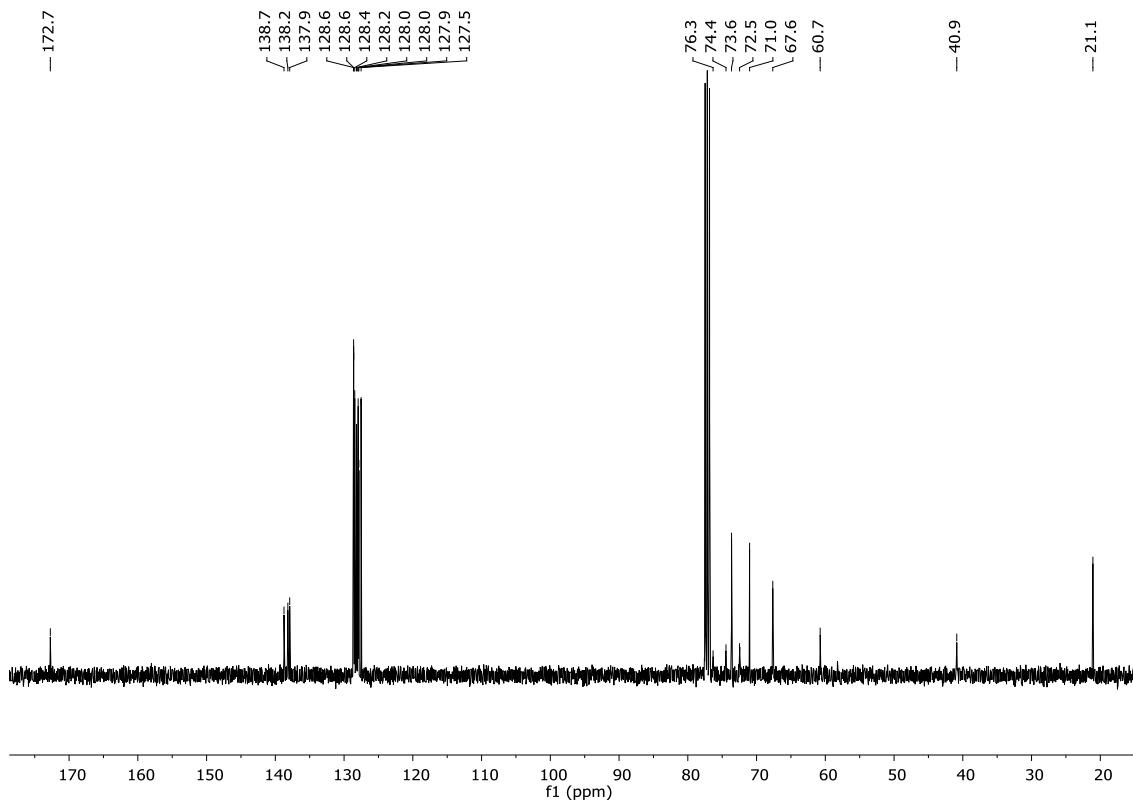

**1-*N*-Acetyl-2-*N*-butyl-azagalactofagomine (32):**

<sup>1</sup>H-NMR (400 MHz, CD<sub>3</sub>OD):

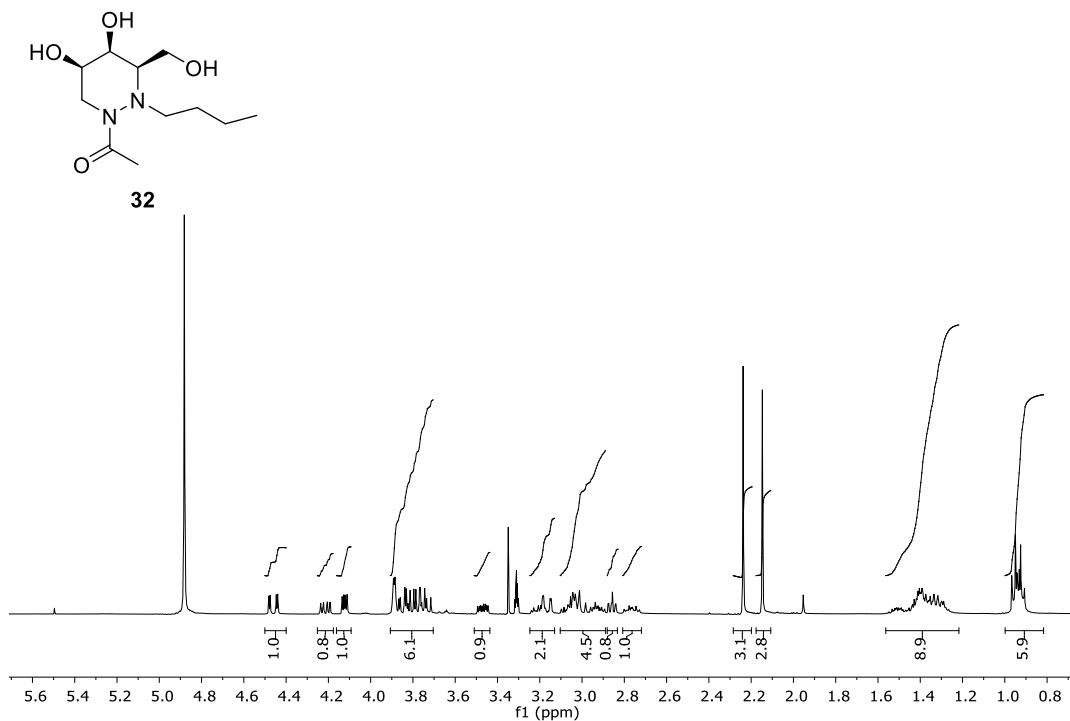

<sup>13</sup>C-NMR (100 MHz, CD<sub>3</sub>OD): δ<sub>c</sub>

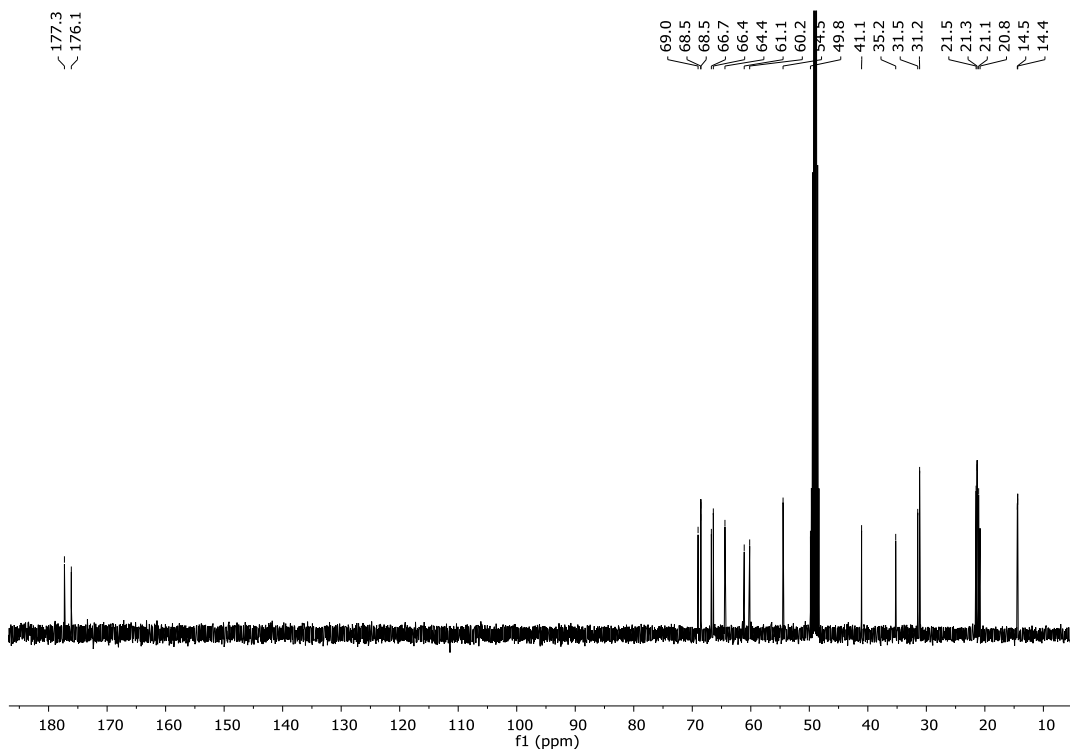



**2-N-butyl-azagalactofagomine (5-HCl):**

<sup>1</sup>H-NMR (400 MHz, D<sub>2</sub>O):

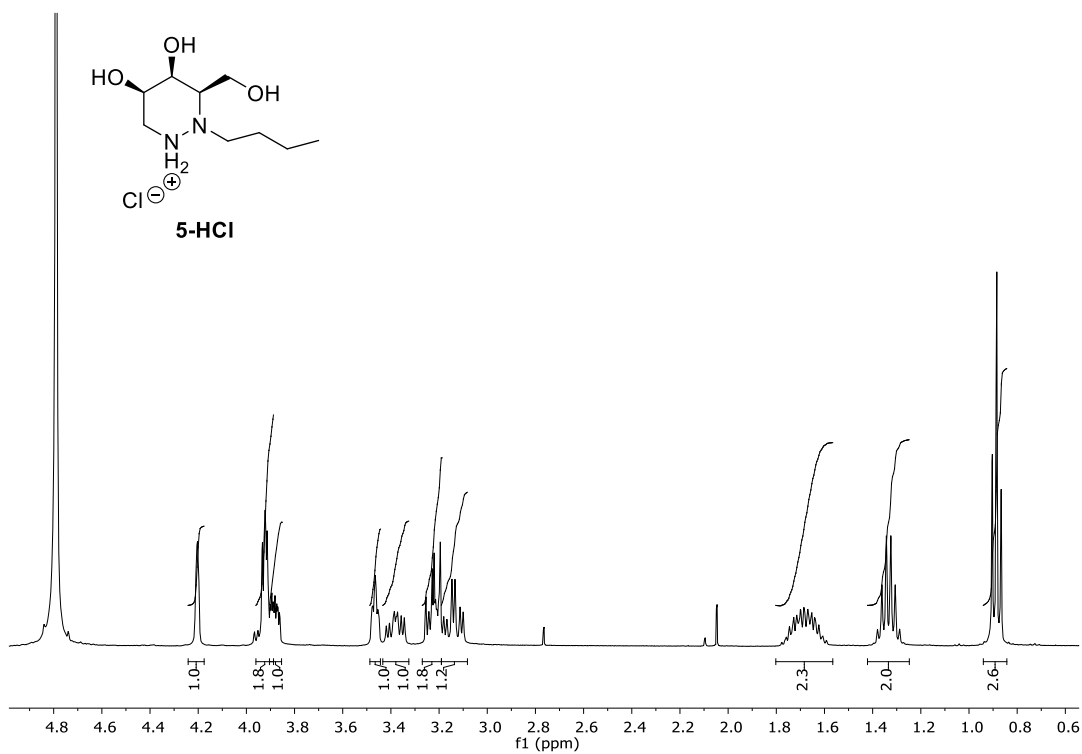

<sup>13</sup>C-NMR (100 MHz, D<sub>2</sub>O):

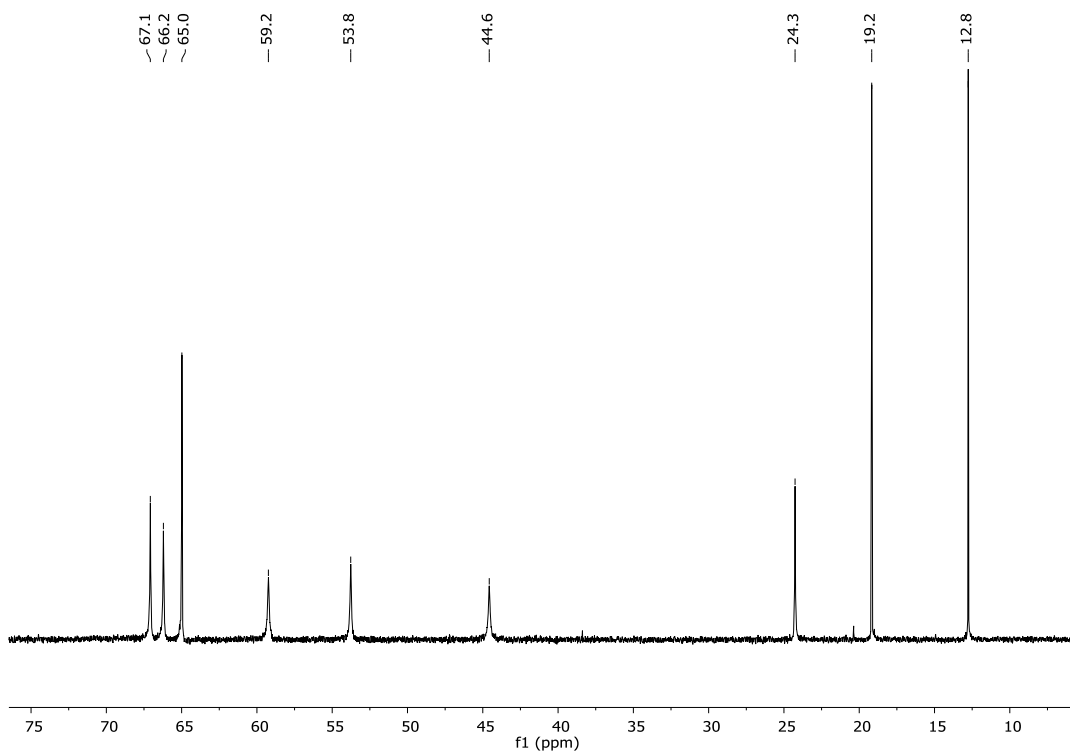

**1-*N*-Acetyl-2-*N*-nonyl-azagalactofagomine (33):**

<sup>1</sup>H-NMR (400 MHz, CD<sub>3</sub>OD):

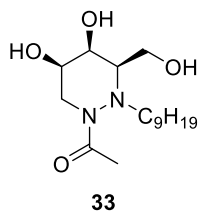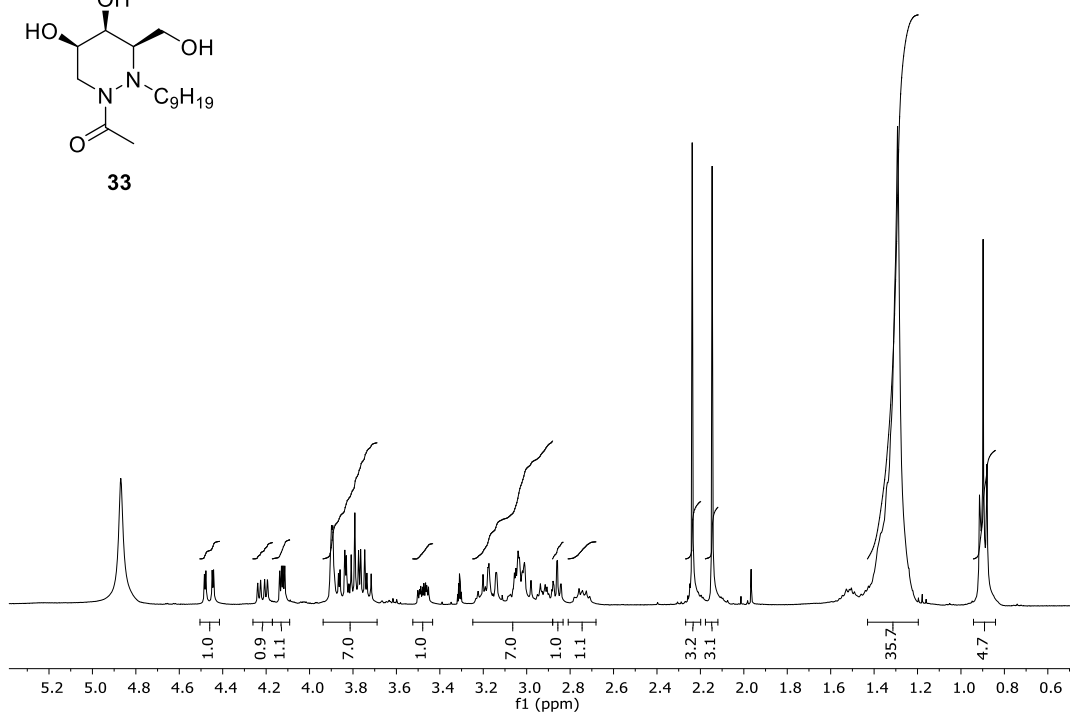

<sup>13</sup>C-NMR (100 MHz, CD<sub>3</sub>OD):

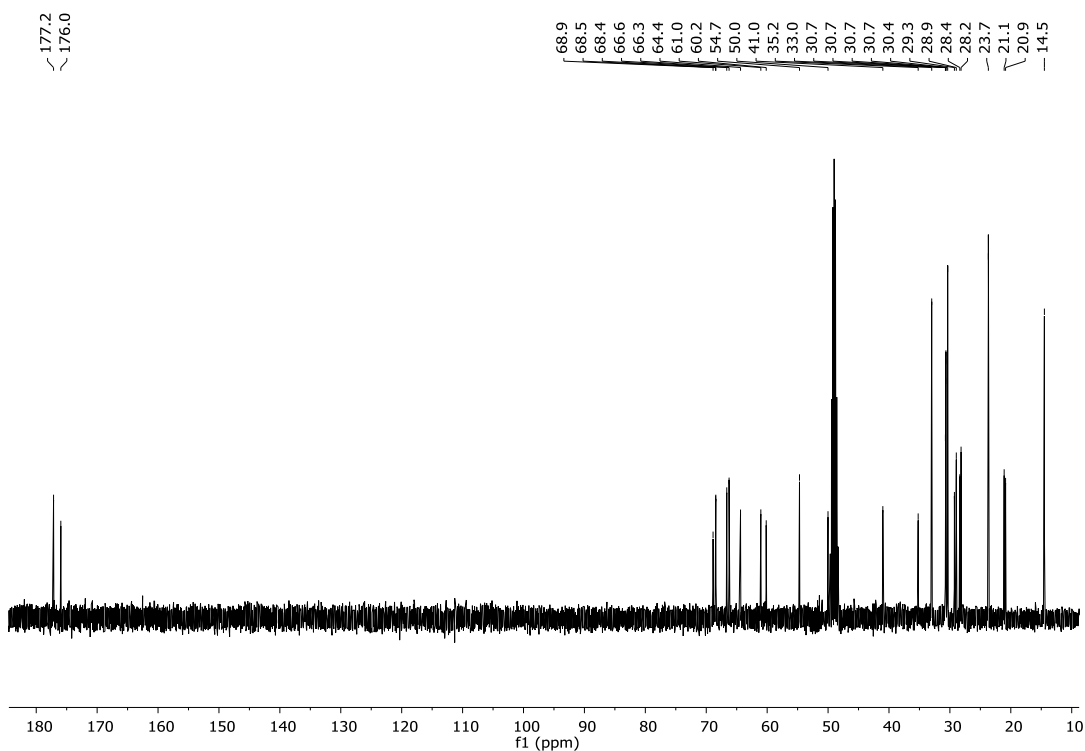

**2-N-nonyl-azagalactofagomine (34):**

<sup>1</sup>H-NMR (400 MHz, D<sub>2</sub>O):

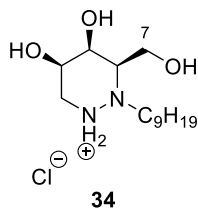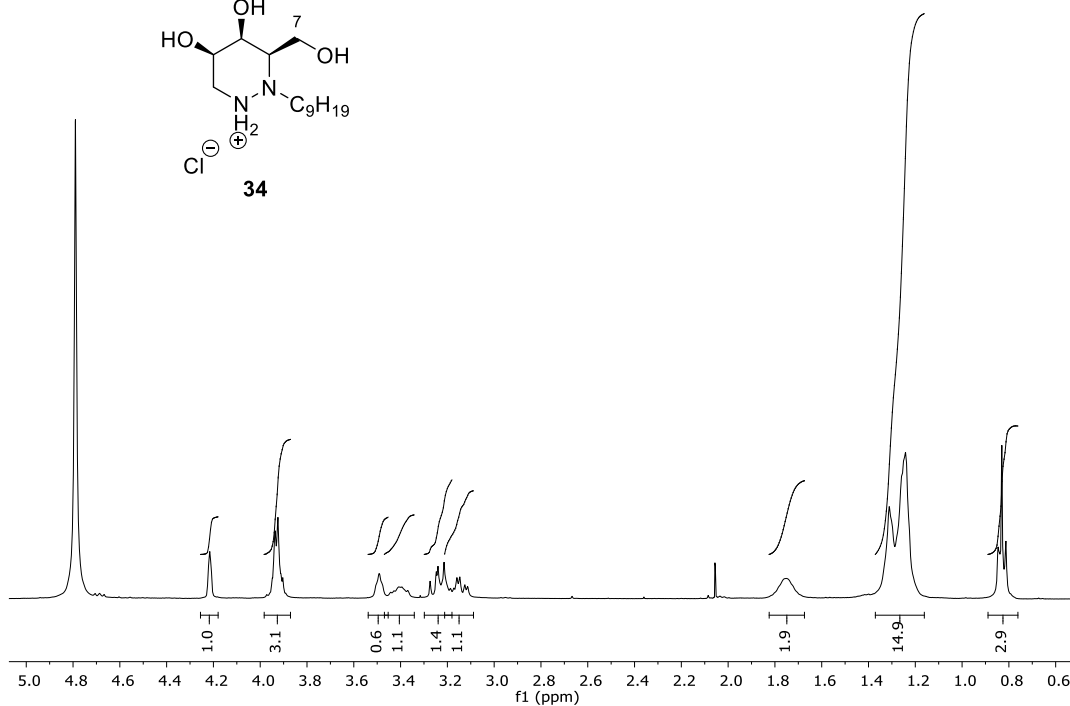

<sup>13</sup>C-NMR (100 MHz, D<sub>2</sub>O):

67.0  
66.5  
64.9  
59.3

31.6  
29.1  
29.1  
29.0  
28.9  
28.8  
26.2

22.3

13.6

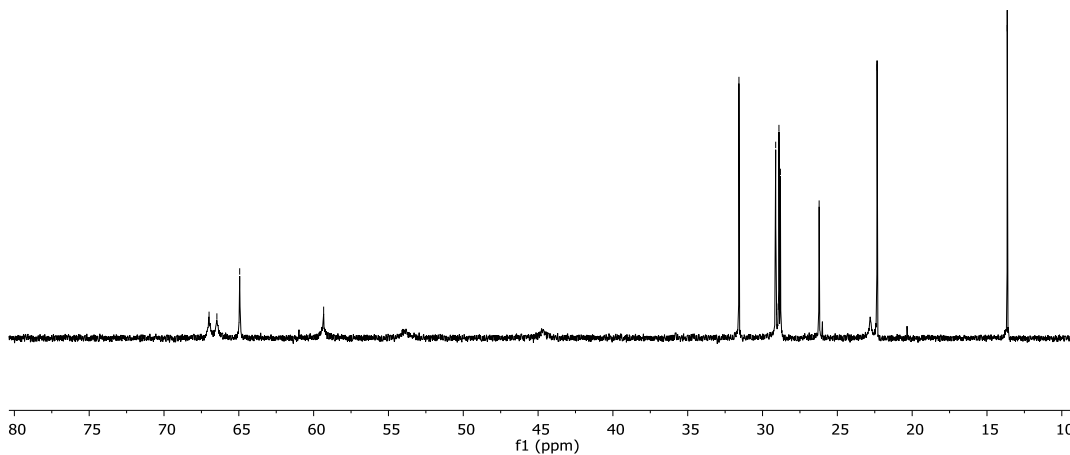

**1-N-acetyl-azagalactofagmine (35):**

<sup>1</sup>H-NMR (400 MHz, CD<sub>3</sub>OD):

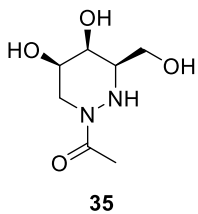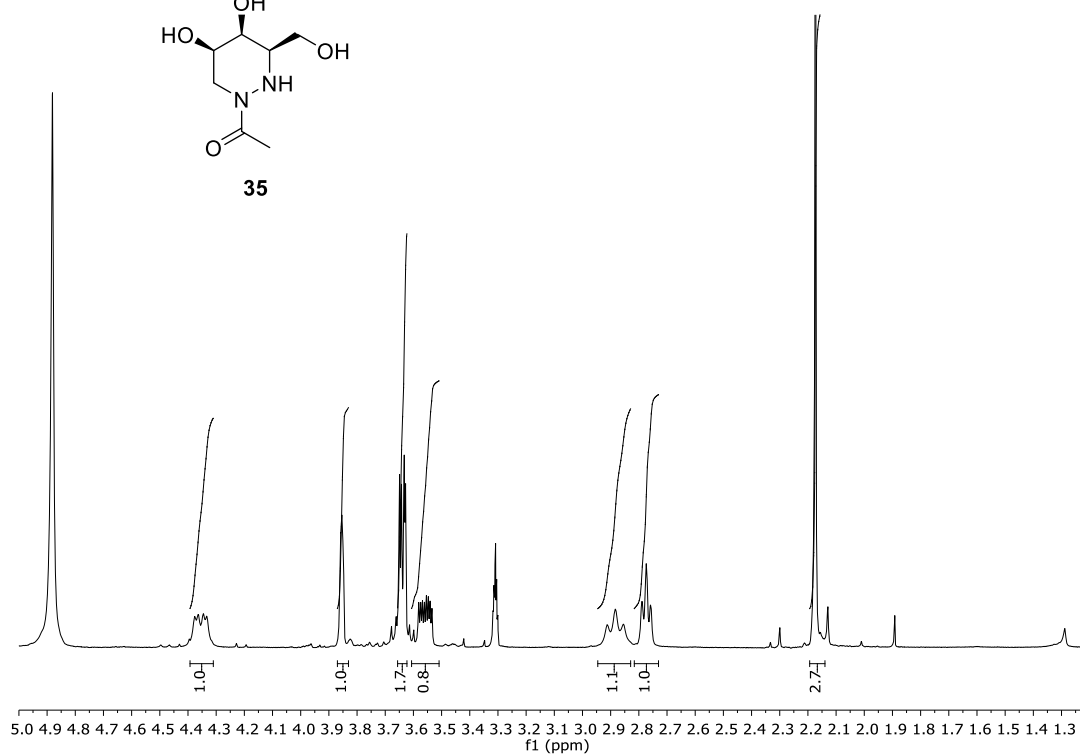

<sup>13</sup>C-NMR (100 MHz, CD<sub>3</sub>OD):

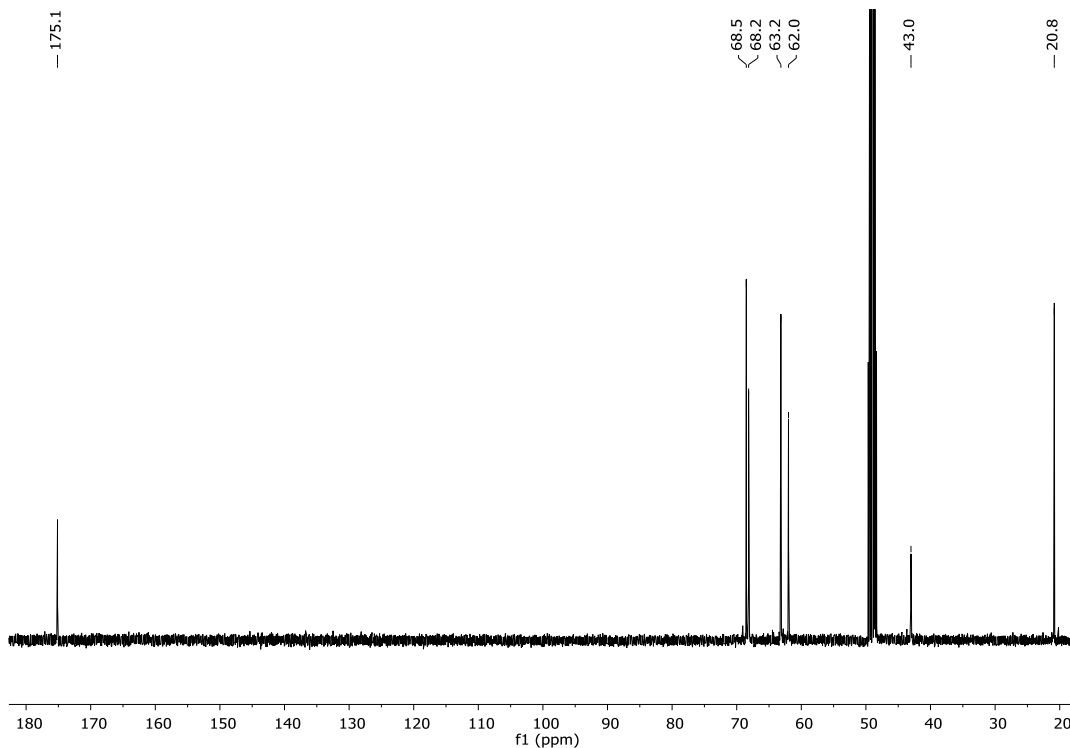

Michaelis-Menten and Hanes plots:

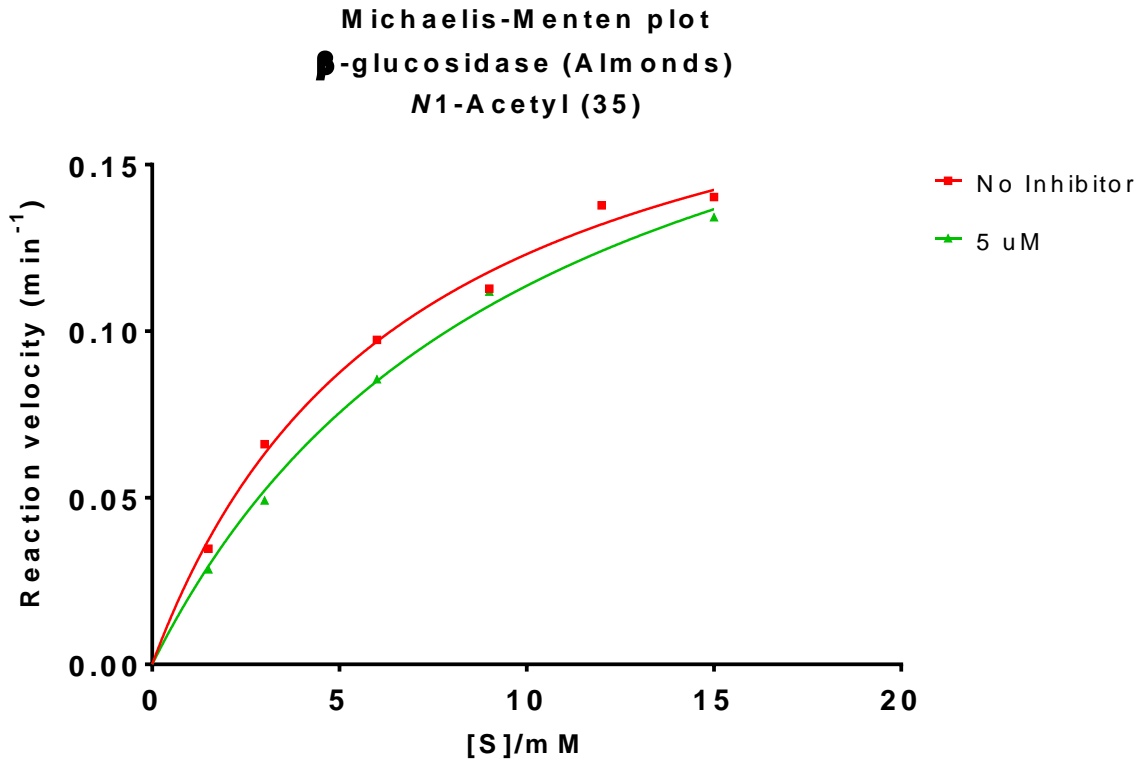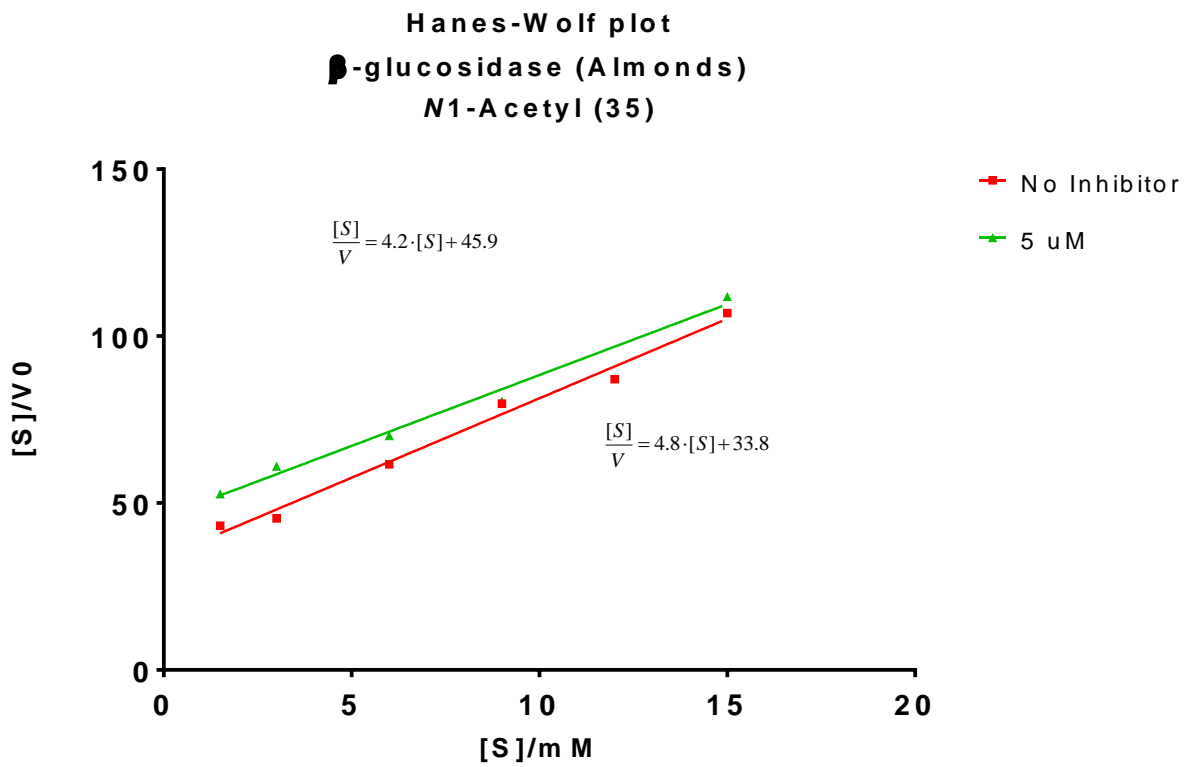

Michaelis-Menten plot  
 $\beta$ -glucosidase (Almonds)  
*N1*-Phenethyl (28)

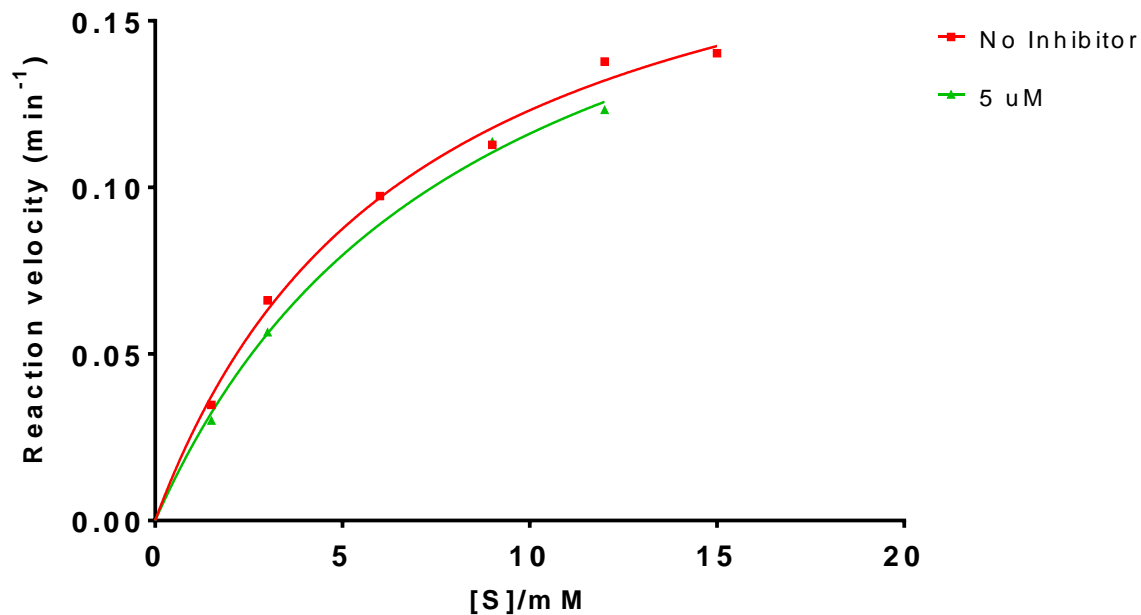

Hanes-Wolf plot  
 $\beta$ -glucosidase (Almonds)  
*N1*-Phenethyl (28)

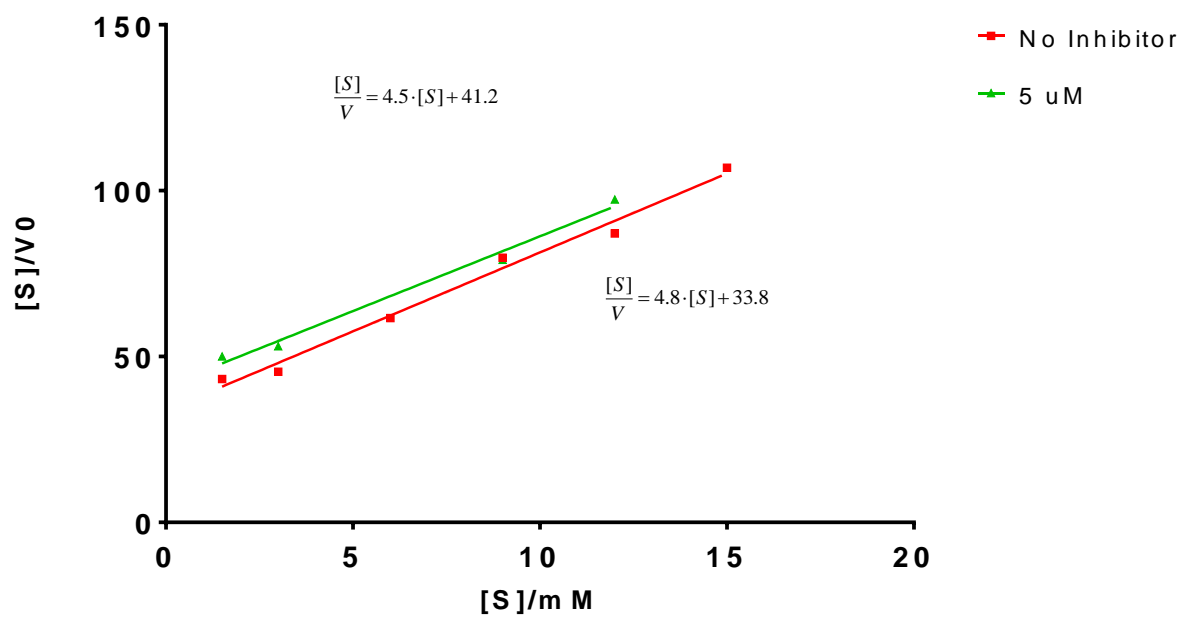

Michaelis Menten plot  
 $\beta$ -glucosidase (Almonds)  
*N*2-Butyl (5-HCl)

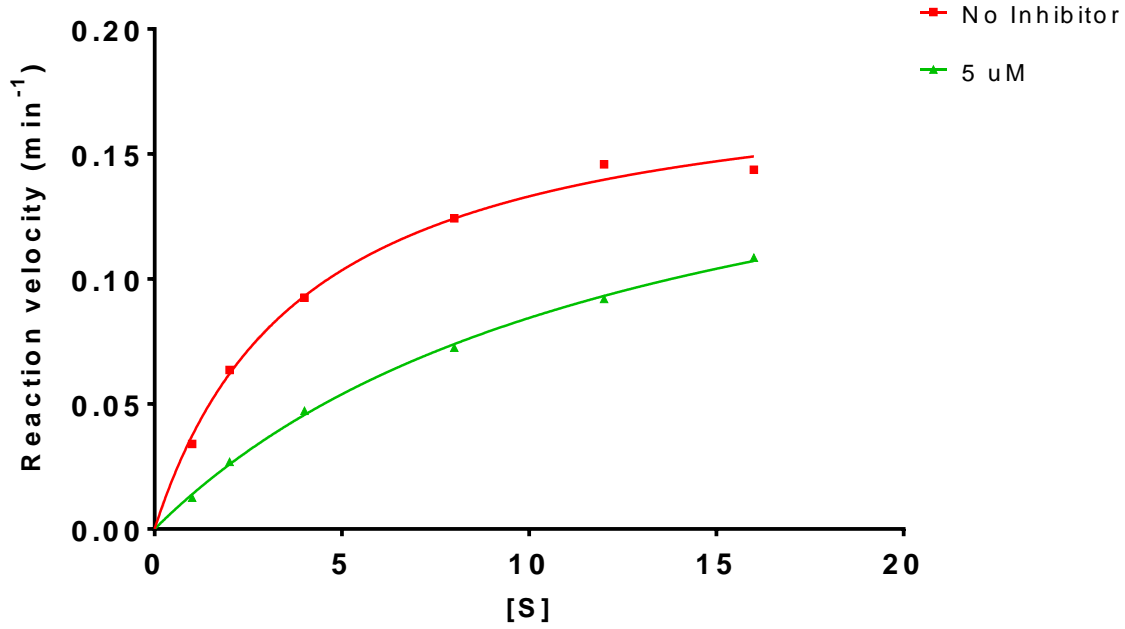

Hanes-Wolf  
 $\beta$ -glucosidase (Almonds)  
*N*2-Butyl (5-HCl)

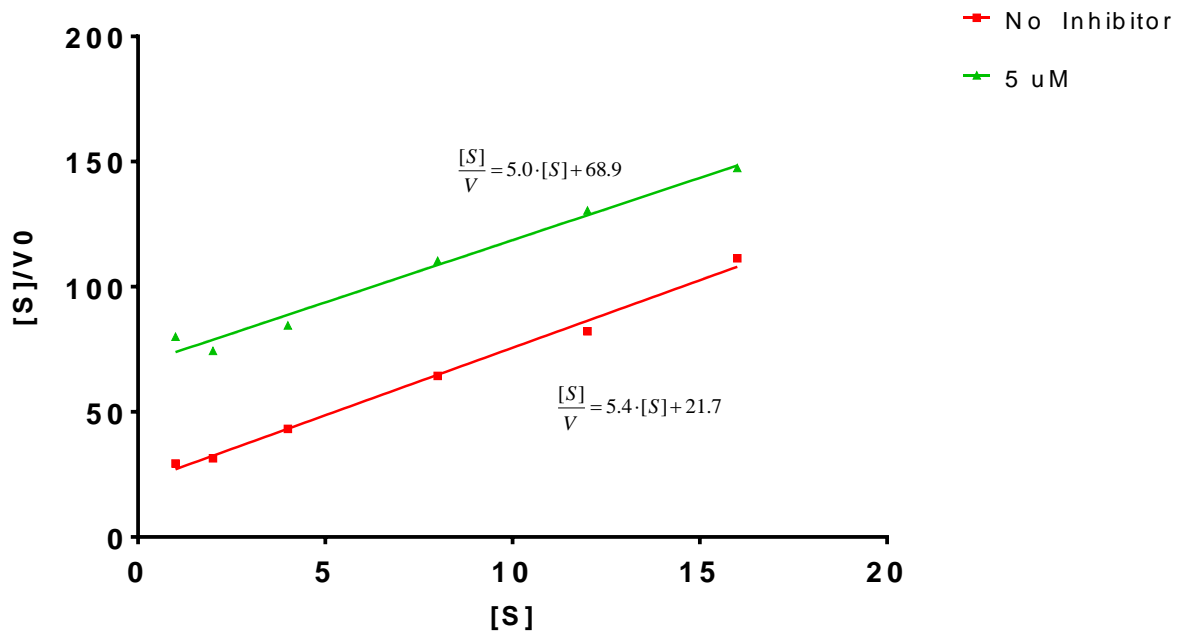

Michaelis-Menten plot  
 $\beta$ -glucosidase (Almonds)  
 N2-Nonyl (34)

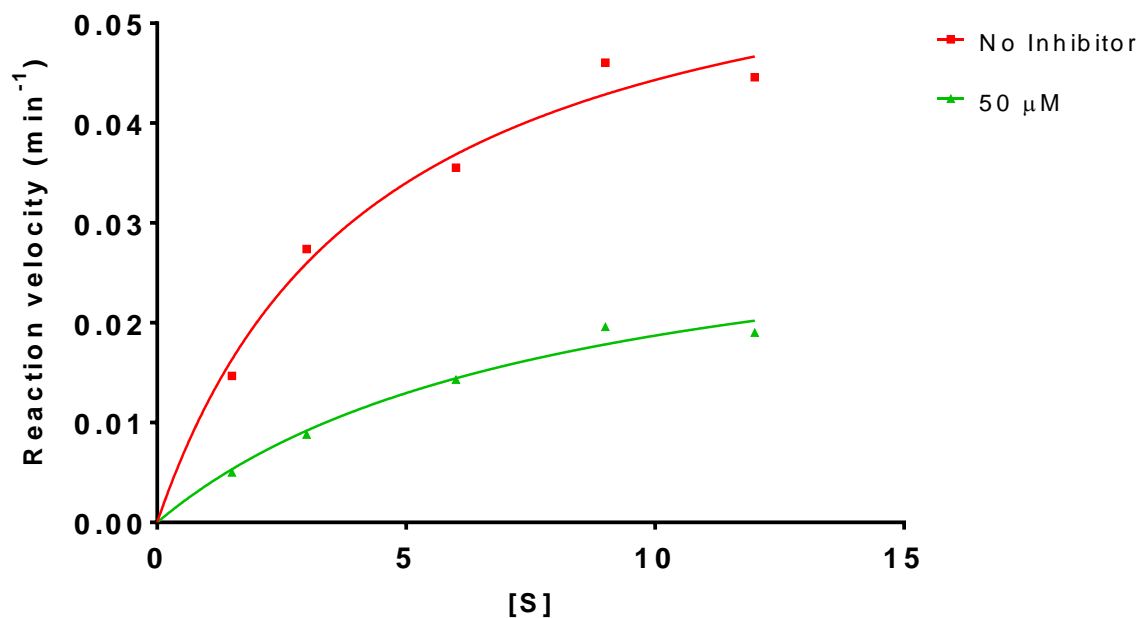

Hanes-Wolf plot  
 $\beta$ -glucosidase (Almonds)  
 N2-Nonyl (34)

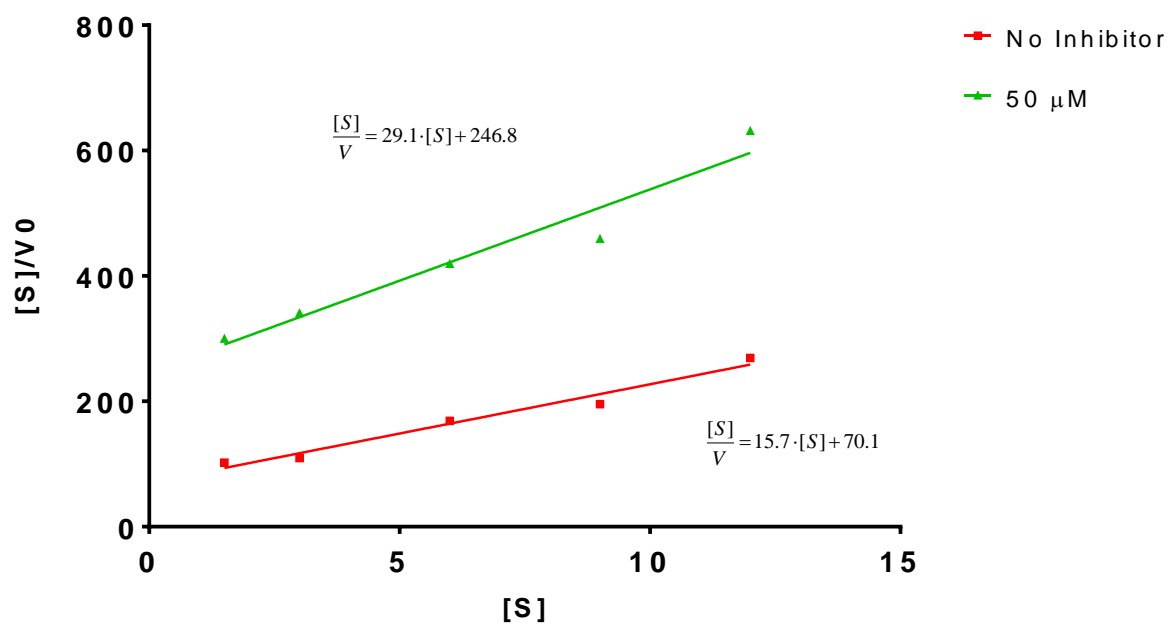



Hanes-Wolf plot  
 $\beta$ -galactosidase (*Asp. Ory.*)  
*N*1-Phenethyl (28)

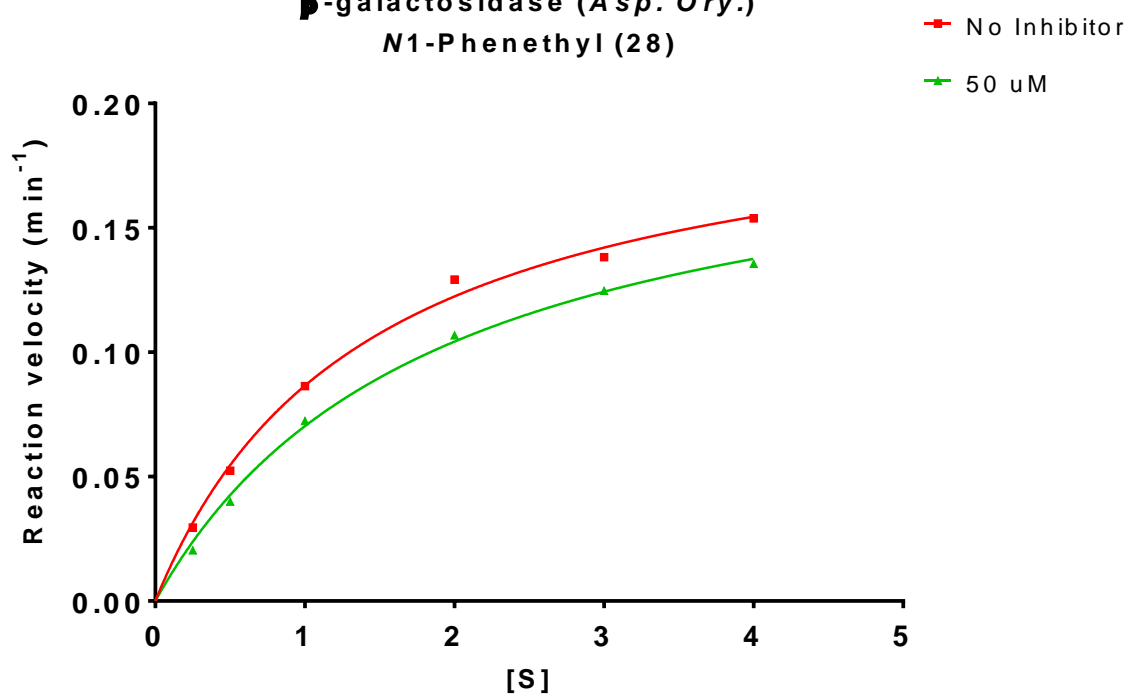

Hanes-Wolf  
 $\beta$ -galactosidase (*Asp. Ory.*)  
*N*1-Phenethyl (28)

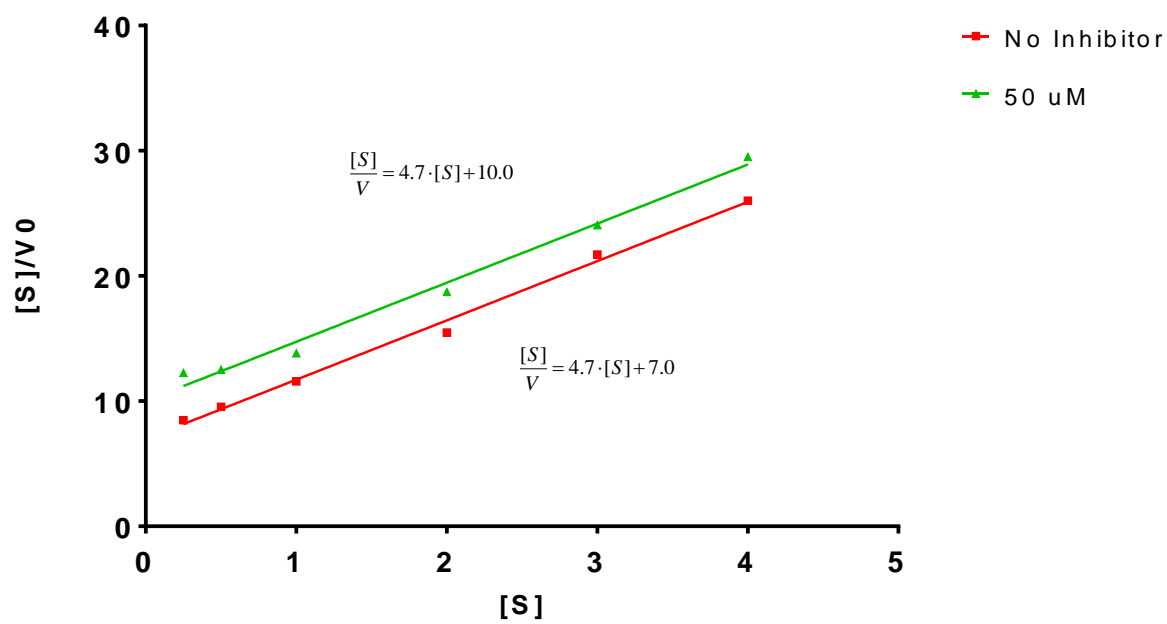

Michaelis-Menten plot  
 $\beta$ -galactosidase (*A. sp. Ory.*)  
 N1-Butyl (4)

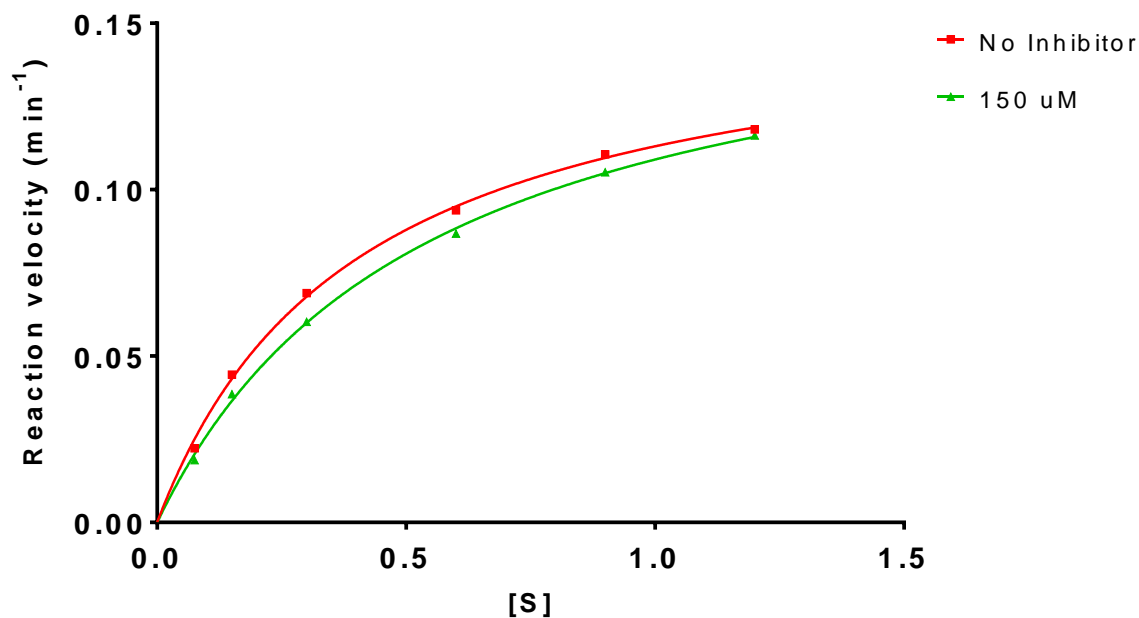

Hanes-Wolf plot  
 $\beta$ -galactosidase (*A. sp. Ory.*)  
 N1-Butyl (4)

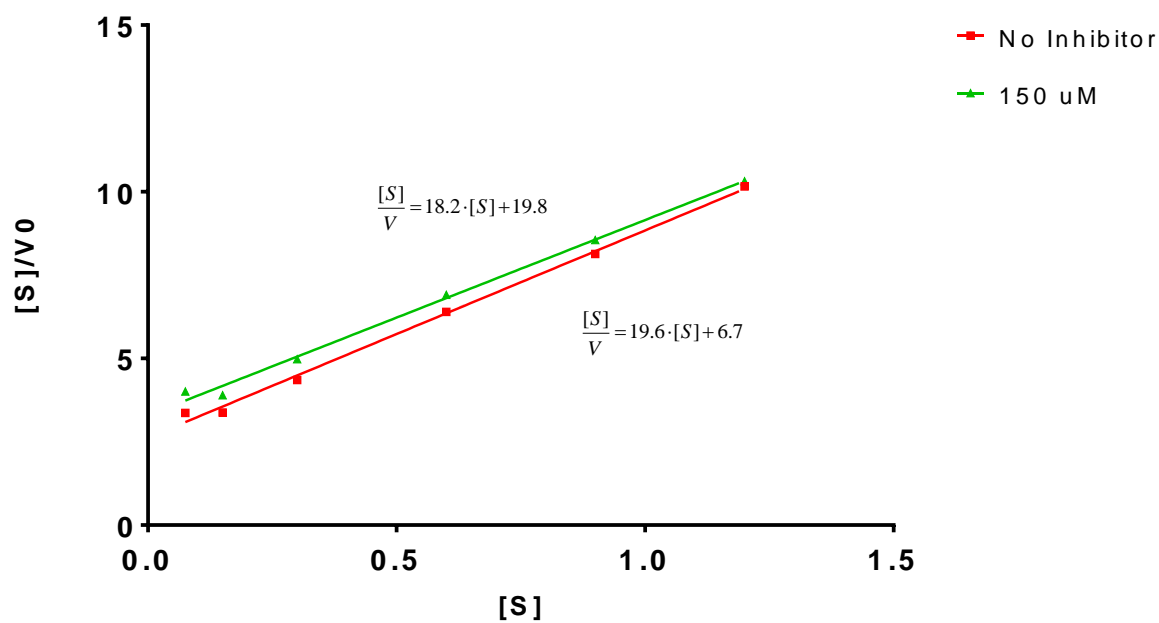

Michaelis-Menten plot  
 $\beta$ -galactosidase (*Asp. ory.*)  
 N1-Nonyl (26)

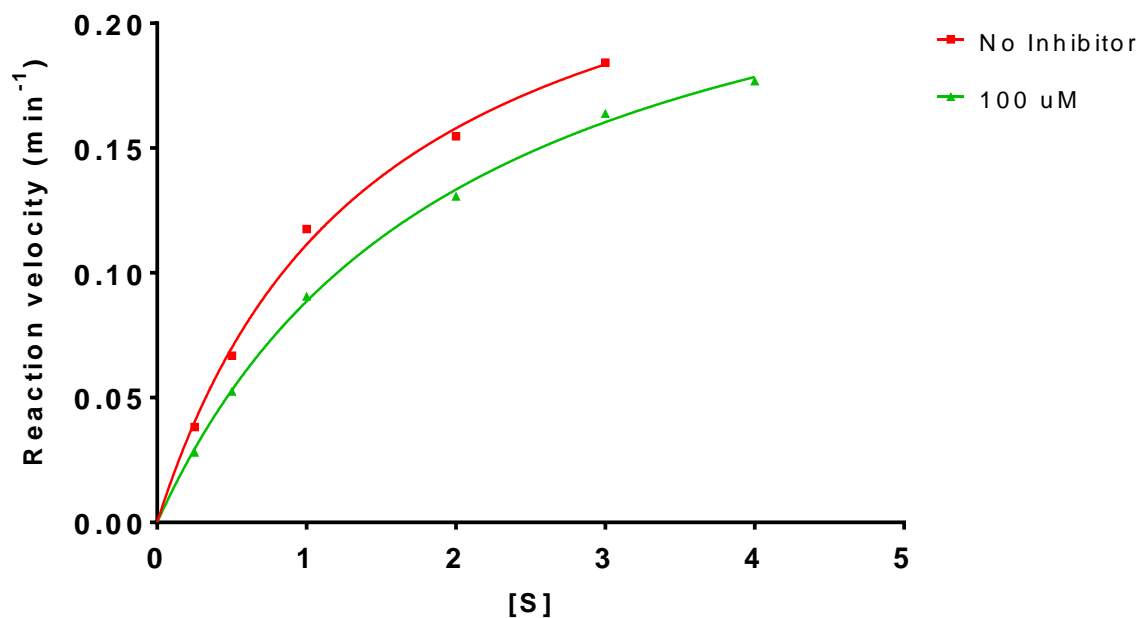

Hanes-Wolf plot  
 $\beta$ -galactosidase (*Asp. ory.*)  
 N1-Nonyl (26)

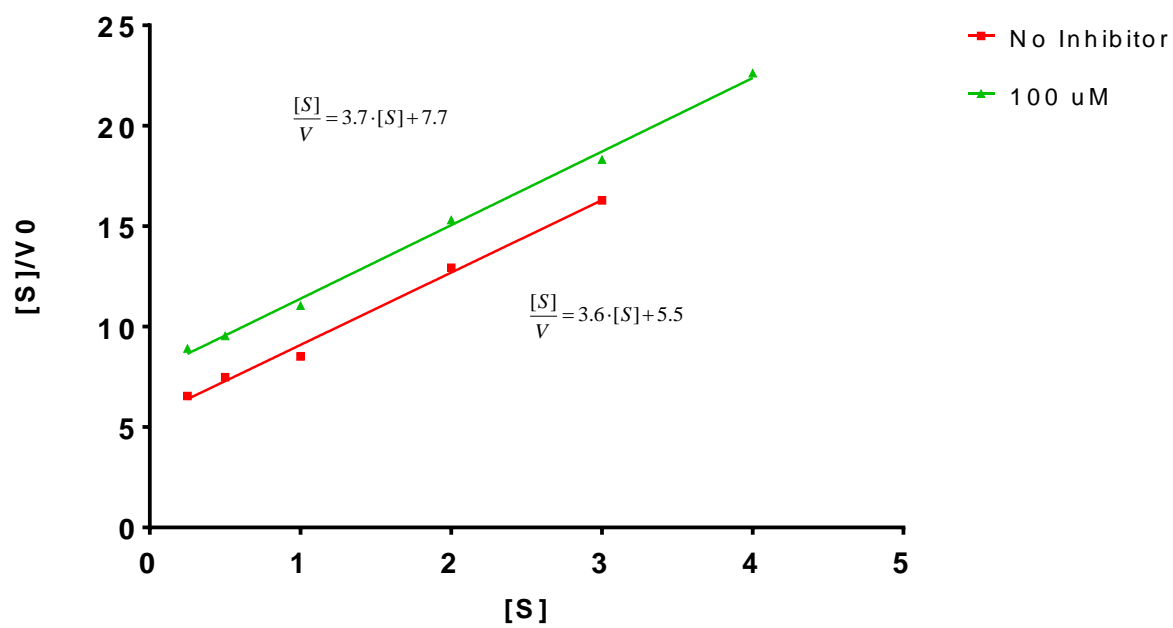

Michaelis-Menten plot  
 $\beta$ -galactosidase (*Asp. Ory.*)  
 N2-Butyl (5-HCl)

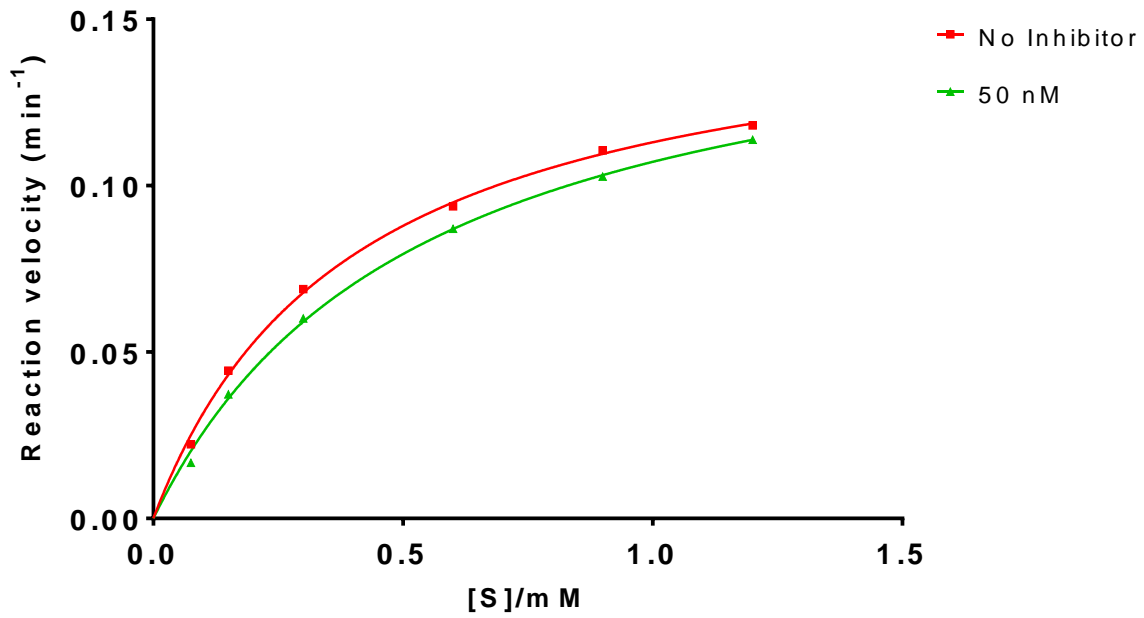

Hanes-Wolf plot  
 $\beta$ -galactosidase (*Asp. Ory.*)  
 N2-Butyl (5-HCl)

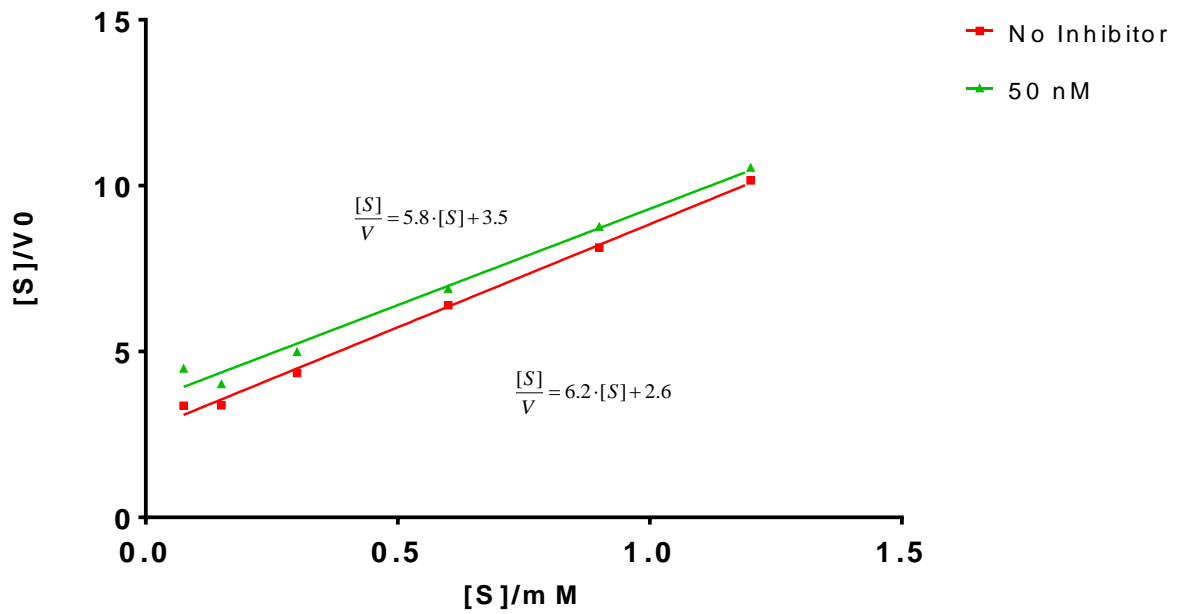

Michaelis-Menten plot  
 $\beta$ -galactosidase (*Asp. Ory.*)  
 N2-Nonyl (34)

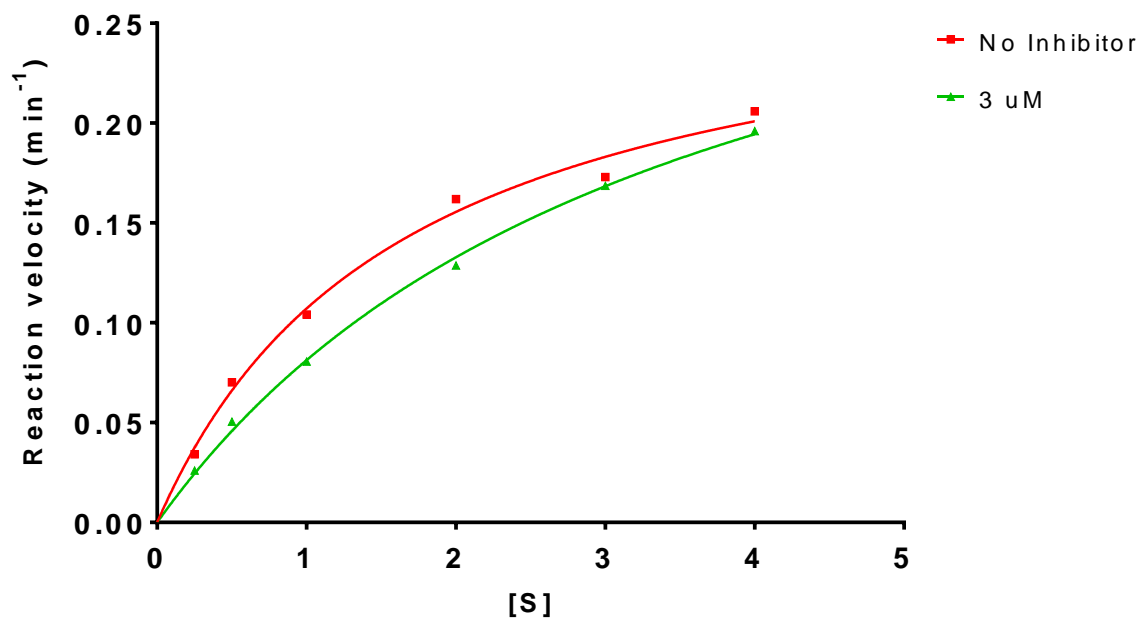

Hanes-Wolf plot  
 $\beta$ -galactosidase (*Asp. Ory.*)  
 N2-Nonyl (34)

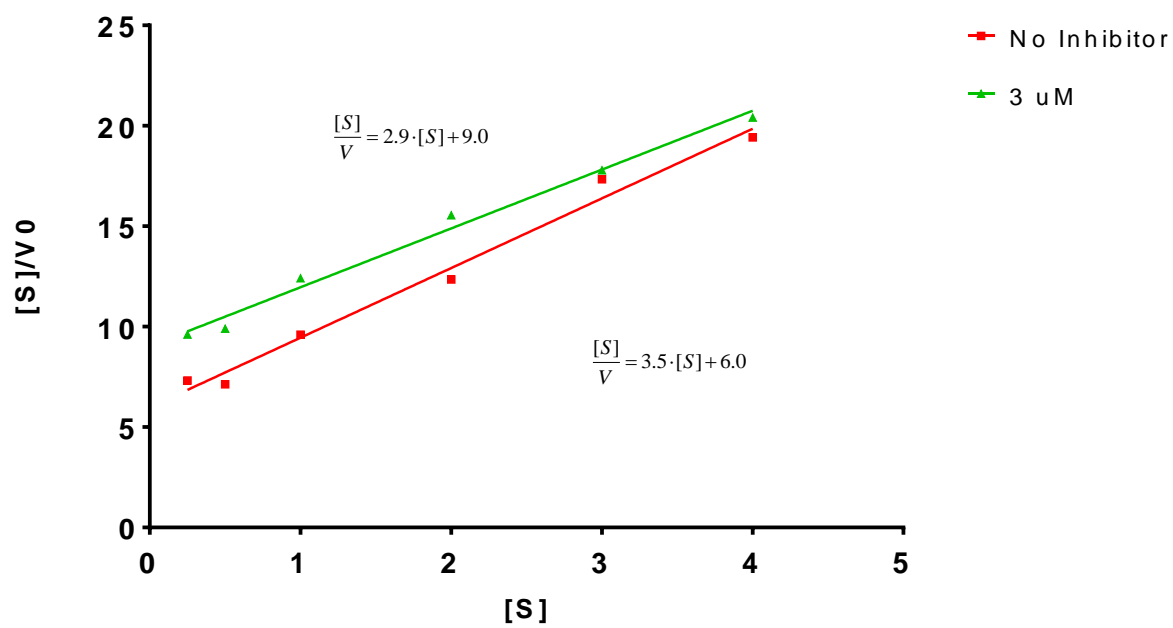

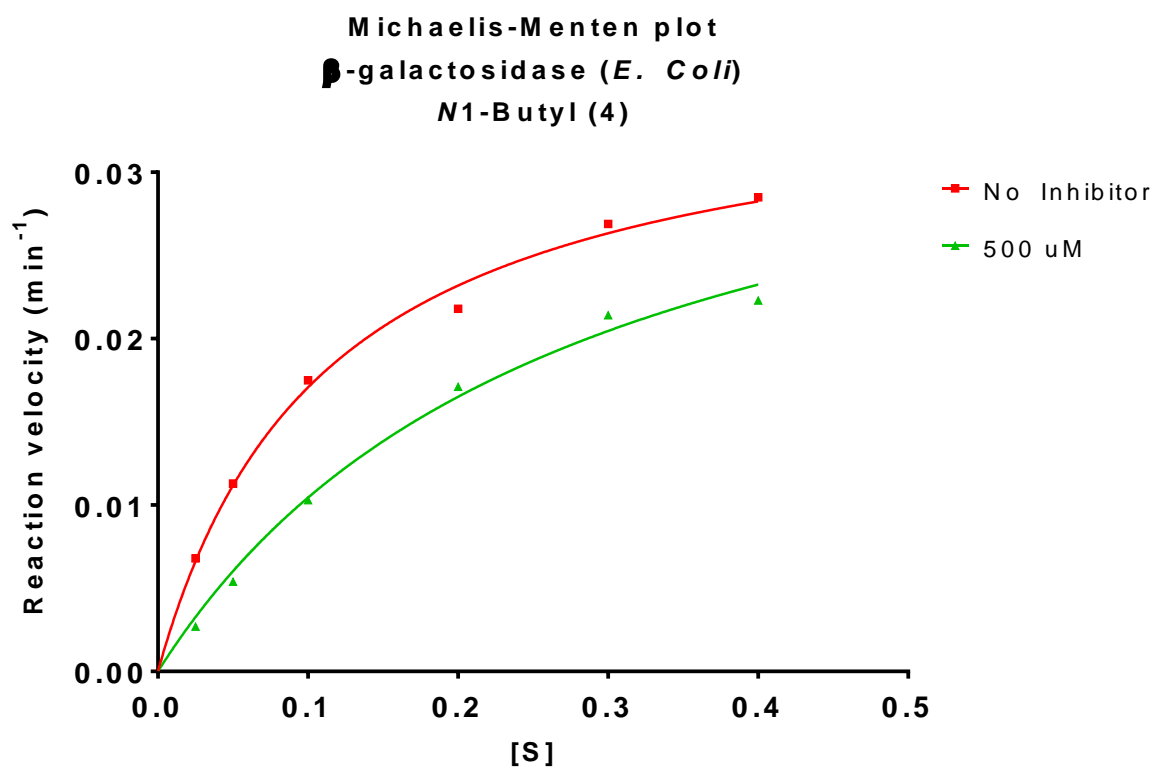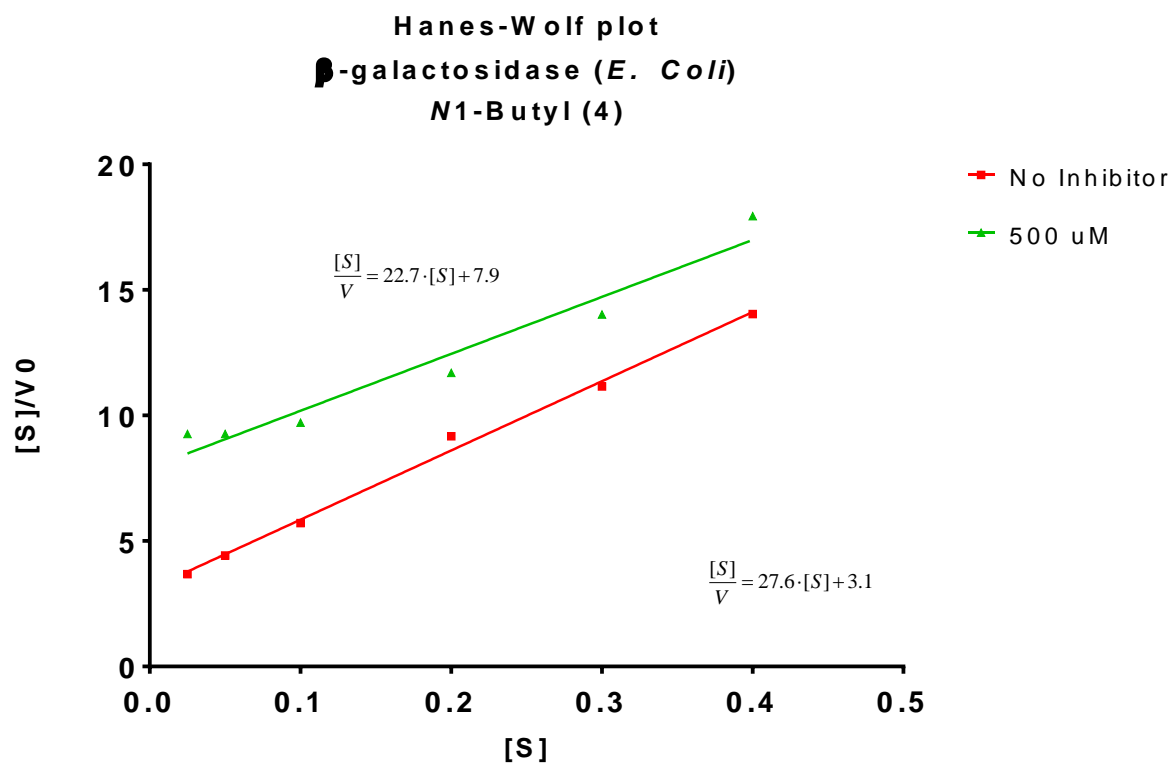

Michaelis-Menten plot  
 $\beta$ -galactosidase (*E. Coli*)  
 N1-Nonyl (26)

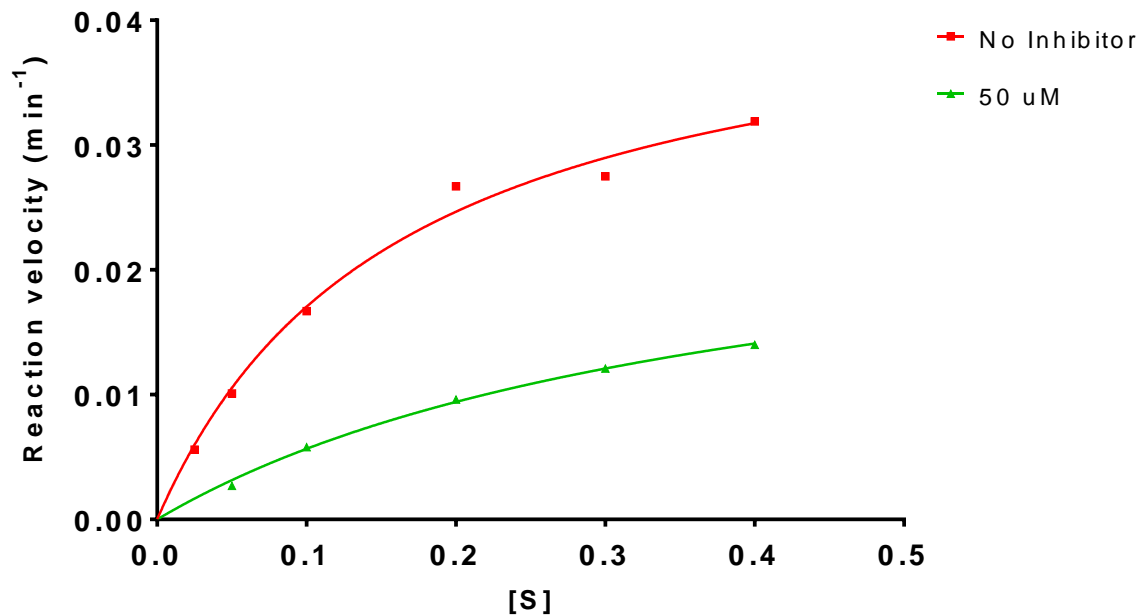

Hanes-Wolf plot  
 $\beta$ -galactosidase (*E. Coli*)  
 N1-Nonyl (26)

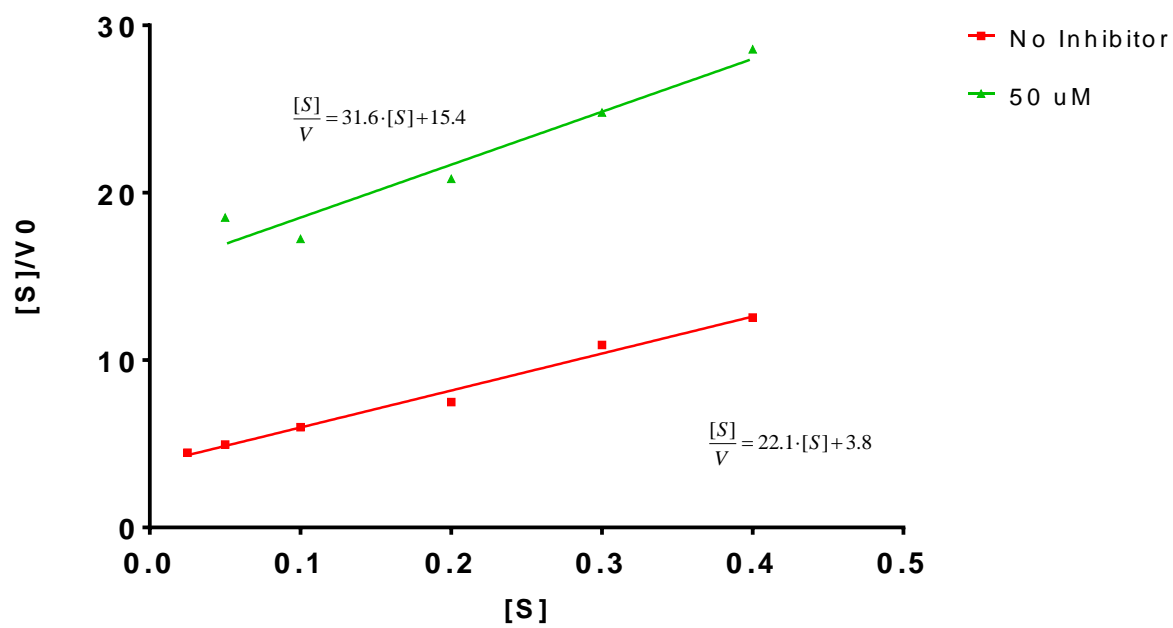

Michaelis-Menten plot  
 $\beta$ -galactosidase (*E. Coli*)  
 N2-Butyl (5-HCl)

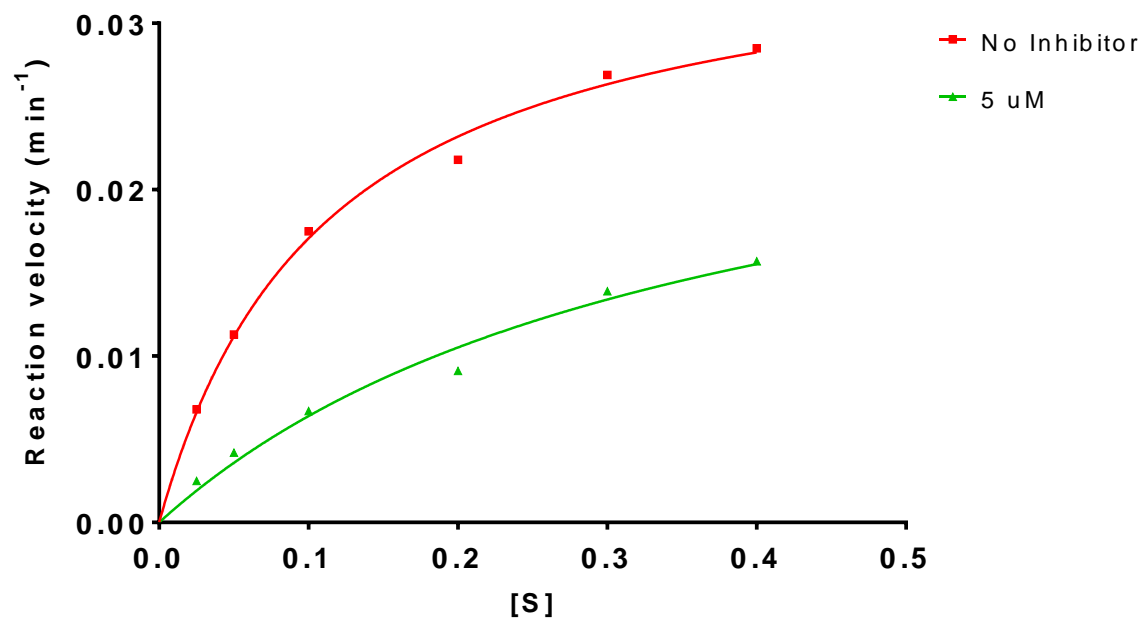

Hanes-Wolf plot  
 $\beta$ -galactosidase (*E. Coli*)  
 N2-Butyl (5-HCl)

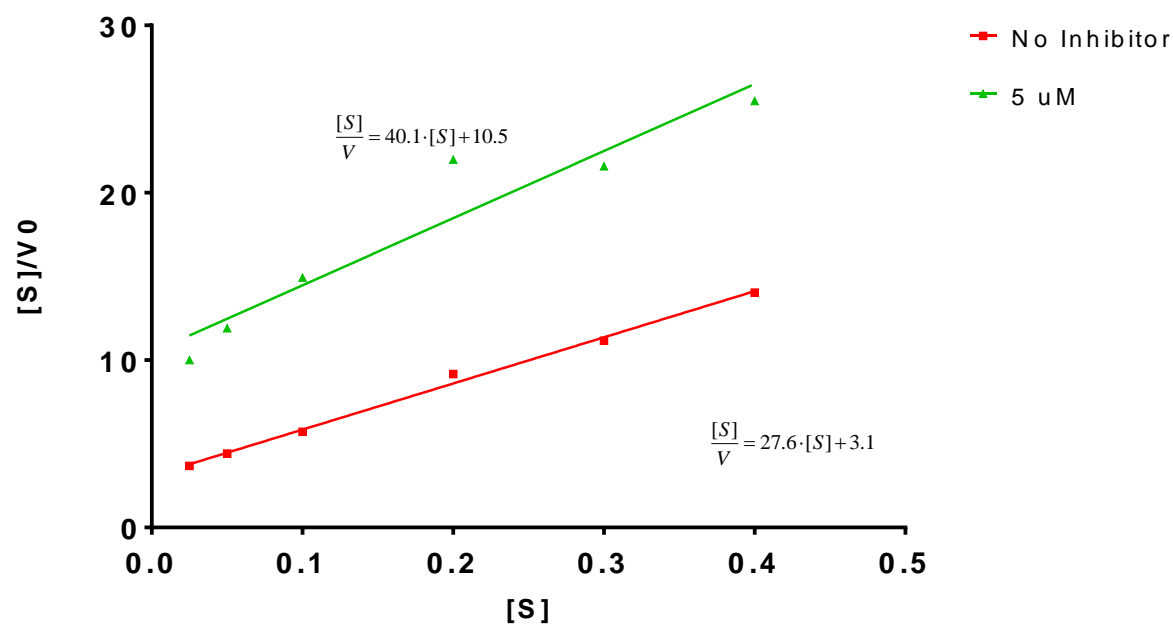



Michaelis-Menten plot  
 $\beta$ -galactosidase (*E. coli*)  
 N2-Nonyl (34)

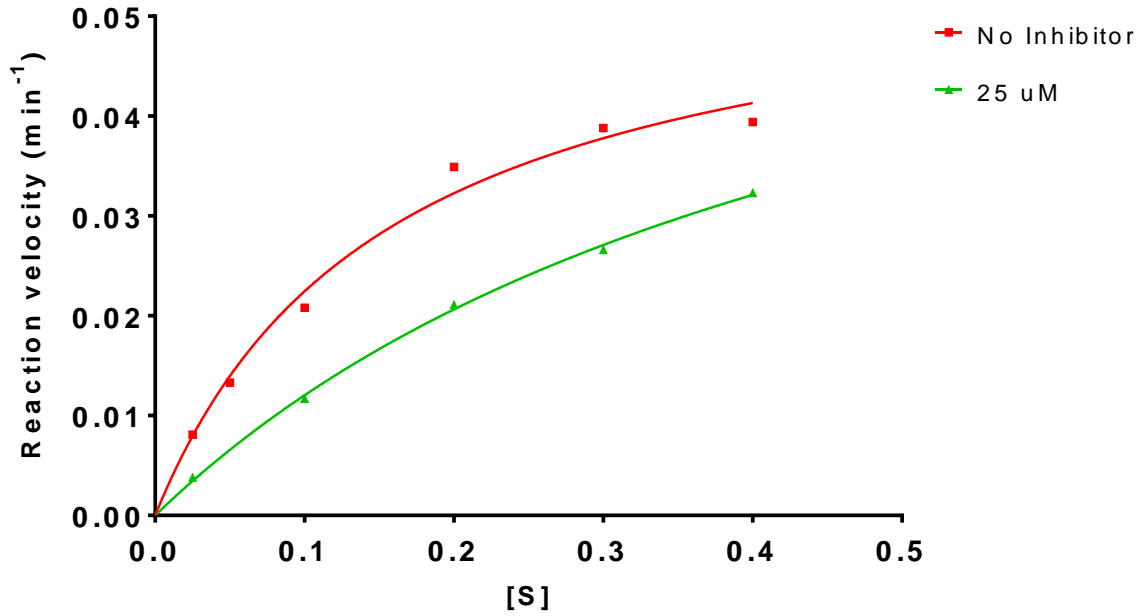

Hanes-Wolf plot  
 $\beta$ -galactosidase (*E. coli*)  
 N2-Nonyl (34)

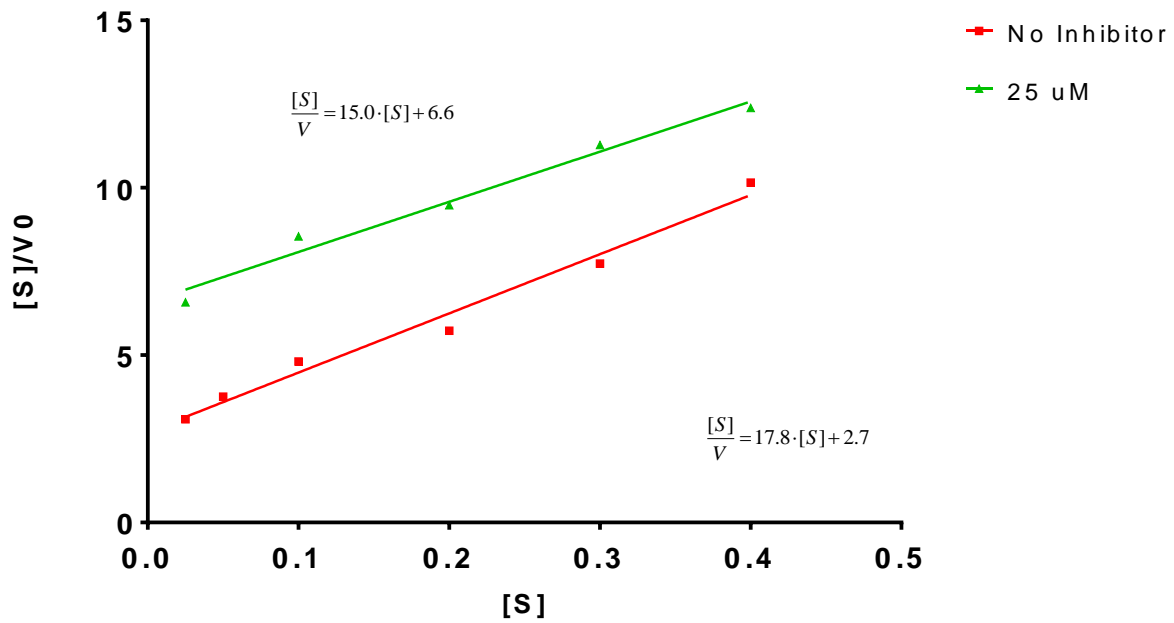

Michaelis-Menten plot  
 ●-galactosidase (Coffee)  
 N1-Phenethyl (28)

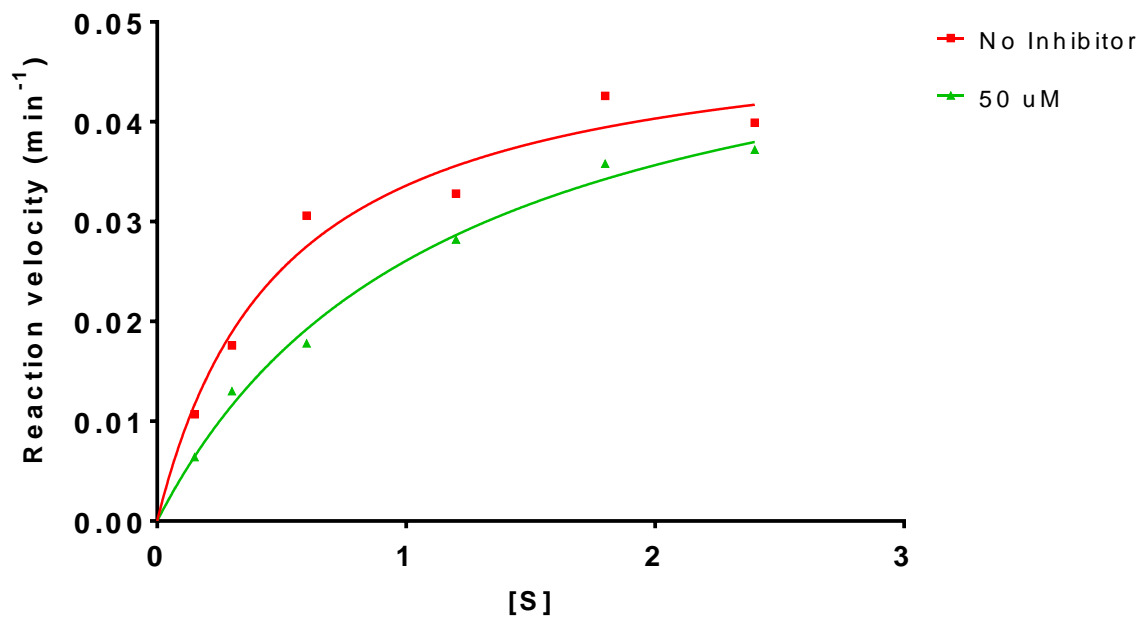

Hanes-Wolf plot  
 ●-galactosidase (Coffee)  
 N1-Phenethyl (28)

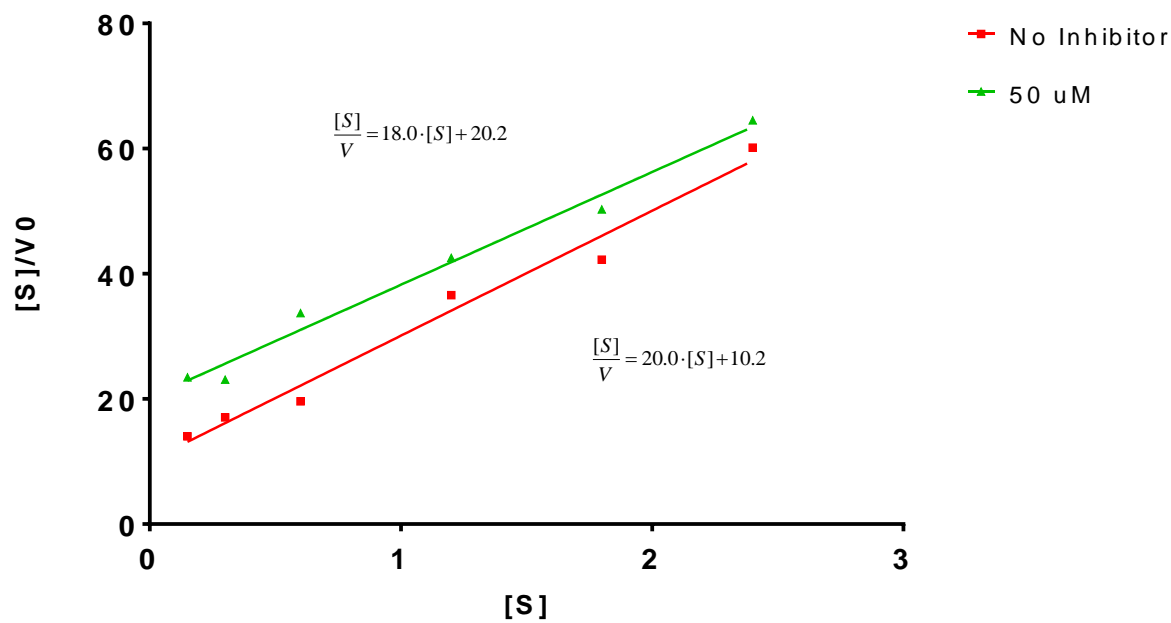

Michaelis-Menten plot  
 ●-galactosidase (Coffee)  
 N1-Butyl (4)

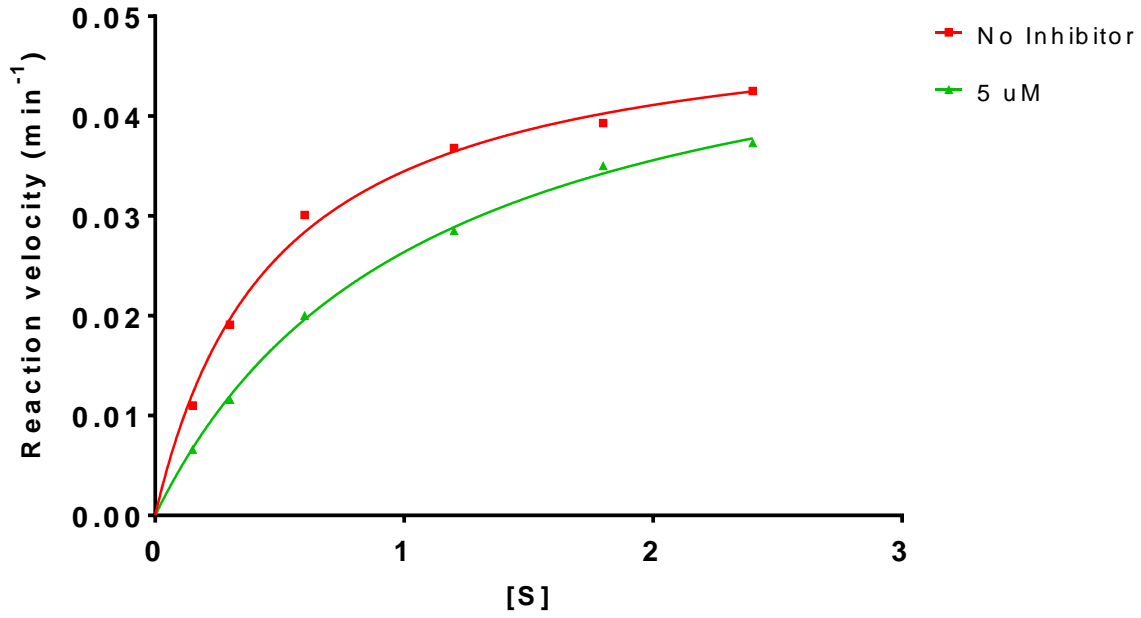

Hanes-Wolf plot  
 ●-galactosidase (Coffee)  
 N1-Butyl (4)

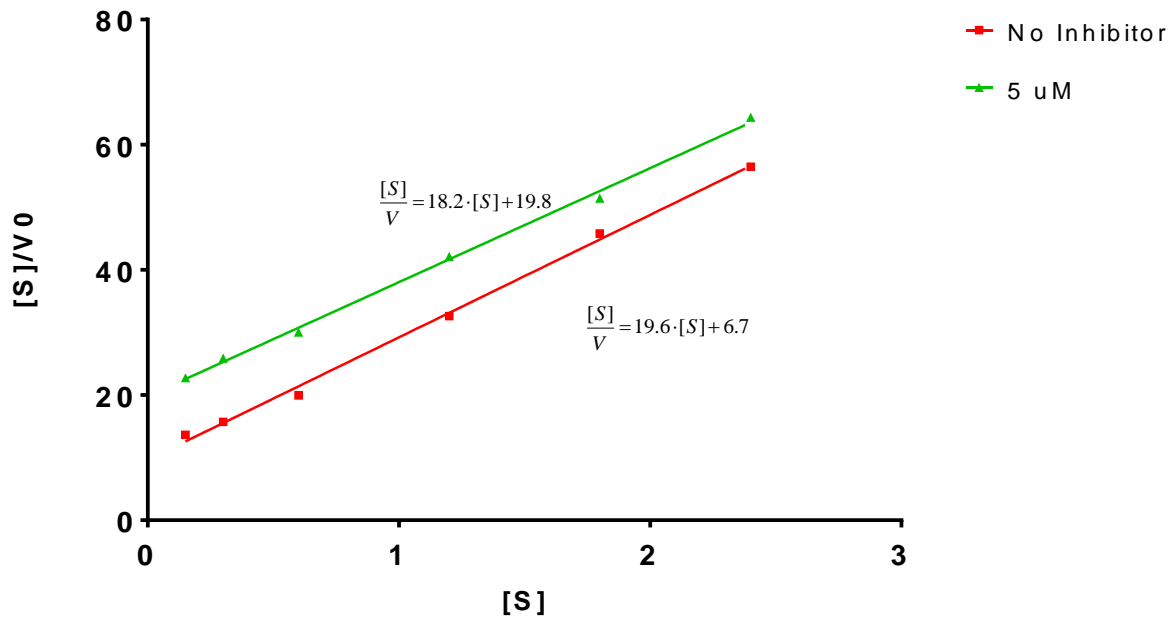

Michaelis-Menten plot  
 ●-galactosidase (Coffee)  
 N1-Nonyl (26)

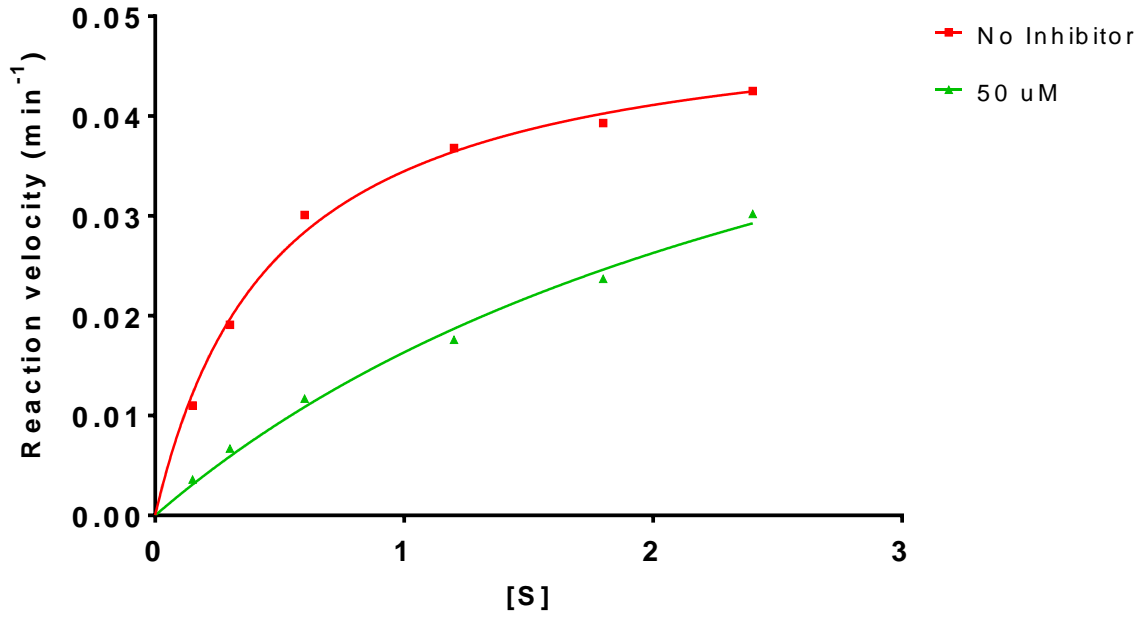

Hanes-Wolf plot  
 ●-galactosidase (Coffee)  
 N1-Nonyl (26)

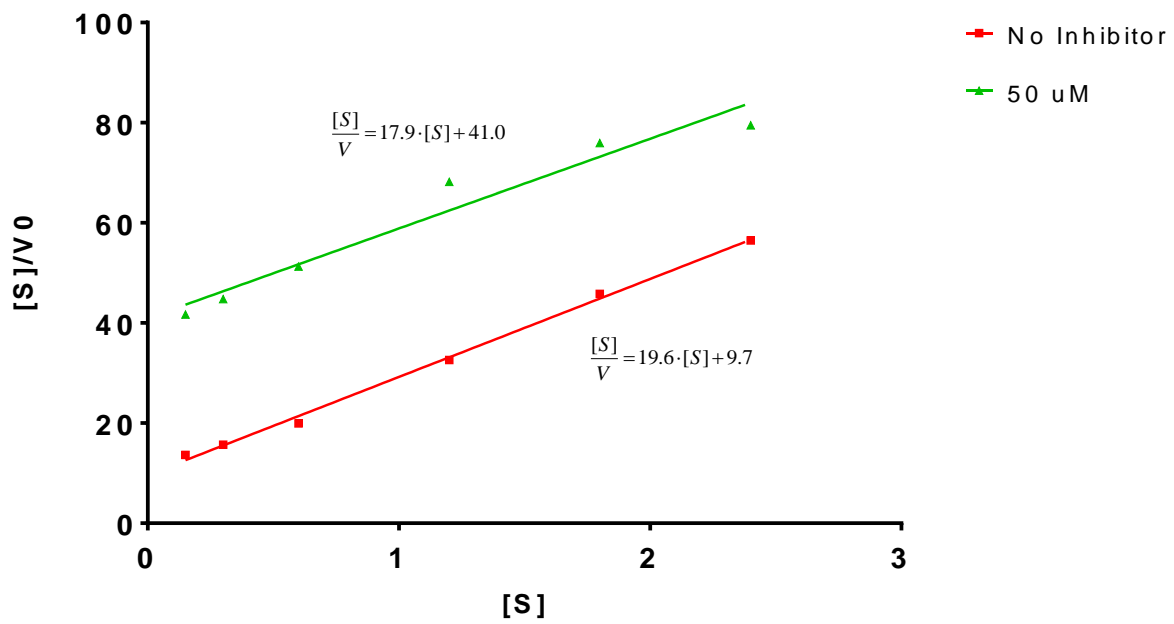

Michaelis-Menten plot  
 ●-galactosidase (Coffee)  
 N2-Butyl (5-HCl)

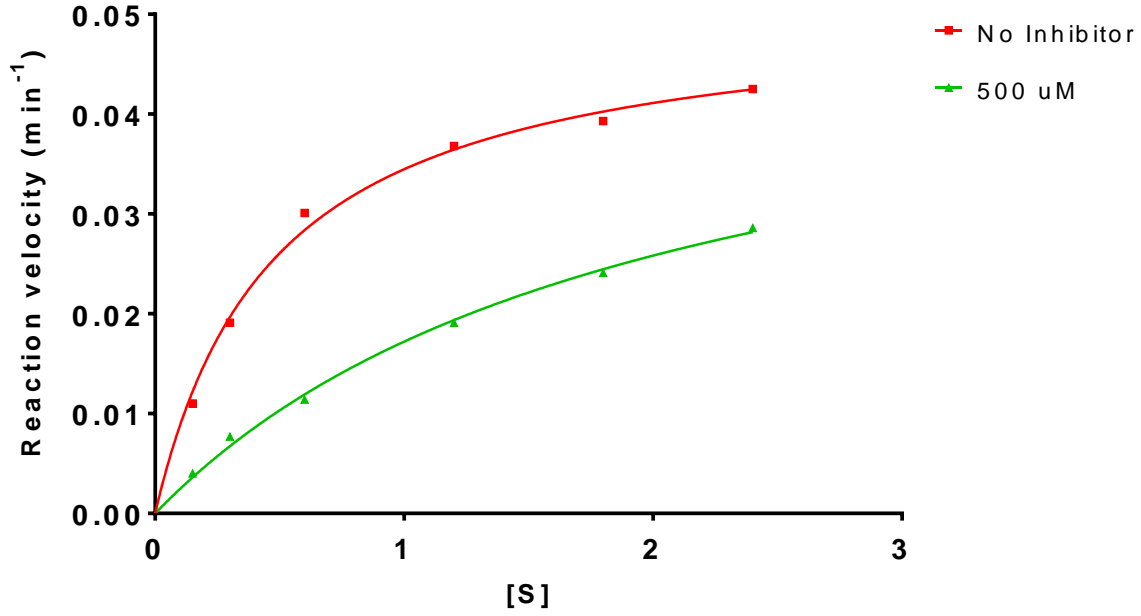

Hanes-Wolf plot  
 ●-galactosidase (Coffee)  
 N2-Butyl (5-HCl)

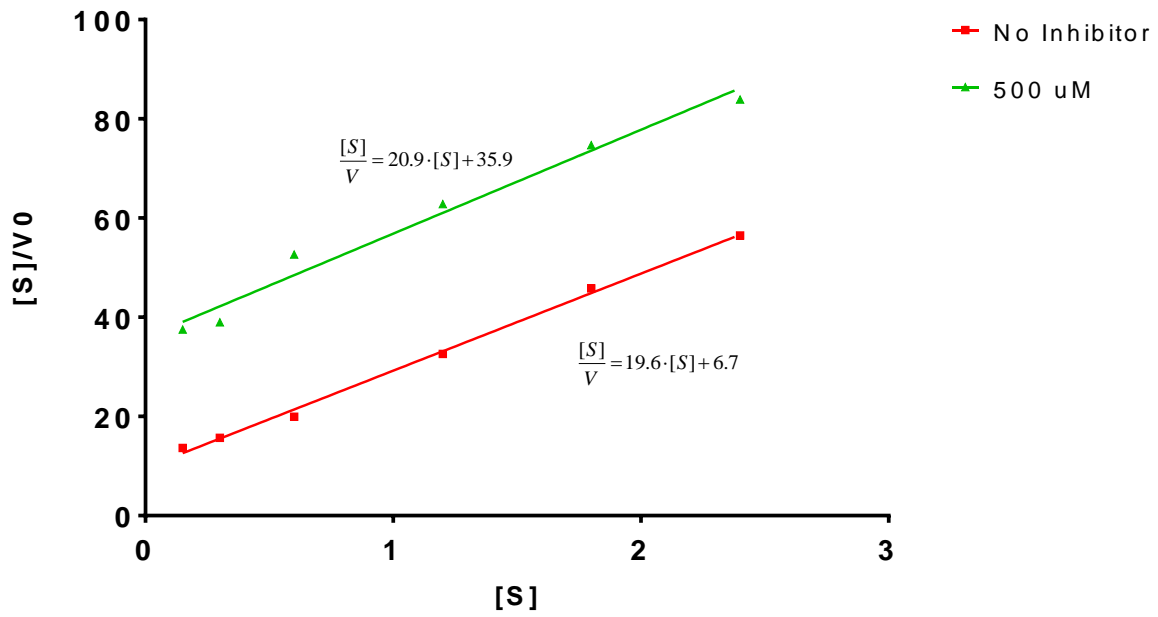

Michaelis-Menten plot  
 ●-galactosidase (Coffee)  
 N2-Nonyl (34)

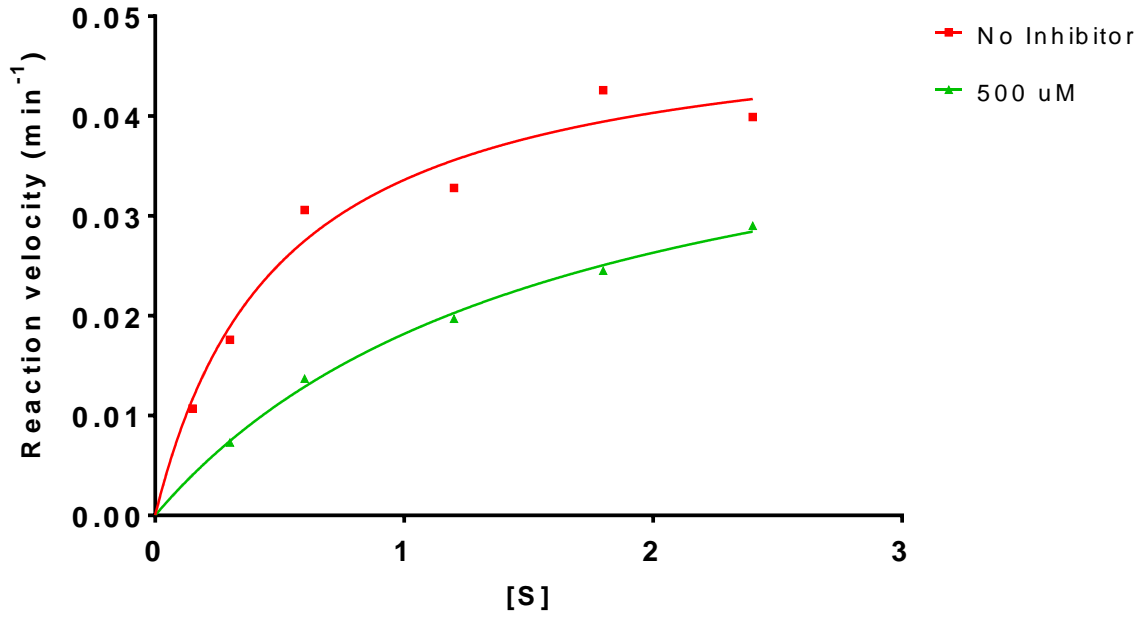

Hanes-Wolf plot  
 ●-galactosidase (Coffee)  
 N2-Nonyl (34)

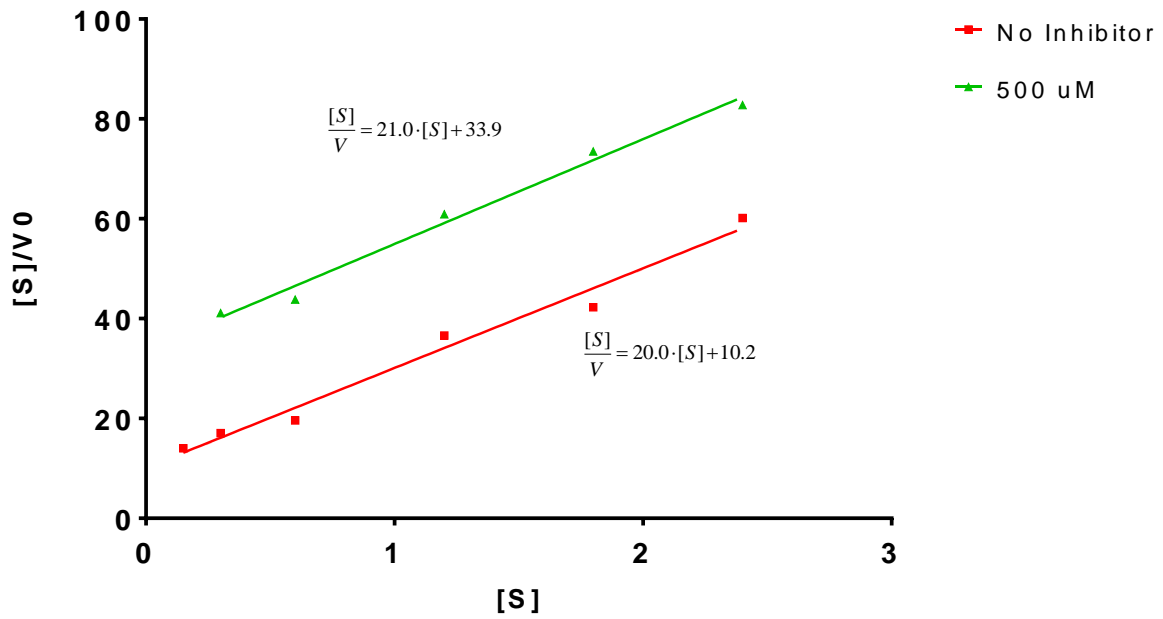

Michaelis-Menten plot  
Galactocerebrosidase (mouse)  
N1-Phenethyl (28)

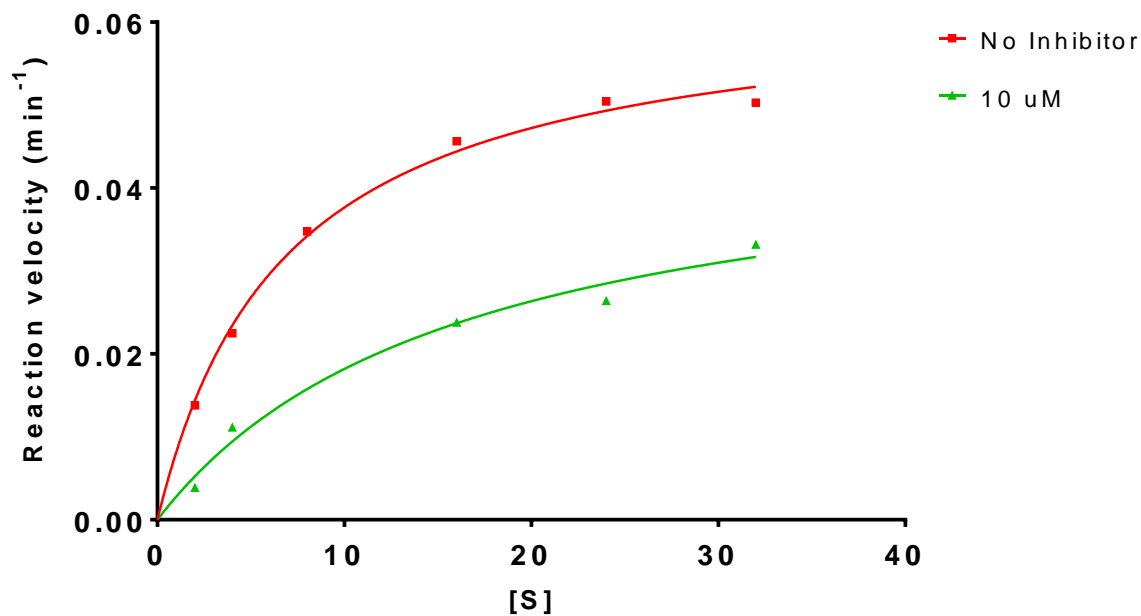

Hanes-Wolf plot  
Galactocerebrosidase (mouse)  
N1-Phenethyl (28)

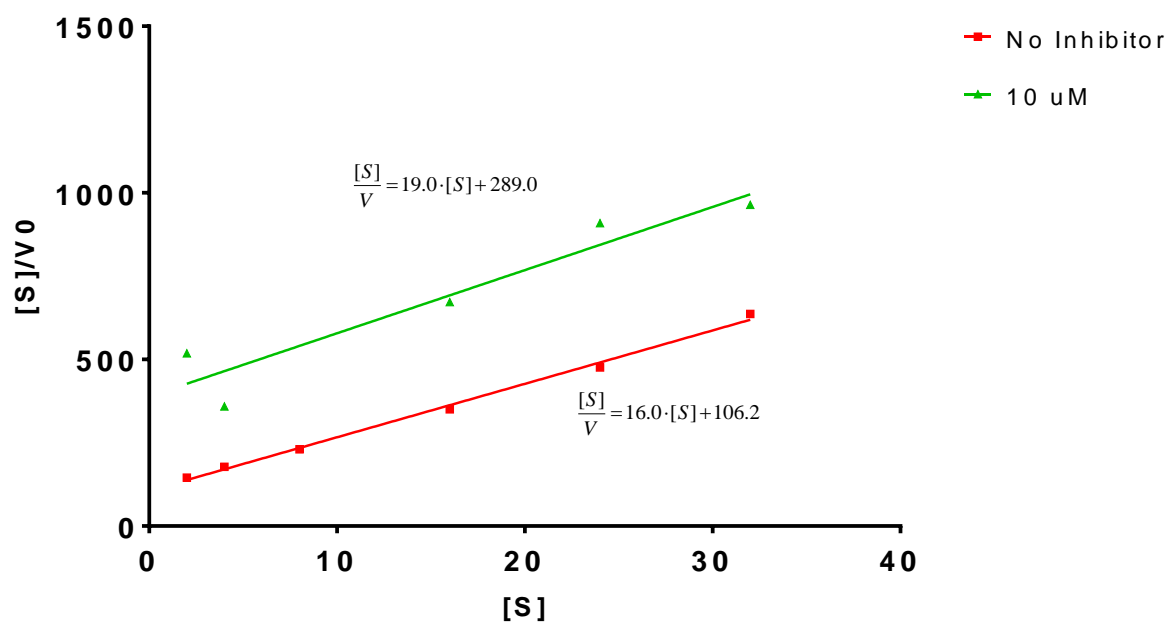

**Michaelis-Menten plot**  
**Galactocerebrosidase (mouse)**  
**N2-Butyl (5-HCl)**

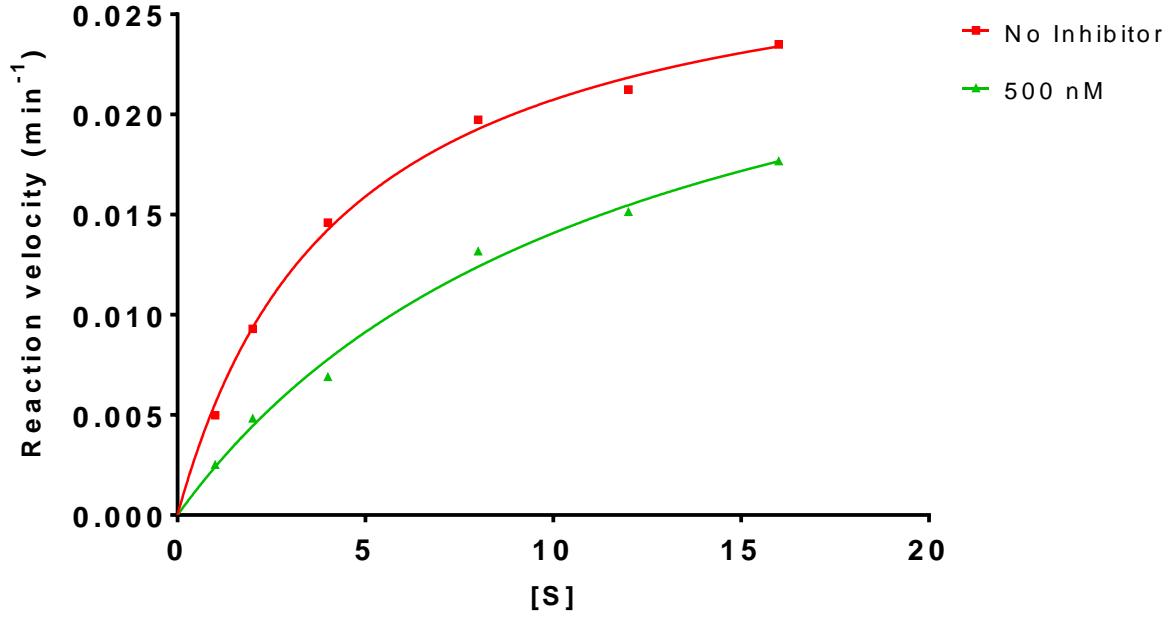

**Hanes-Wolf plot**  
**Galactocerebrosidase (mouse)**  
**N2-Butyl (5-HCl)**

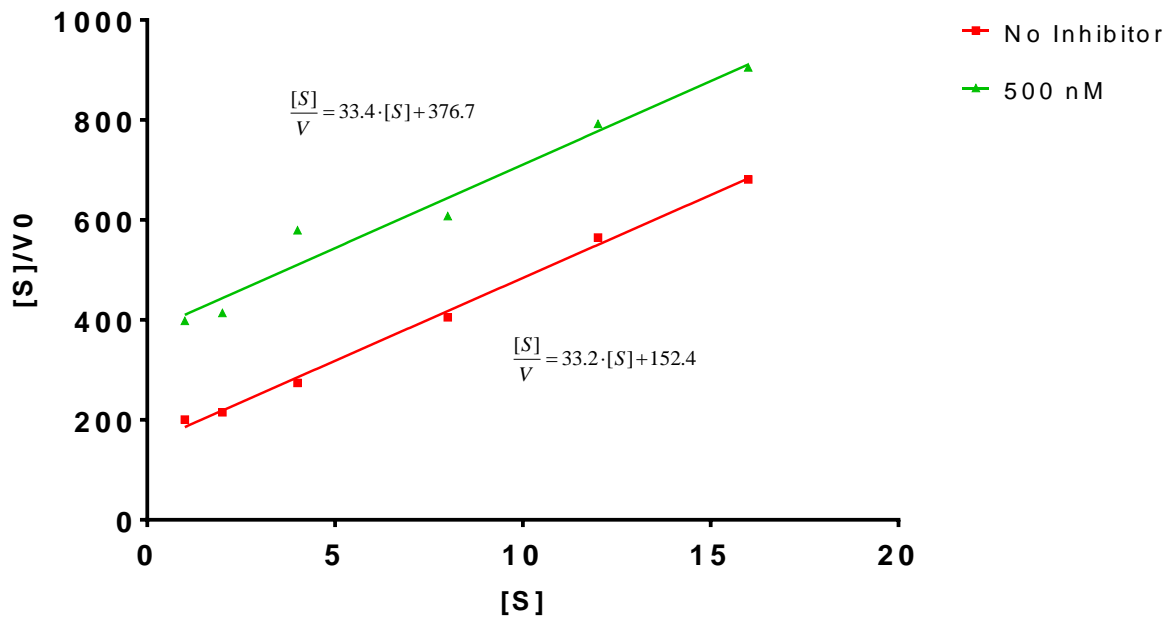



Michaelis-Menten plot  
Galactocerebrosidase (mouse)  
N2-Nonyl (34)

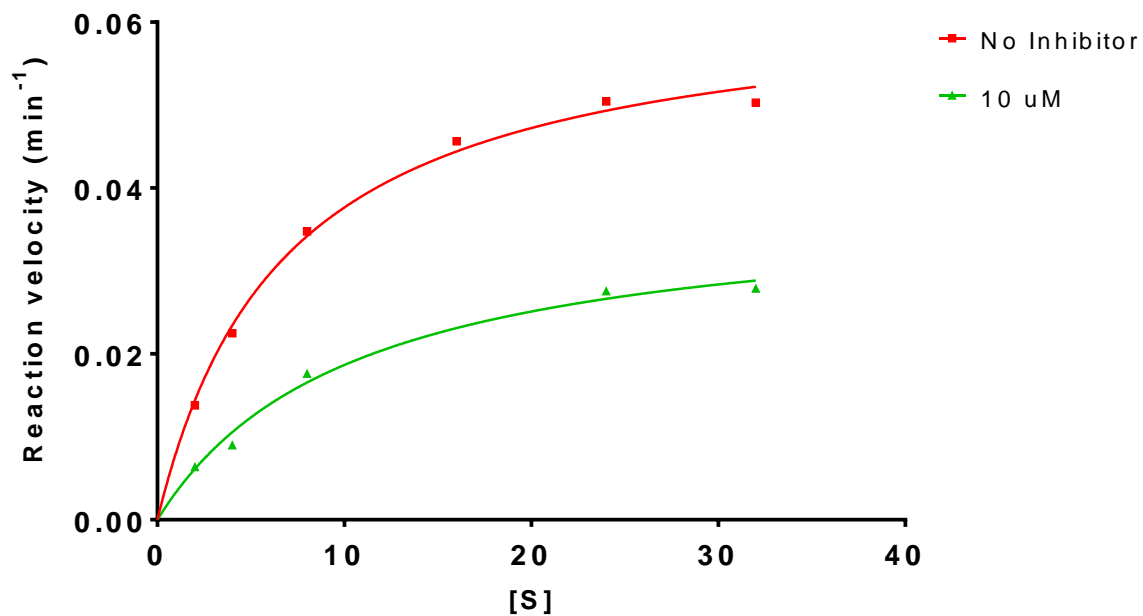

Hanes-Wolf plot  
Galactocerebrosidase (mouse)  
N2-Nonyl (34)

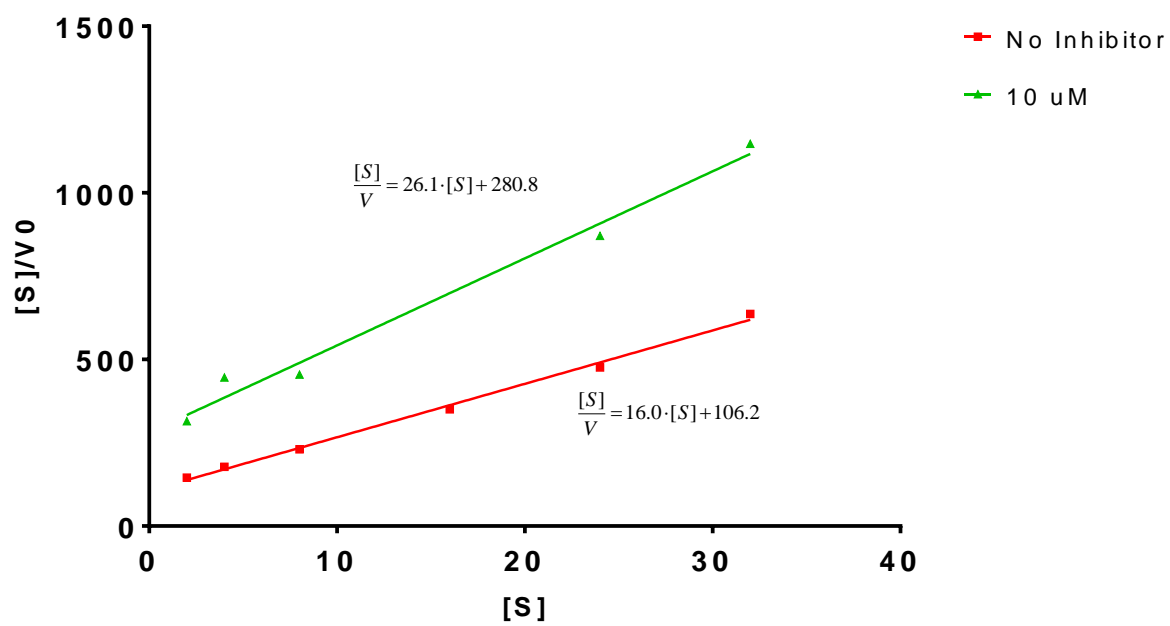

Supplement: c6ob01309k1.pdf [file c6ob01309k1.pdf]
